# Supplementary material for: In Silico Assisted Identification, Synthesis, and In Vitro Pharmacological Characterization of Potent and Selective Blockers of the Epilepsy-Associated KCNT1 Channel
Source: PubMed Central journal article supplement — J Med Chem. 2024 May 23;67(11):9124–49. doi: 10.1021/acs.jmedchem.4c00268 (PMC11181338; doi:10.1021/acs.jmedchem.4c00268), 2024-05-23
Supplement: jm4c00268_si_001.pdf [file jm4c00268_si_001.pdf]

## SUPPORTING INFORMATION

### ***In silico* assisted identification, synthesis and *in vitro* pharmacological characterization of potent and selective blockers of the epilepsy-associated KCNT1 channel**

Nunzio Iraci,<sup>‡,#</sup> Lidia Carotenuto,<sup>¶,#</sup> Tania Ciaglia,<sup>‡,#</sup> Giorgio Belperio,<sup>‡,#</sup> Francesca Di Matteo,<sup>‡</sup> Ilaria Mosca,<sup>‡</sup> Giusy Carleo,<sup>¶</sup> Manuela Basilicata,<sup>^</sup> Paolo Ambrosino,<sup>‡</sup> Rita Turcio,<sup>‡</sup> Deborah Puzo,<sup>‡</sup> Giacomo Pepe,<sup>‡</sup> Isabel Gomez-Monterrey,<sup>§</sup> Maria Virginia Soldovieri,<sup>‡</sup> Veronica Di Sarno,<sup>‡</sup> Pietro Campiglia,<sup>‡</sup> Francesco Miceli,<sup>¶</sup> Alessia Bertamino,<sup>‡</sup> Carmine Ostacolo,<sup>‡,\*</sup> Maurizio Tagliatalata.<sup>¶,\*</sup>

<sup>‡</sup> Department of Chemical, Biological, Pharmaceutical and Environmental Sciences (CHIBIOFARAM), University of Messina, Viale F. Stagno d'Alcontres 31, 98166, Messina, Italy

<sup>¶</sup> Department of Neuroscience, Reproductive Sciences and Dentistry, University Federico II of Naples, Via S. Pansini, 5, 80131, Naples, Italy

<sup>‡</sup> Department of Pharmacy, University of Salerno, Via G. Paolo II 132, 84084, Fisciano, SA, Italy

<sup>^</sup> Department of advanced Medical and Surgical Sciences, University of Campania "Luigi Vanvitelli", P.zza L. Miraglia 2, 80138, Naples, Italy

<sup>‡</sup> Department of Science and Technology, University of Sannio, Via F. De Sanctis, 82100, Benevento, Italy

<sup>‡</sup> Department of Medicine and Health Science, University of Molise, Via C. Gazzani, 86100, Campobasso, Italy

<sup>§</sup> Department of Pharmacy, University Federico II of Naples, Via D. Montesano 49, 80131, Naples, Italy

\*Corresponding authors (Maurizio Tagliatalata : maurizio.tagliatalata@unina.it; Carmine Ostacolo : costacolo@unisa.it)

#Equal contribution

#### **Table of content:**

- 1. Table S1:** Characterizing chemical-physical parameters of the tested molecules...**S2-S7**
- 2. Figures S1-S22:** NMR spectra and CD spectra of the newly synthesized compounds.....**S8-S29**
- 3. Figures S23-S42:** HPLC traces of all the tested compounds.....**S30-S49**
- 4. Figure S43:** Docking poses of **CPK4** (A), **CPK13** (B), **CPK16** (C), **CPK18** (D), **CPK20** (E) and quinidine (F) on HMhKCNT1<sub>98-354</sub>.....**S50**
- 5. Figure S44:** Ligand interaction diagrams of **CPK4** (A), **CPK13** (B), **CPK16** (C), **CPK18** (D), **CPK20** (E) and quinidine (F) in complex with HMhKCNT1<sub>98-354</sub>.....**S51**
- 6. Figure S45:** Functional and pharmacological properties of KCNT1F346S channels..**S52**
- 7. Figure S46:** Pharmacological characterization of selected CPK compounds on KCNT1 or KCNT1 F346S channels.....**S53**
- 8. Table S2:** Method validation parameters for LCMS quantitation of test compounds...**S54**
- 9. Figure S47:** Linear regression of the % remaining parent compounds **CPK19** and **CPK20** plotted against incubation time.....**S54**
- 10. Figure S48:** Compound **CPK18** main metabolites.....**S55**
- 11. Figure S49:** Molecular structures of compound **CPK18** main oxidized metabolites...**S56**
- 12. Figure S50:** Molecular structures of compound **CPK18** glucuronic metabolites.....**S57**

| Compound           | Chemical structure                                                                  | Docking score (kcal/mol) | MW      | SASA <sup>a,c</sup> | PSA <sup>a,d</sup> | HBDs <sup>a,e</sup> | HBAs <sup>a,e</sup> | LogP <sup>a,f</sup> | Chiral centers | Rotatable bonds <sup>a,b</sup> |
|--------------------|-------------------------------------------------------------------------------------|--------------------------|---------|---------------------|--------------------|---------------------|---------------------|---------------------|----------------|--------------------------------|
| CPK1 <sup>50</sup> | 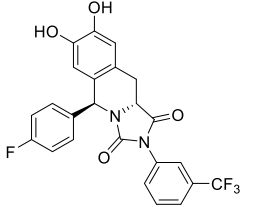   | -11.200                  | 472.395 | 692.726             | 101.373            | 2                   | 5                   | 4.738               | 2              | 2                              |
| CPK2               |    | -12.444                  | 524.702 | 956.515             | 53.335             | 1                   | 4.75                | 7.966               | 1              | 12                             |
| CPK3               |   | -11.033                  | 379.458 | 680.787             | 86.184             | 2                   | 5.75                | 3.517               | 1              | 5                              |
| CPK4 <sup>51</sup> |  | -10.328                  | 355.454 | 683.486             | 49.646             | 2                   | 3                   | 4.261               | 0              | 5                              |

| Compound           | Chemical structure                                                                  | Docking score (kcal/mol) | MW      | SASA <sup>a, b</sup> | PSA <sup>a, c</sup> | HBDs <sup>a, d</sup> | HBAs <sup>a, d</sup> | LogP <sup>a, e</sup> | Chiral centers | Rotatable bonds <sup>a, f</sup> |
|--------------------|-------------------------------------------------------------------------------------|--------------------------|---------|----------------------|---------------------|----------------------|----------------------|----------------------|----------------|---------------------------------|
| CPK5               | 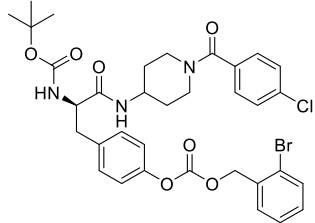   | -11.173                  | 715.039 | 1067.831             | 142.171             | 1.25                 | 9.75                 | 6.901                | 1              | 10                              |
| CPK6 <sup>52</sup> |    | -11.388                  | 357.47  | 740.999              | 73.336              | 3.5                  | 4.5                  | 4.586                | 0              | 11                              |
| CPK7               |   | -13.156                  | 578.755 | 1011.543             | 3.400               | 0                    | 0                    | 12.737               | 0              | 8                               |
| CPK8               |  | -12.576                  | 598.718 | 960.68               | 167.577             | 5                    | 8.5                  | 5.442                | 3              | 11                              |

| Compound            | Chemical structure                                                                  | Docking score<br>(kcal/mol) | MW      | SASA <sup>a, b</sup> | PSA <sup>a, c</sup> | HBDs <sup>a, d</sup> | HBAs <sup>a, d</sup> | L <sup>a, e</sup> | Chiral centers | Rotatable bonds <sup>a, f</sup> |
|---------------------|-------------------------------------------------------------------------------------|-----------------------------|---------|----------------------|---------------------|----------------------|----------------------|-------------------|----------------|---------------------------------|
| CPK9 <sup>53</sup>  | 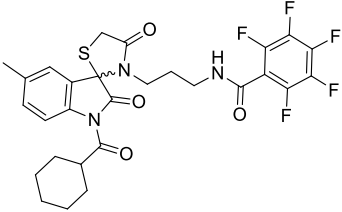   | -10.434                     | 595.583 | 845.541              | 111.409             | 1                    | 9                    | 4.985             | 1              | 6                               |
| CPK10               |    | -12.710                     | 696.18  | 1020.559             | 110.388             | 1.25                 | 9.5                  | 7.354             | 1              | 11                              |
| CPK11 <sup>54</sup> |   | -10.744                     | 538.62  | 887.828              | 107.651             | 1                    | 4                    | 6.684             | 0              | 11                              |
| CPK12 <sup>55</sup> |  | -10.828                     | 402.483 | 682.372              | 76.427              | 1                    | 7.5                  | 3.374             | 0              | 4                               |

| Compound            | Chemical structure                                                                  | Docking score<br>(kcal/mol) | MW      | SASA <sup>a, b</sup> | PSA <sup>a, c</sup> | HBDs <sup>a, d</sup> | HBAs <sup>a, d</sup> | LogP <sup>a, e</sup> | Chiral centers | Rotatable bonds <sup>a, f</sup> |
|---------------------|-------------------------------------------------------------------------------------|-----------------------------|---------|----------------------|---------------------|----------------------|----------------------|----------------------|----------------|---------------------------------|
| CPK13 <sup>55</sup> | 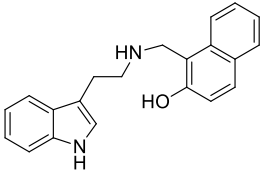   | -10.154                     | 316.402 | 607.332              | 44.605              | 3                    | 2.25                 | 4.109                | 0              | 6                               |
| CPK14 <sup>56</sup> |    | -12.02                      | 477.623 | 830.959              | 17.447              | 1                    | 3                    | 8.157                | 1              | 9                               |
| CPK15 <sup>57</sup> |   | -10.178                     | 608.064 | 887.55               | 128.404             | 0                    | 9.25                 | 5.548                | 2              | 6                               |
| CPK16 <sup>57</sup> |  | -10.139                     | 495.774 | 649.802              | 91.815              | 1                    | 8                    | 3.712                | 2              | 3                               |

| Compound            | Chemical structure                                                                  | Docking score (kcal/mol) | MW      | SASA <sup>a, b</sup> | PSA <sup>a, c</sup> | HBDs <sup>a, d</sup> | HBAs <sup>a, d</sup> | LogP <sup>a, e</sup> | Chiral centers | Rotatable bonds <sup>a, f</sup> |
|---------------------|-------------------------------------------------------------------------------------|--------------------------|---------|----------------------|---------------------|----------------------|----------------------|----------------------|----------------|---------------------------------|
| CPK17 <sup>53</sup> | 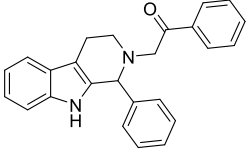   | -11.027                  | 366.462 | 670.154              | 40.916              | 1                    | 4                    | 4.971                | 1              | 3                               |
| CPK18               |    | -13.347                  | 475.589 | 809.766              | 63.395              | 3                    | 4.5                  | 5.778                | 1              | 10                              |
| CPK19               |   | -11.721                  | 410.419 | 706.564              | 92.584              | 4                    | 5.5                  | 2.816                | 2              | 5                               |
| CPK20 <sup>51</sup> |  | -10.733                  | 506.505 | 736.689              | 47.879              | 1                    | 5.5                  | 5.409                | 0              | 5                               |

**Table S1:** Characterizing chemical-physical parameters of the tested molecules. <sup>a</sup> Calculated by mean of QikProp [Schrödinger Release 2019-1: QikProp, Schrödinger, LLC, New York, NY, 2019.]; <sup>b</sup> Total solvent accessible surface area in square angstroms (probe radius 1.4 Å); <sup>c</sup> Polar surface area in square angstroms (probe radius 1.4 Å); <sup>d</sup> Hydrogen bond donors (HBDs) and acceptors (HBAs) counts are averaged over different states, so they can be non-integer; <sup>e</sup> QikProp-predicted octanol/water partition coefficient; <sup>f</sup> Trivial and hindered rotatable bonds are excluded from the count; The number in superscript represent the references to the synthesis of the corresponding derivatives reported in the main text.

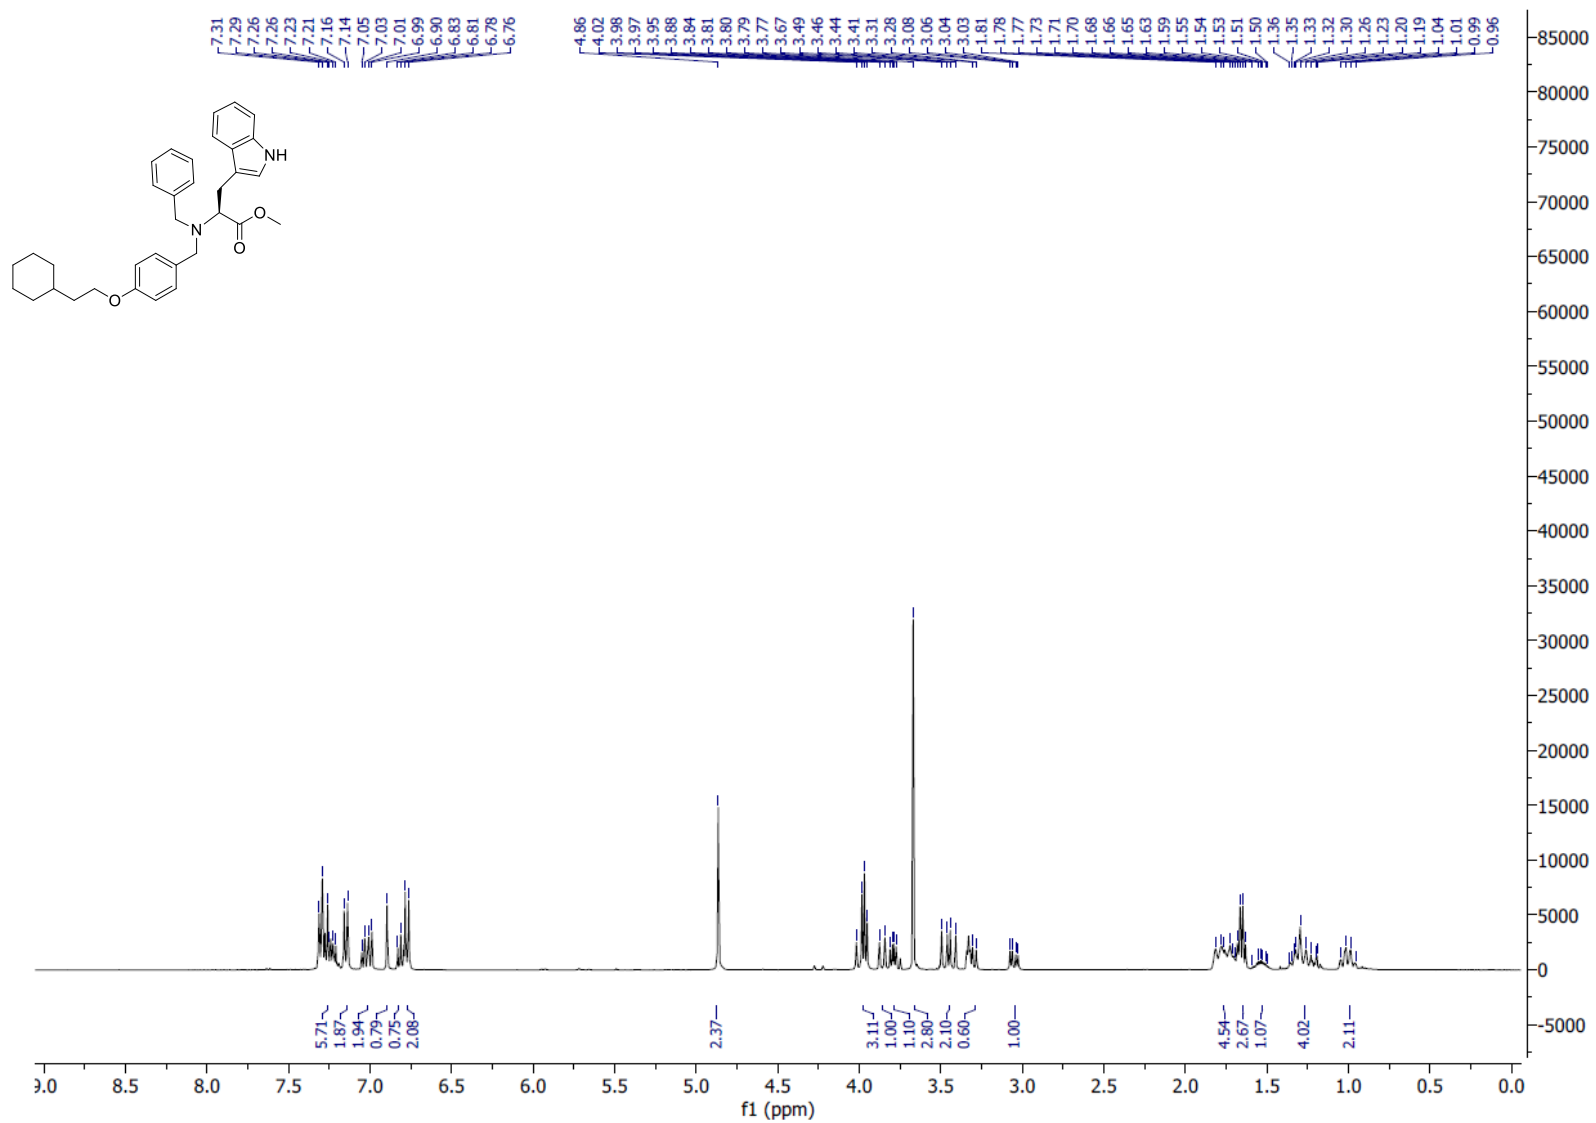

**Figure S1:**  $^1\text{H}$  NMR spectra for compound CPK2



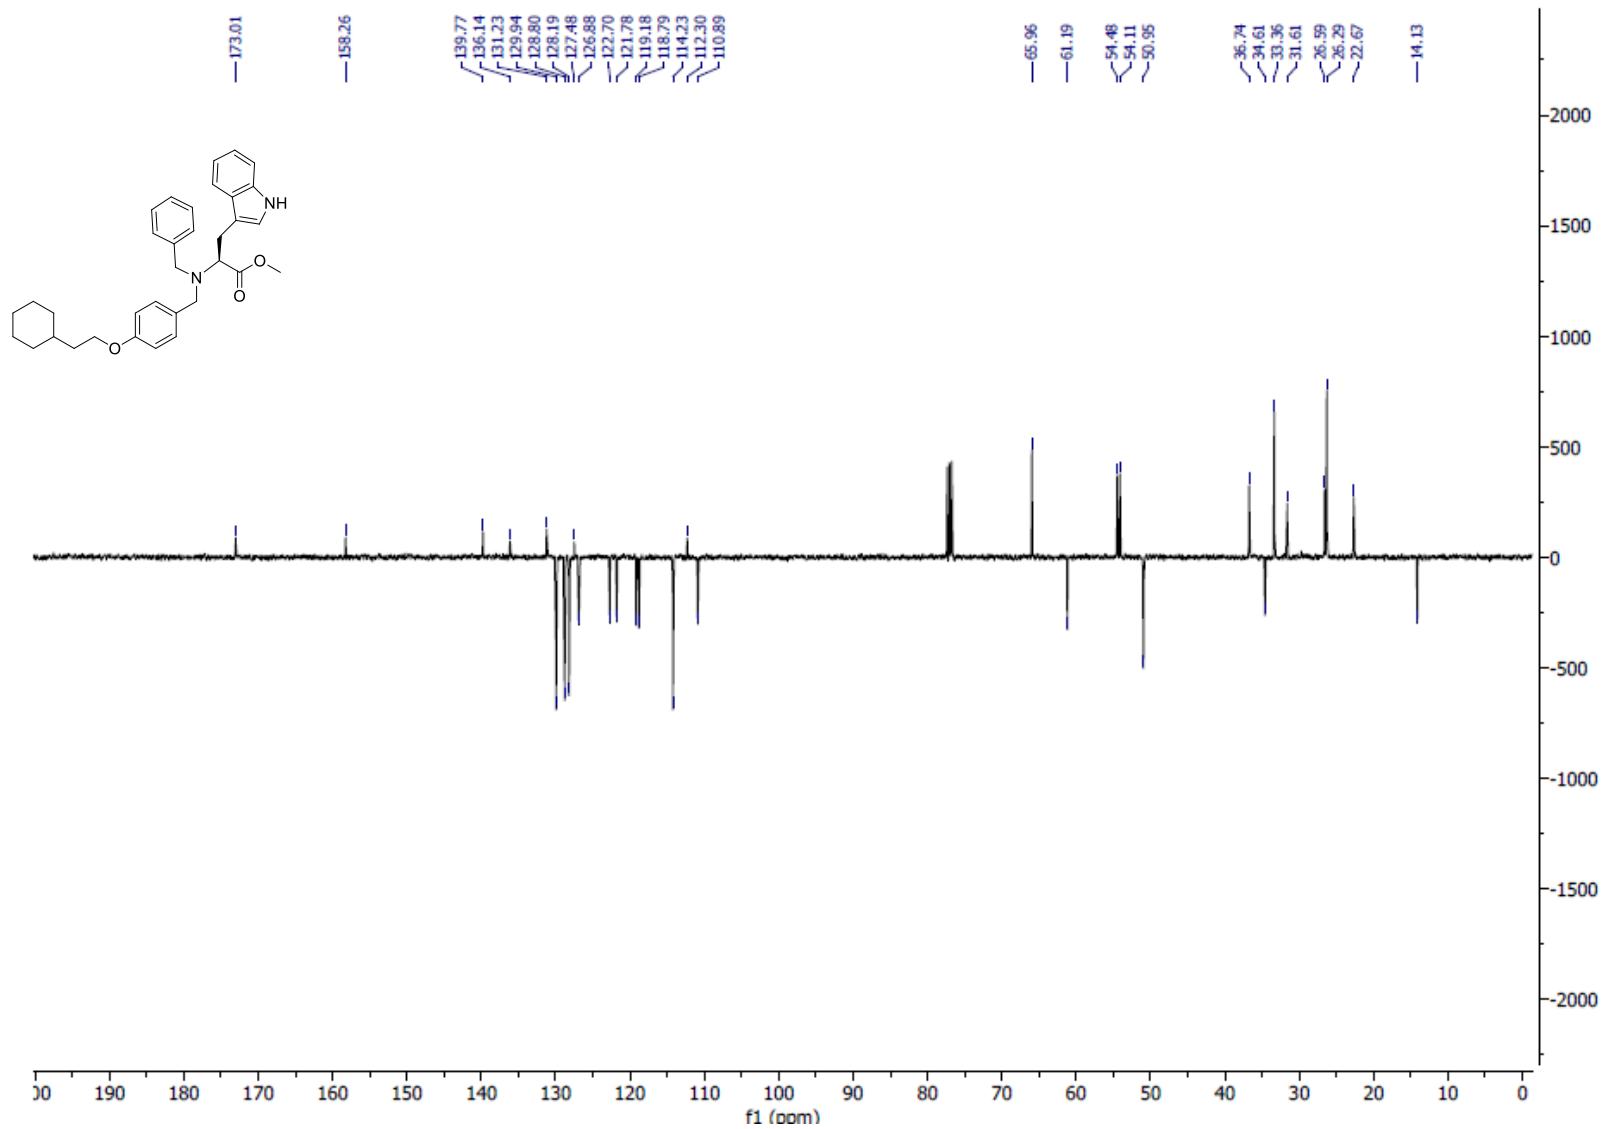

Figure S2: qDEPT NMR spectra for compound CPK2

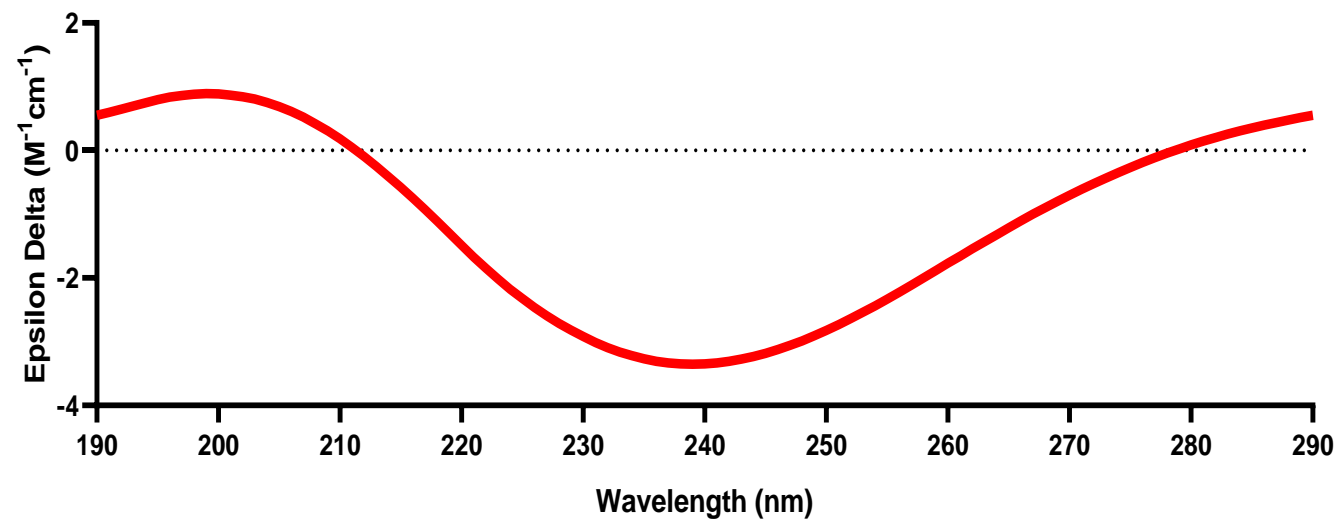

Figure S3: CD spectra for compound CPK2

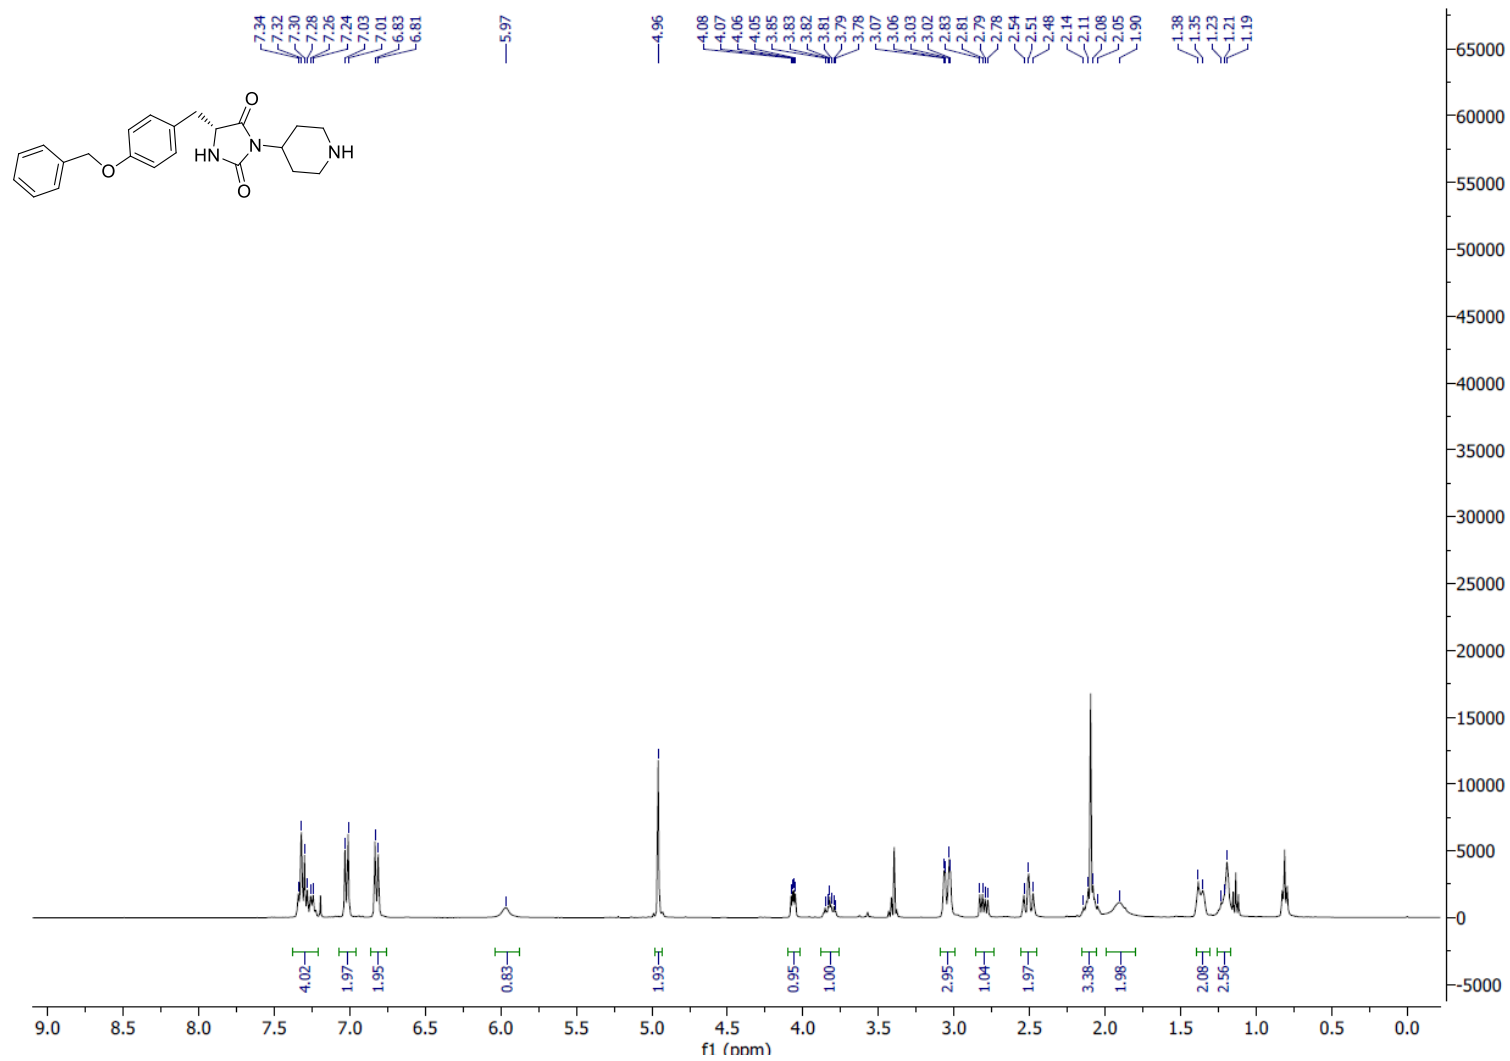

**Figure S4:** <sup>1</sup>H NMR spectra for compound **CPK3**

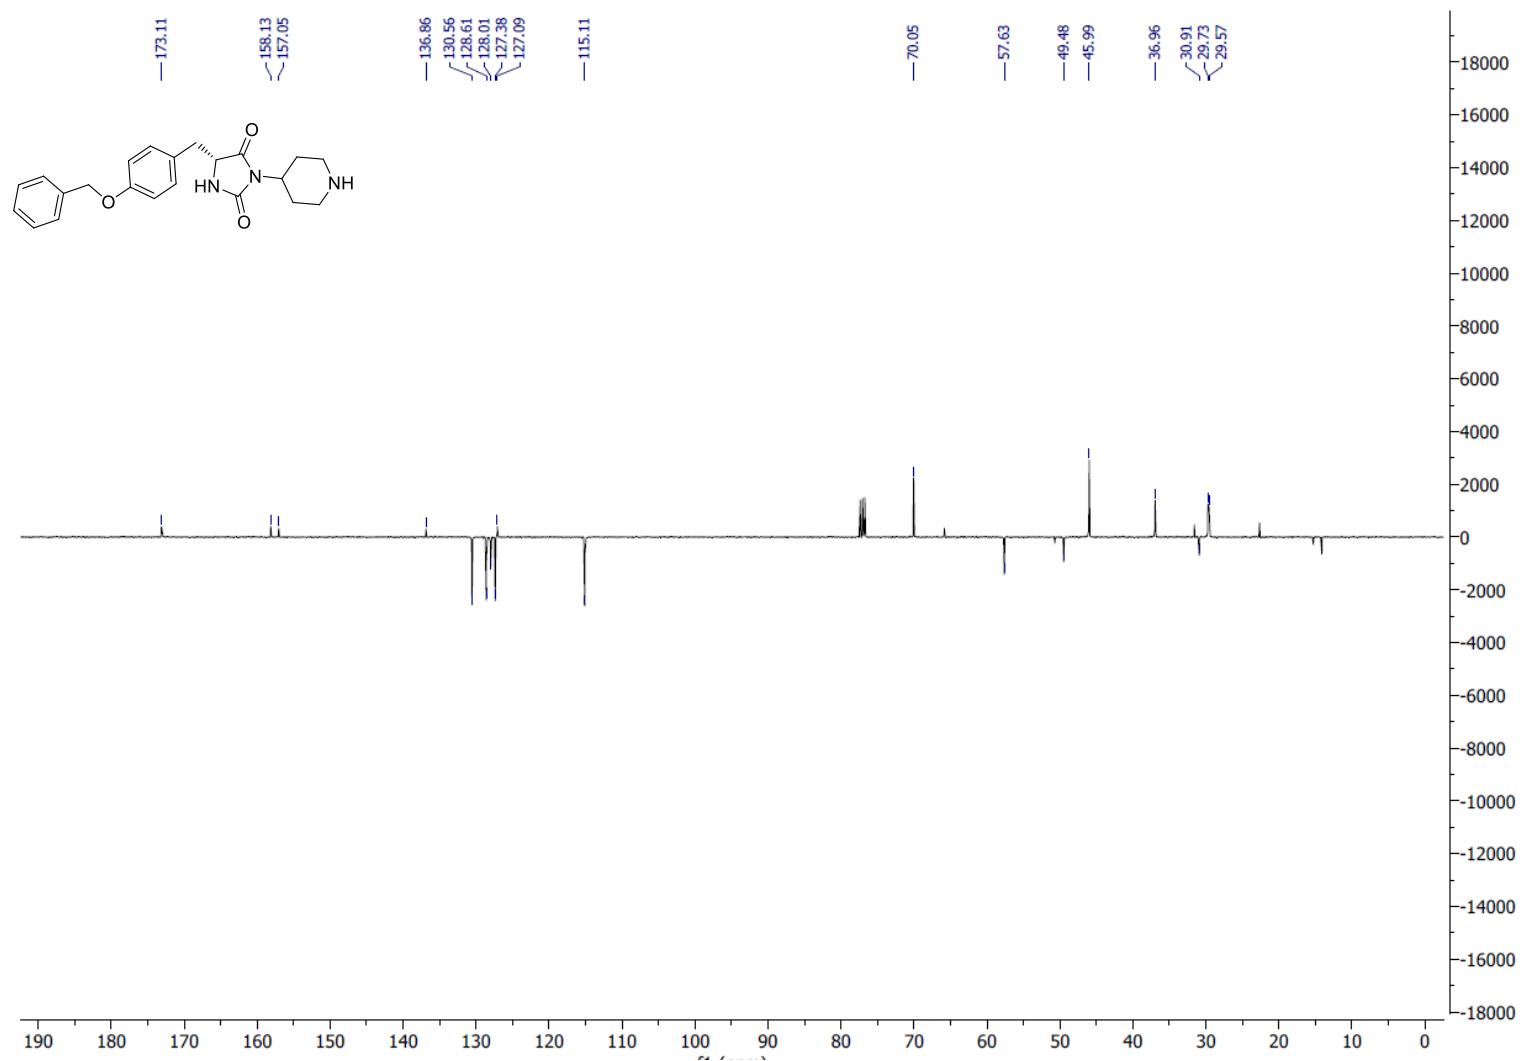

**Figure S5:** qDEPT NMR spectra for compound **CPK3**

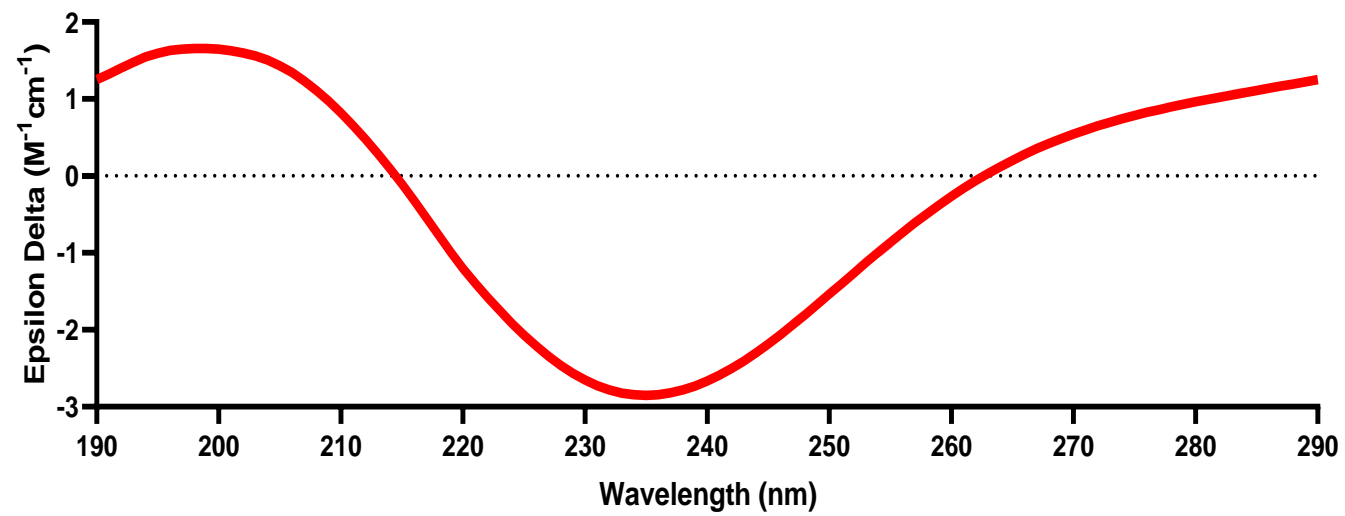

**Figure S6:** CD spectra for compound **CPK3**

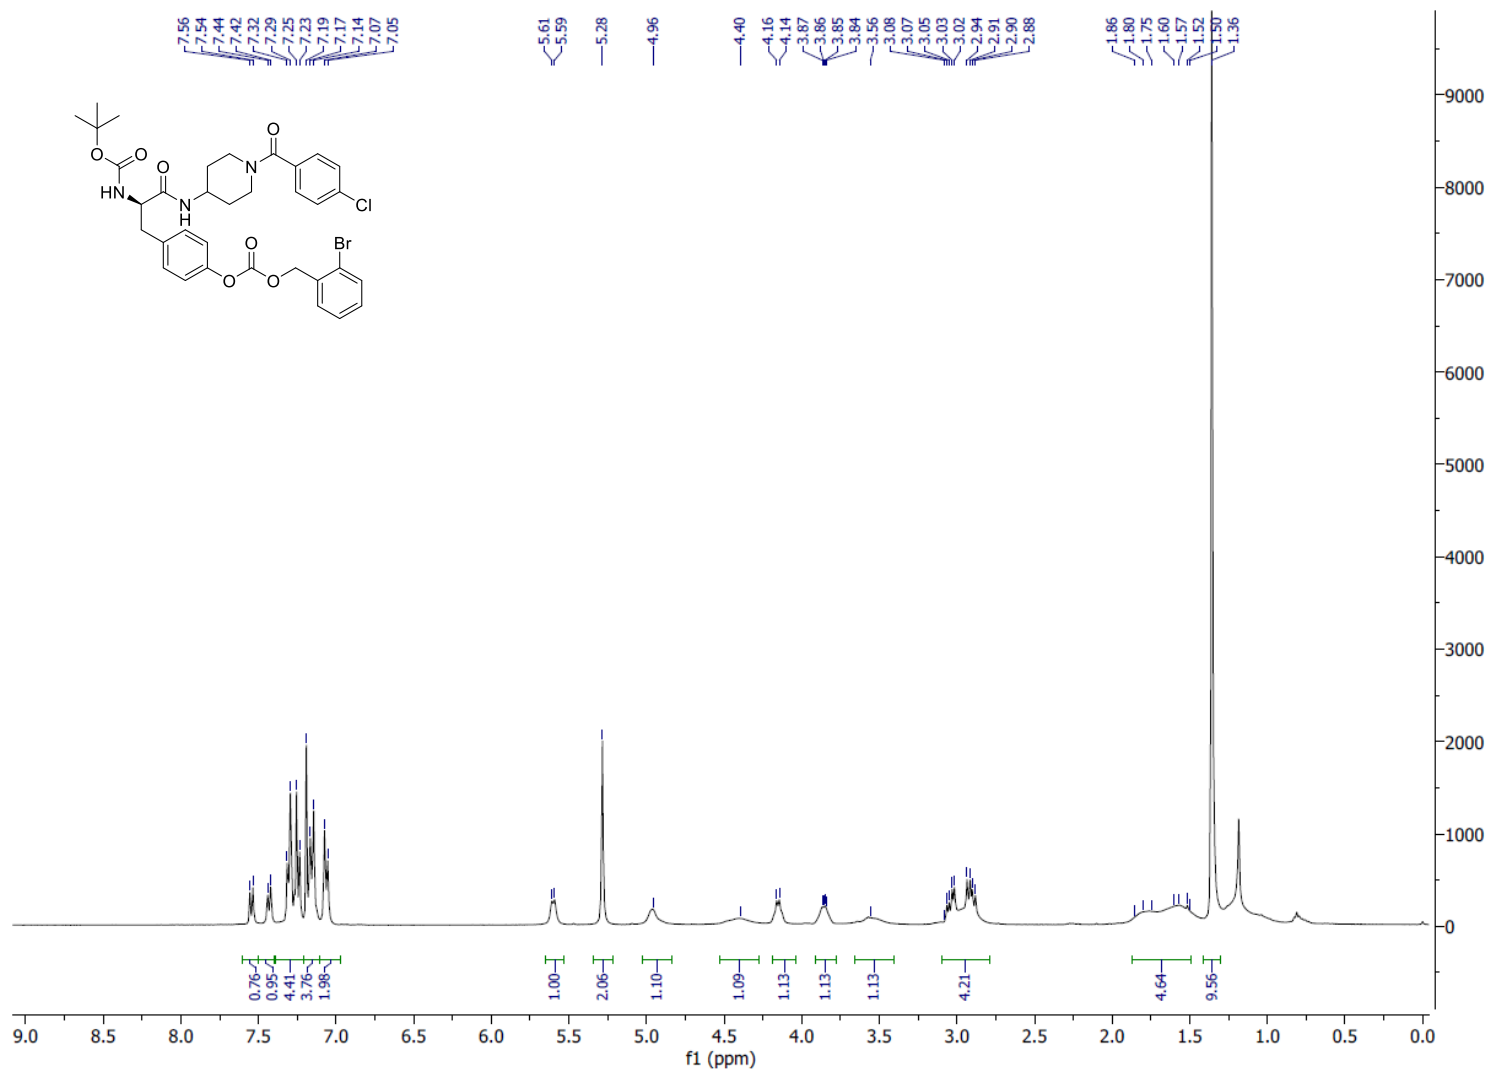

**Figure S7:** <sup>1</sup>H NMR spectra for compound **CPK5**

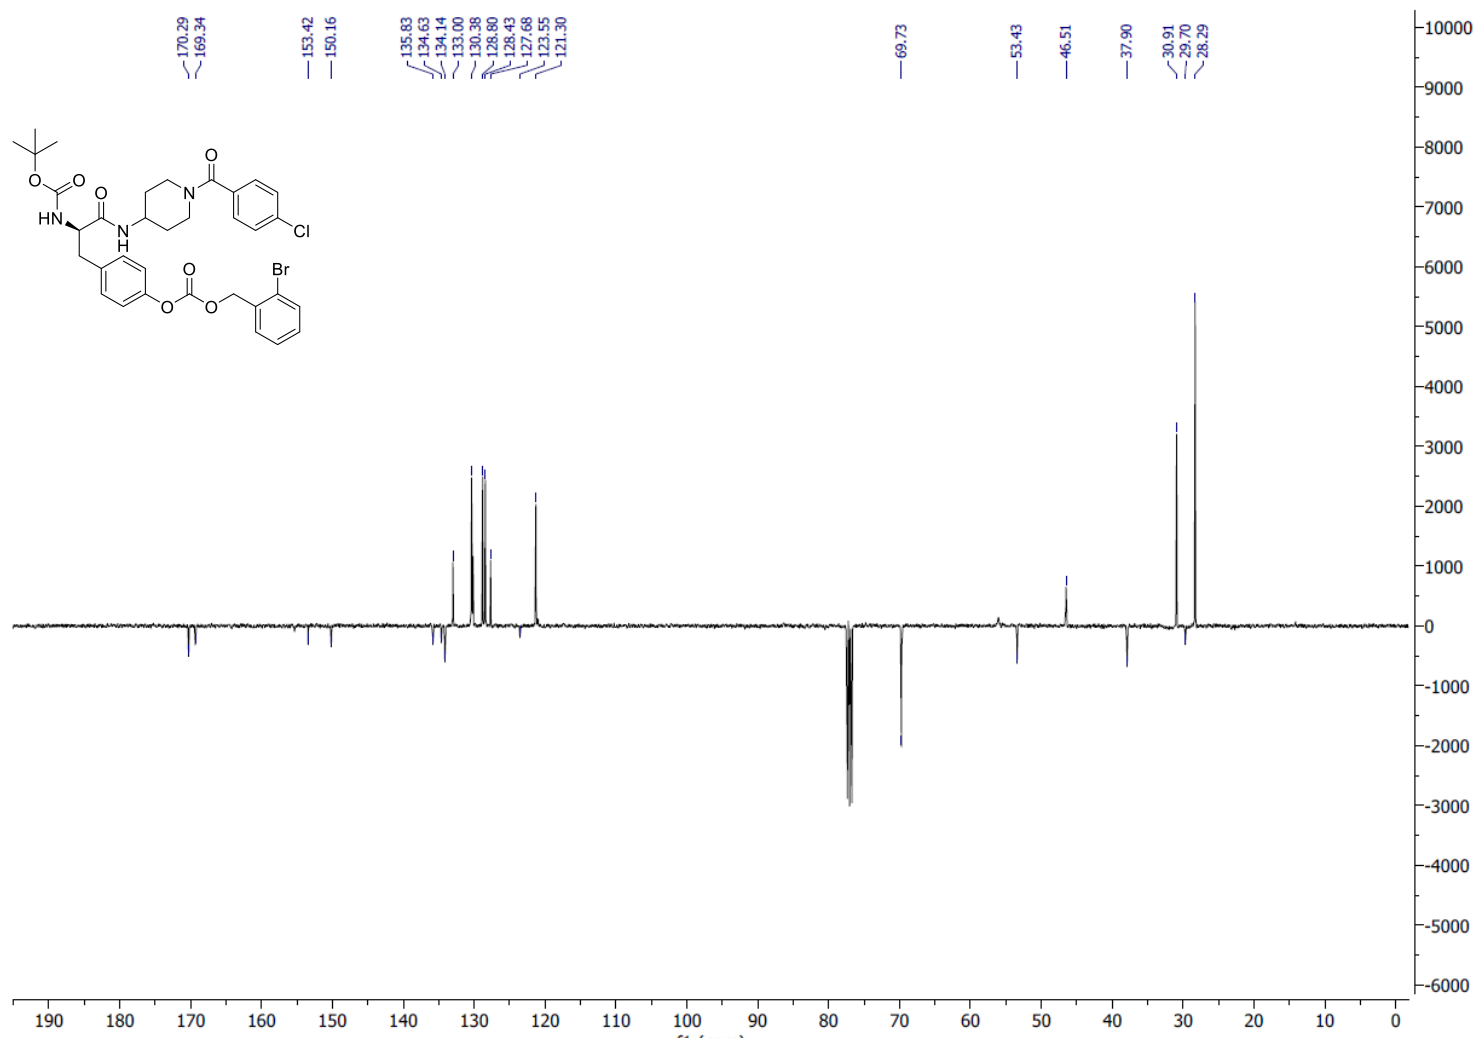

**Figure S8:** qDEPT NMR spectra for compound **CPK5**

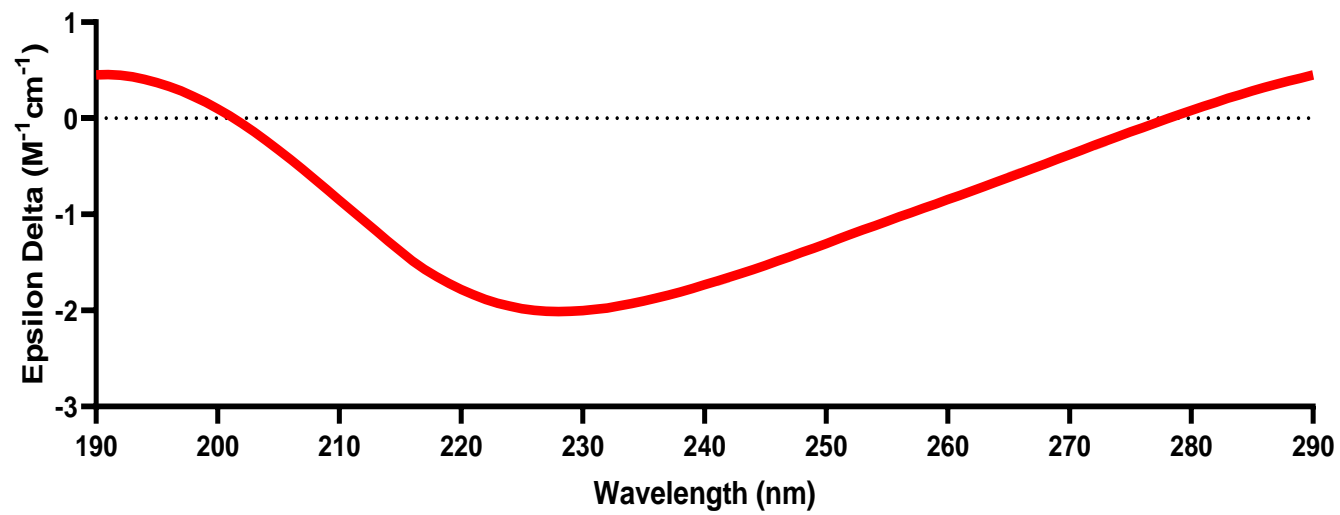

**Figure S9:** CD spectra for compound **CPK5**



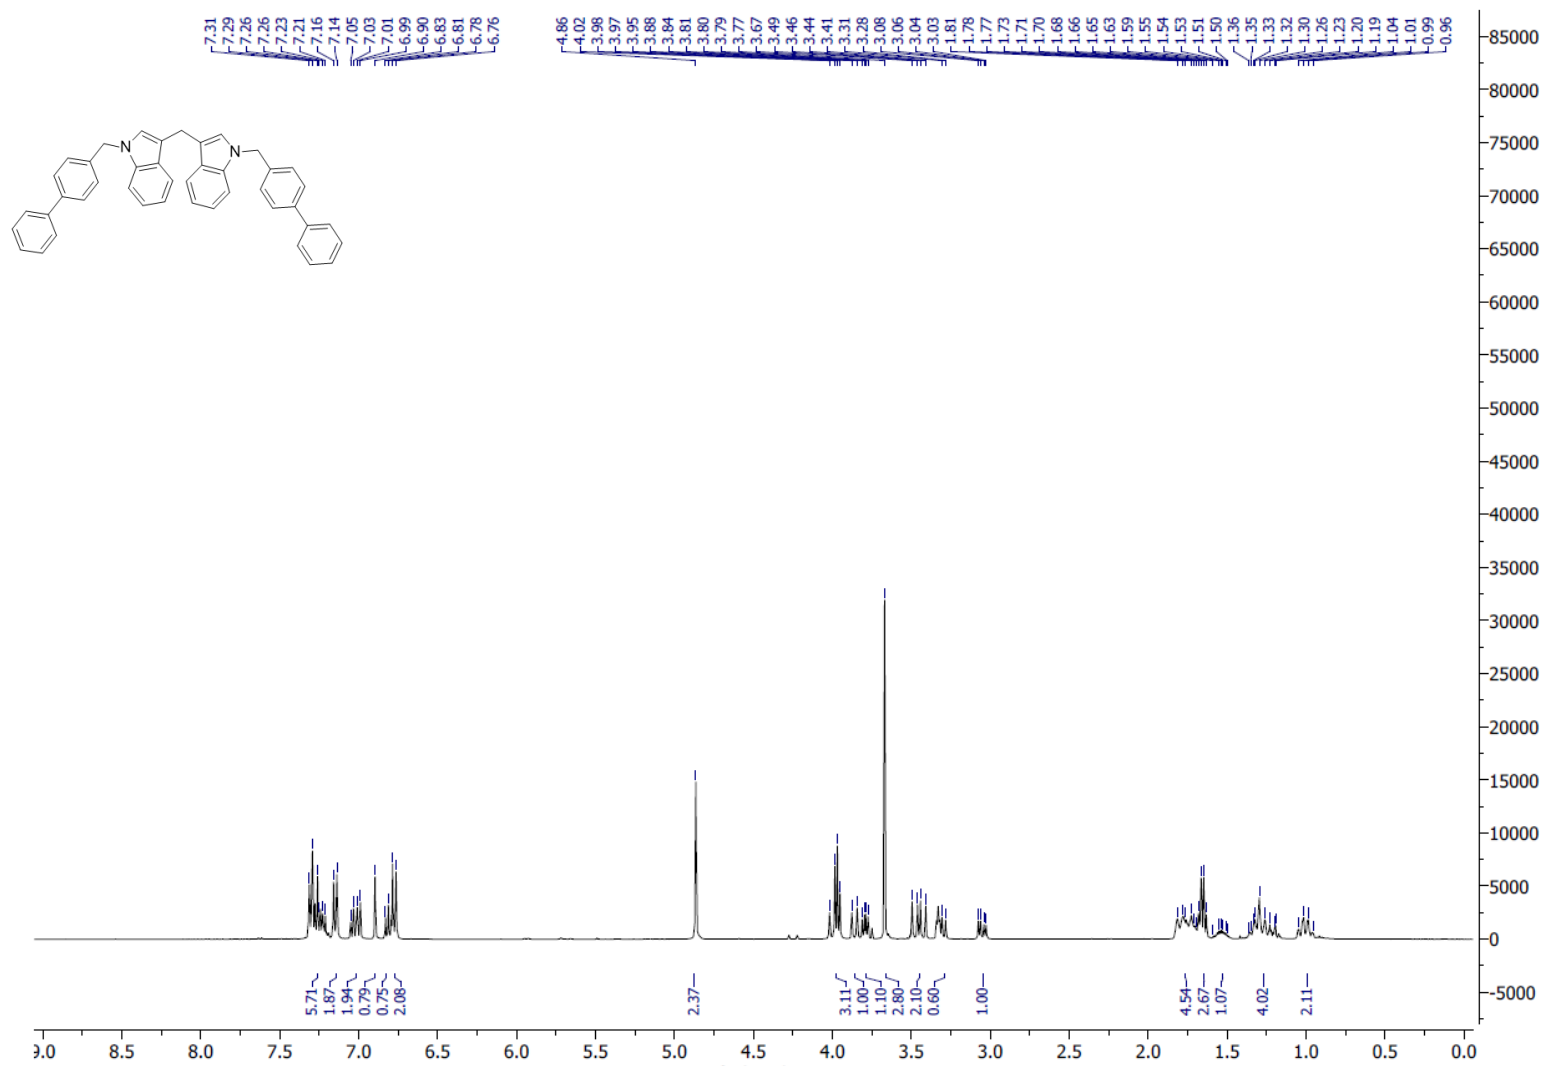

**Figure S10:** <sup>1</sup>H NMR spectra for compound CPK7

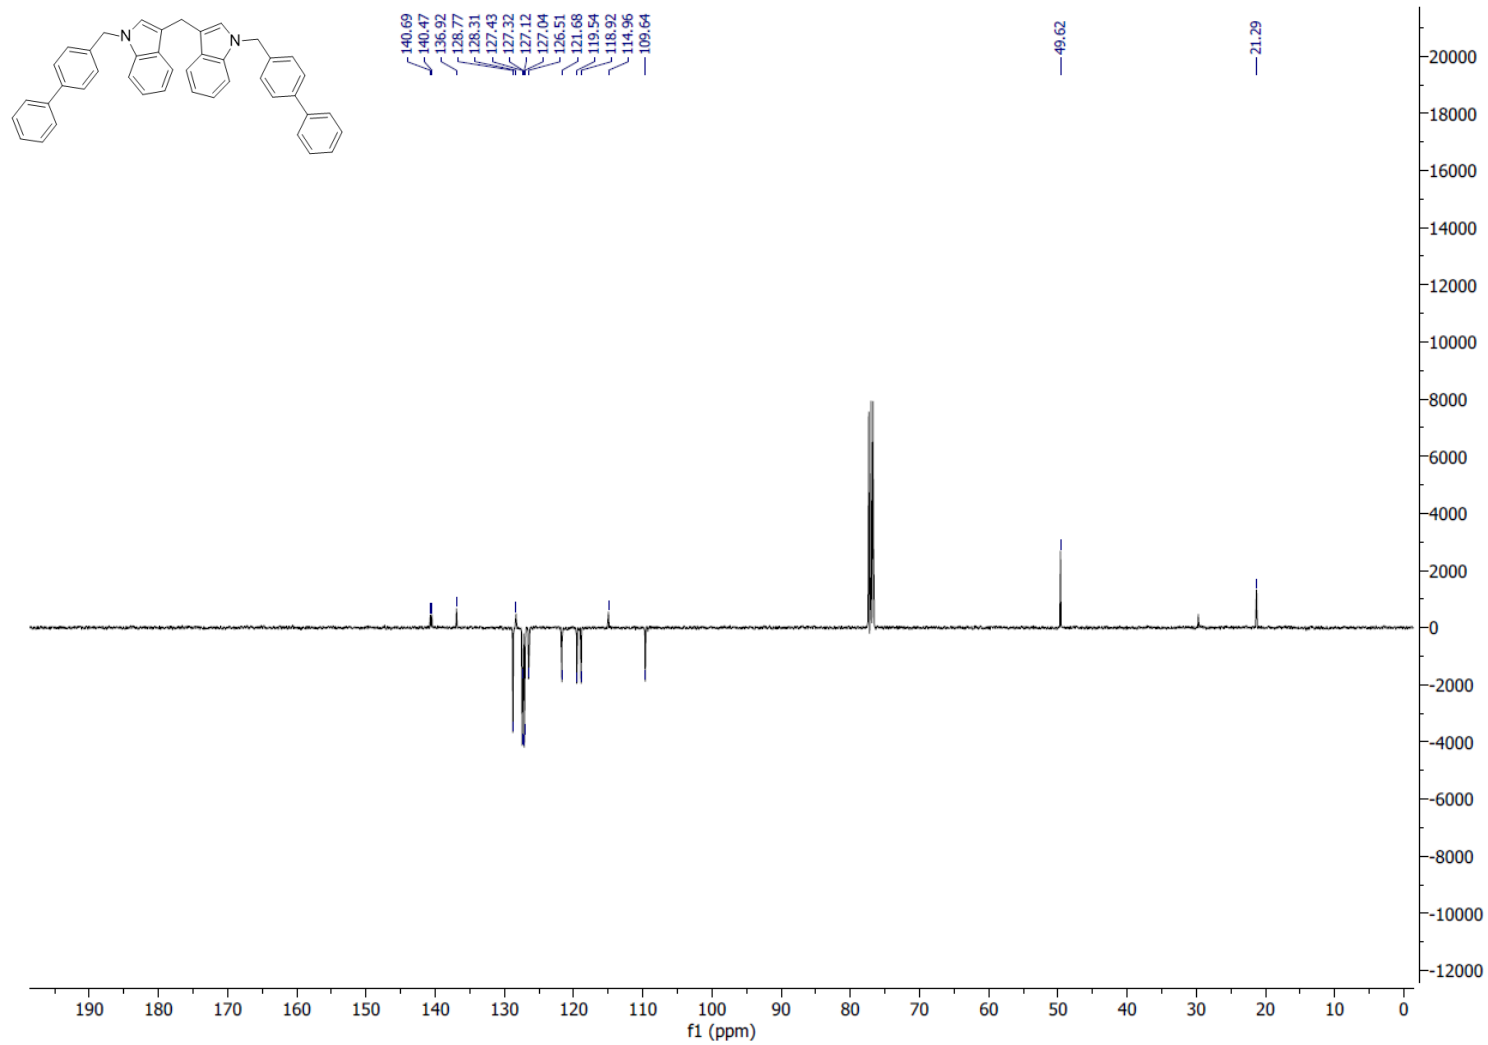

**Figure S11:** qDEPT NMR spectra for compound **CPK7**

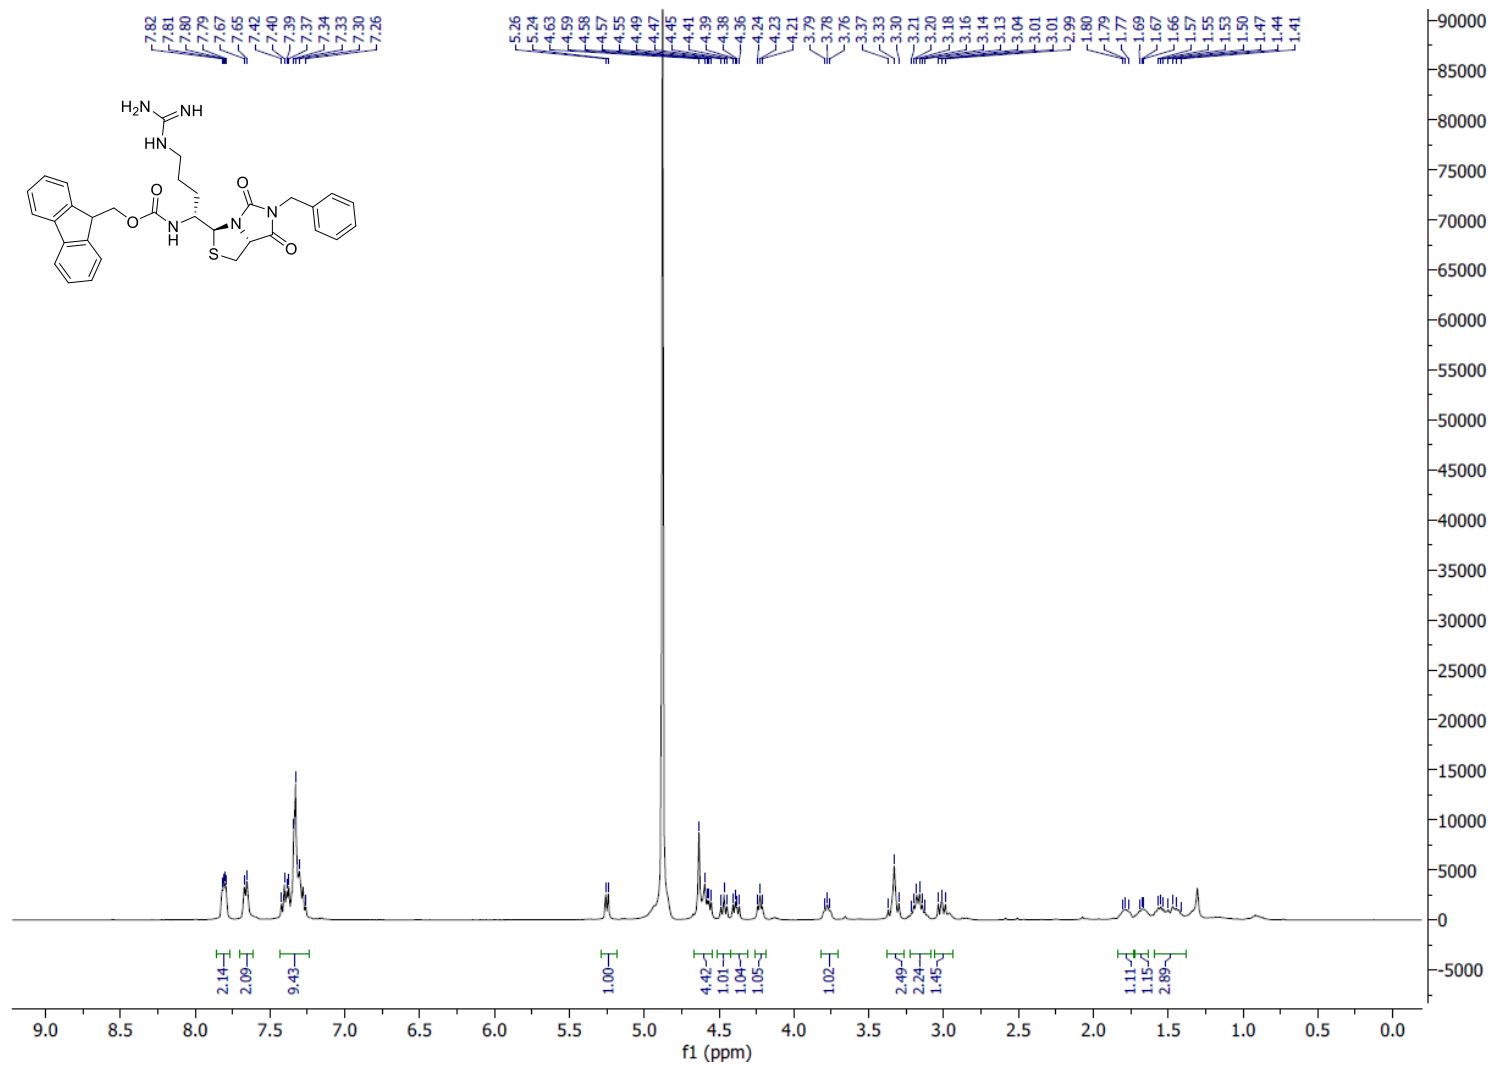

Figure S12: <sup>1</sup>H NMR spectra for compound CPK8

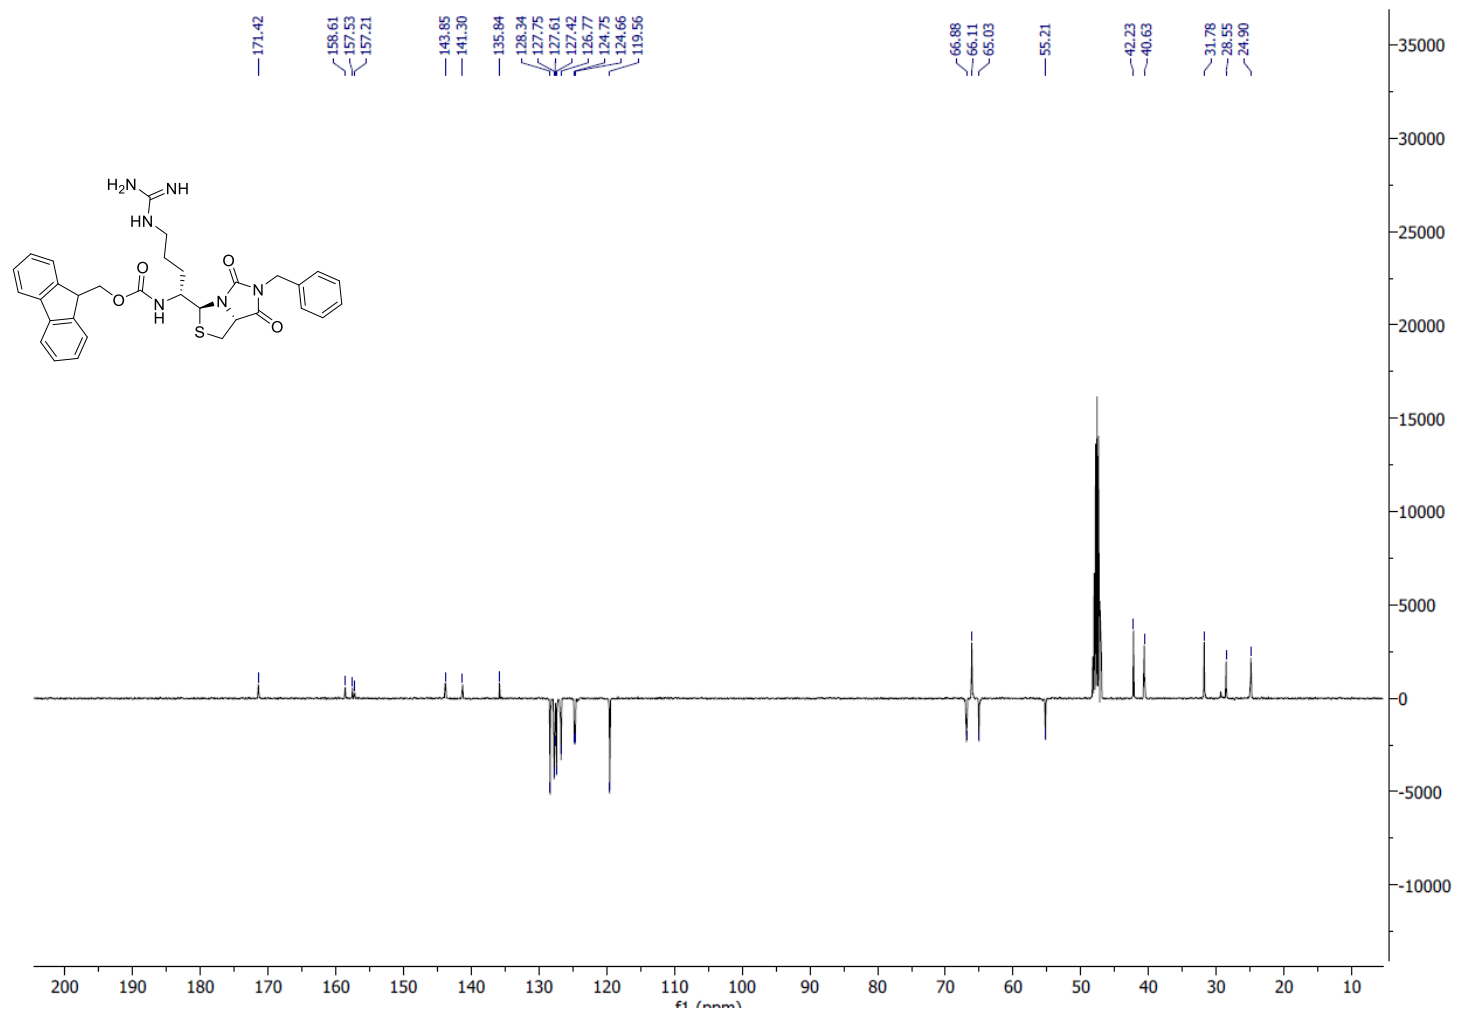

**Figure S13:** qDEPT NMR spectra for compound **CPK8**

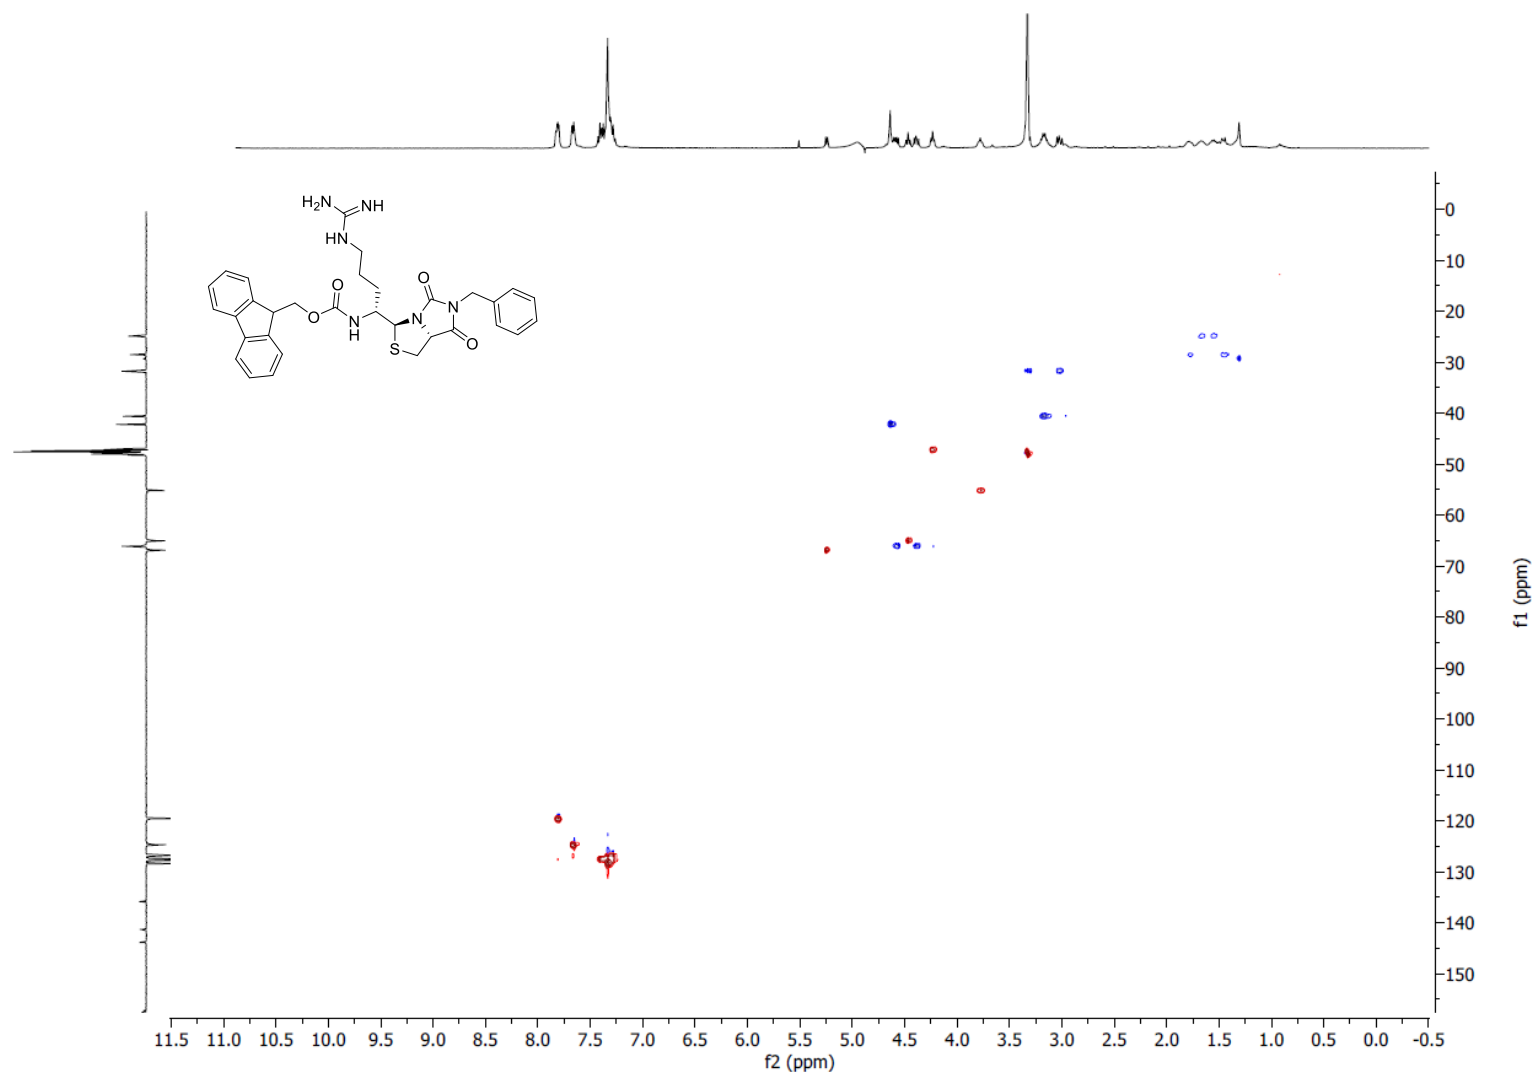

**Figure S14:** HSQC NMR spectra for compound **CPK8**

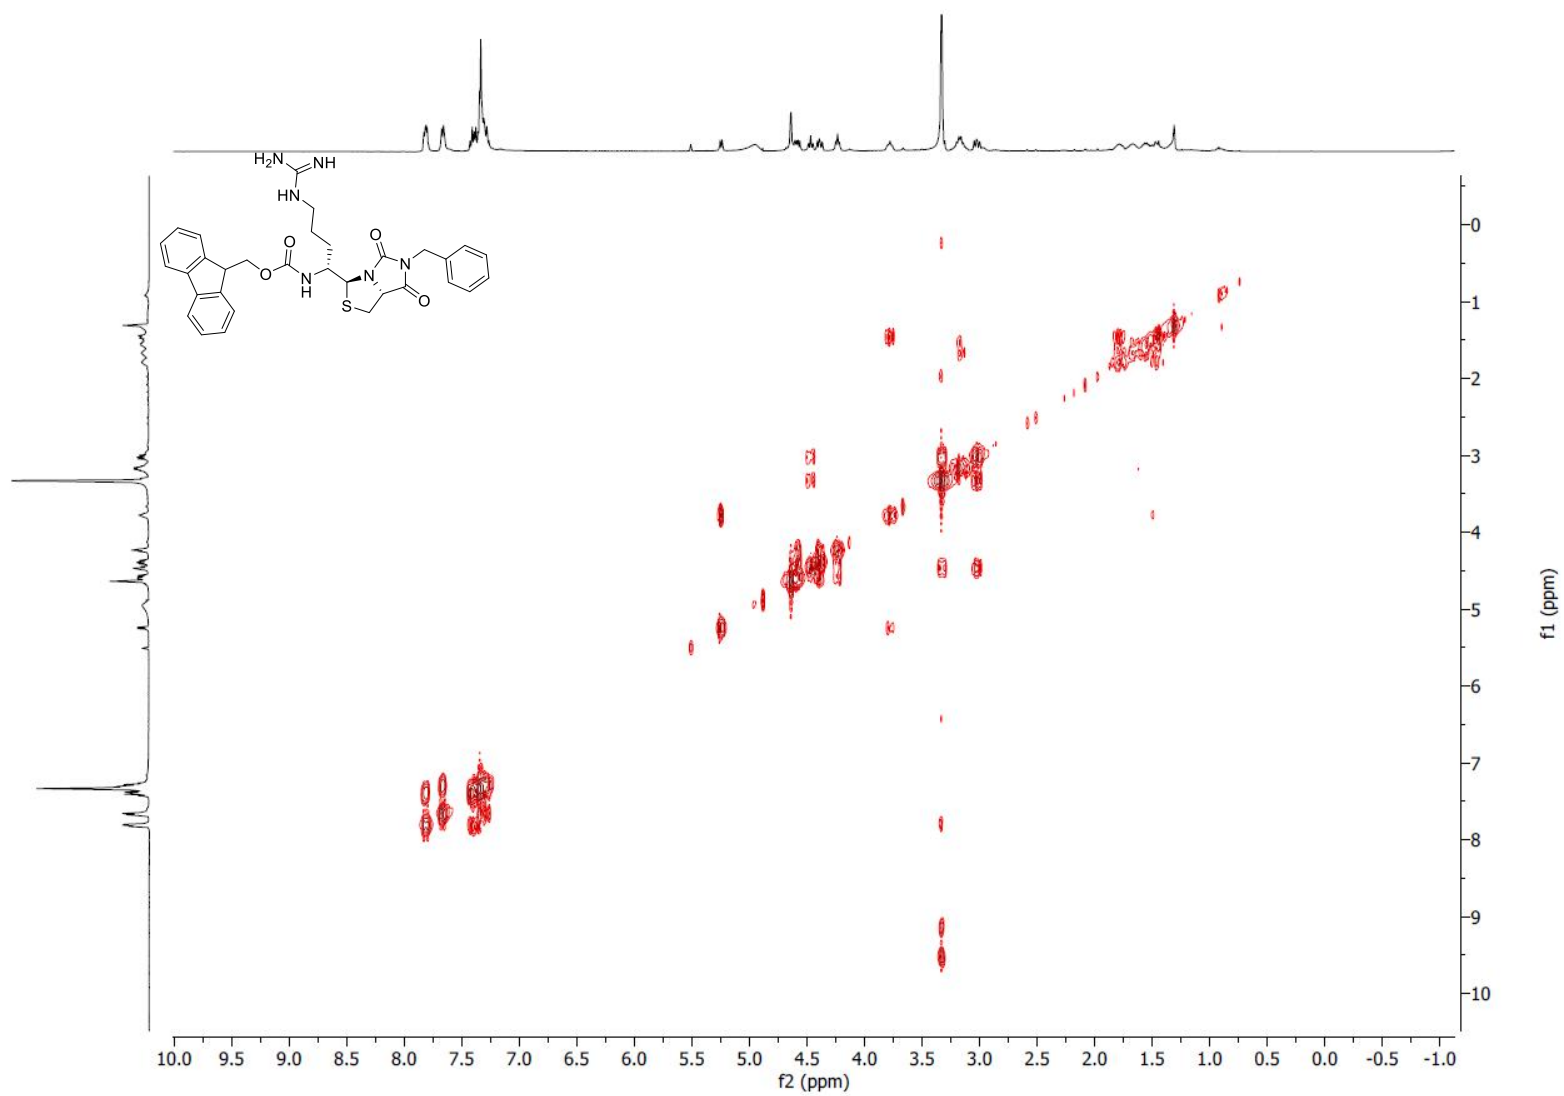

**Figure S15:** COSY NMR spectra for compound CPK8

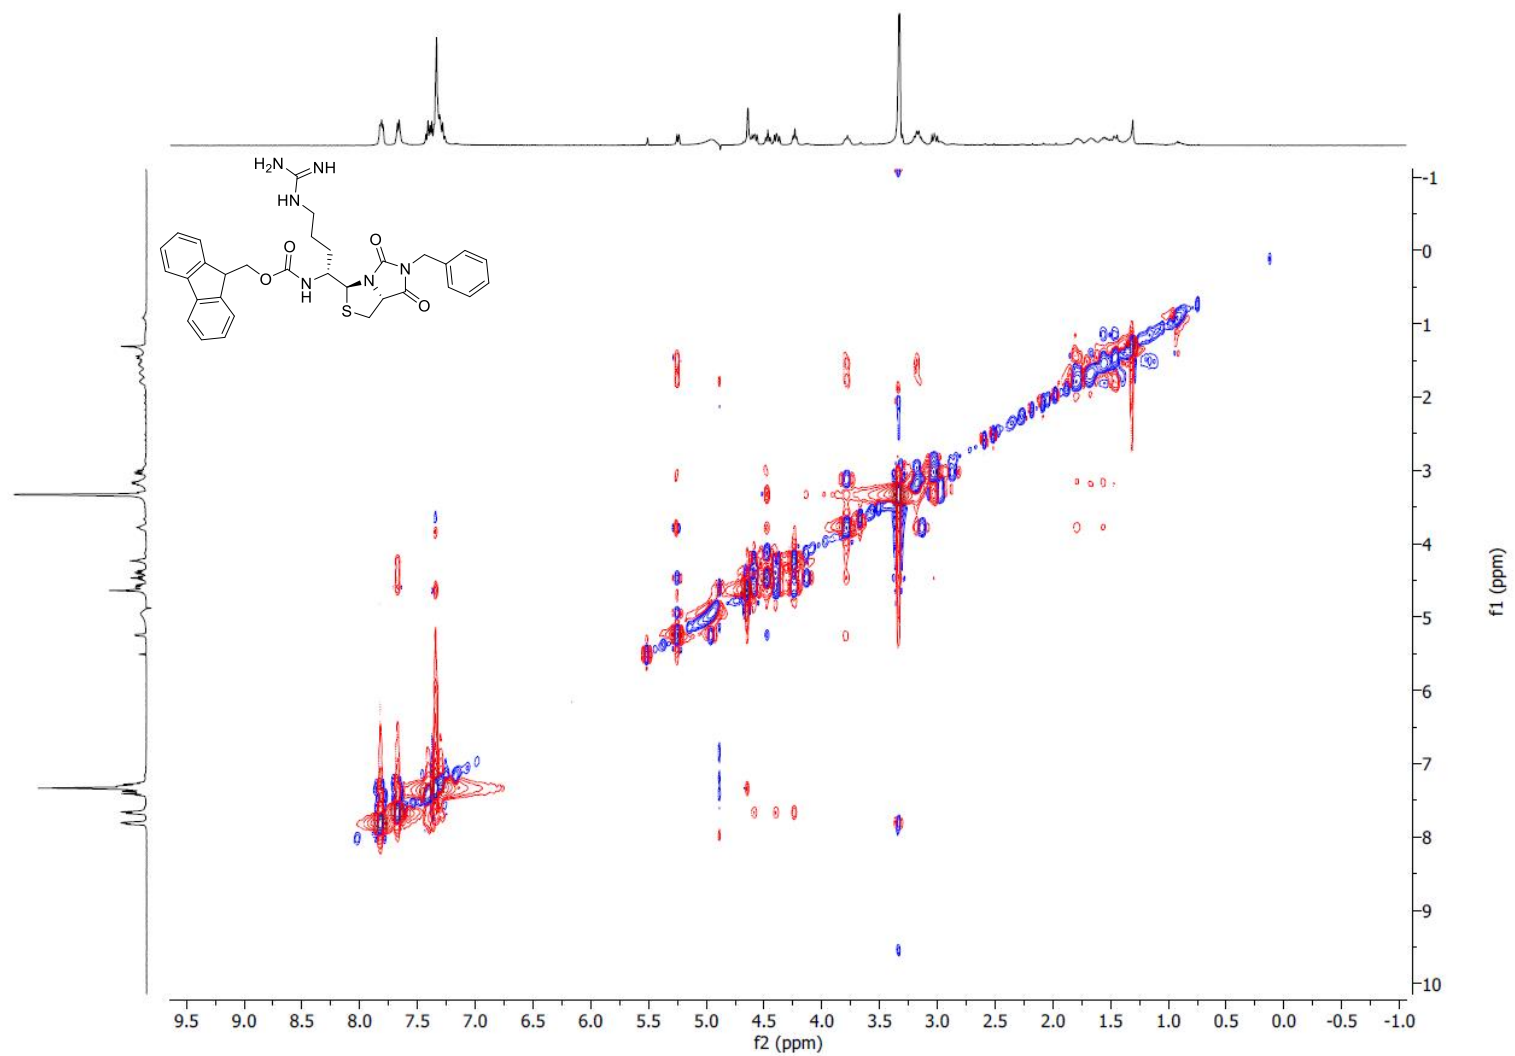

**Figure S16:** ROESY NMR spectra for compound **CPK8**

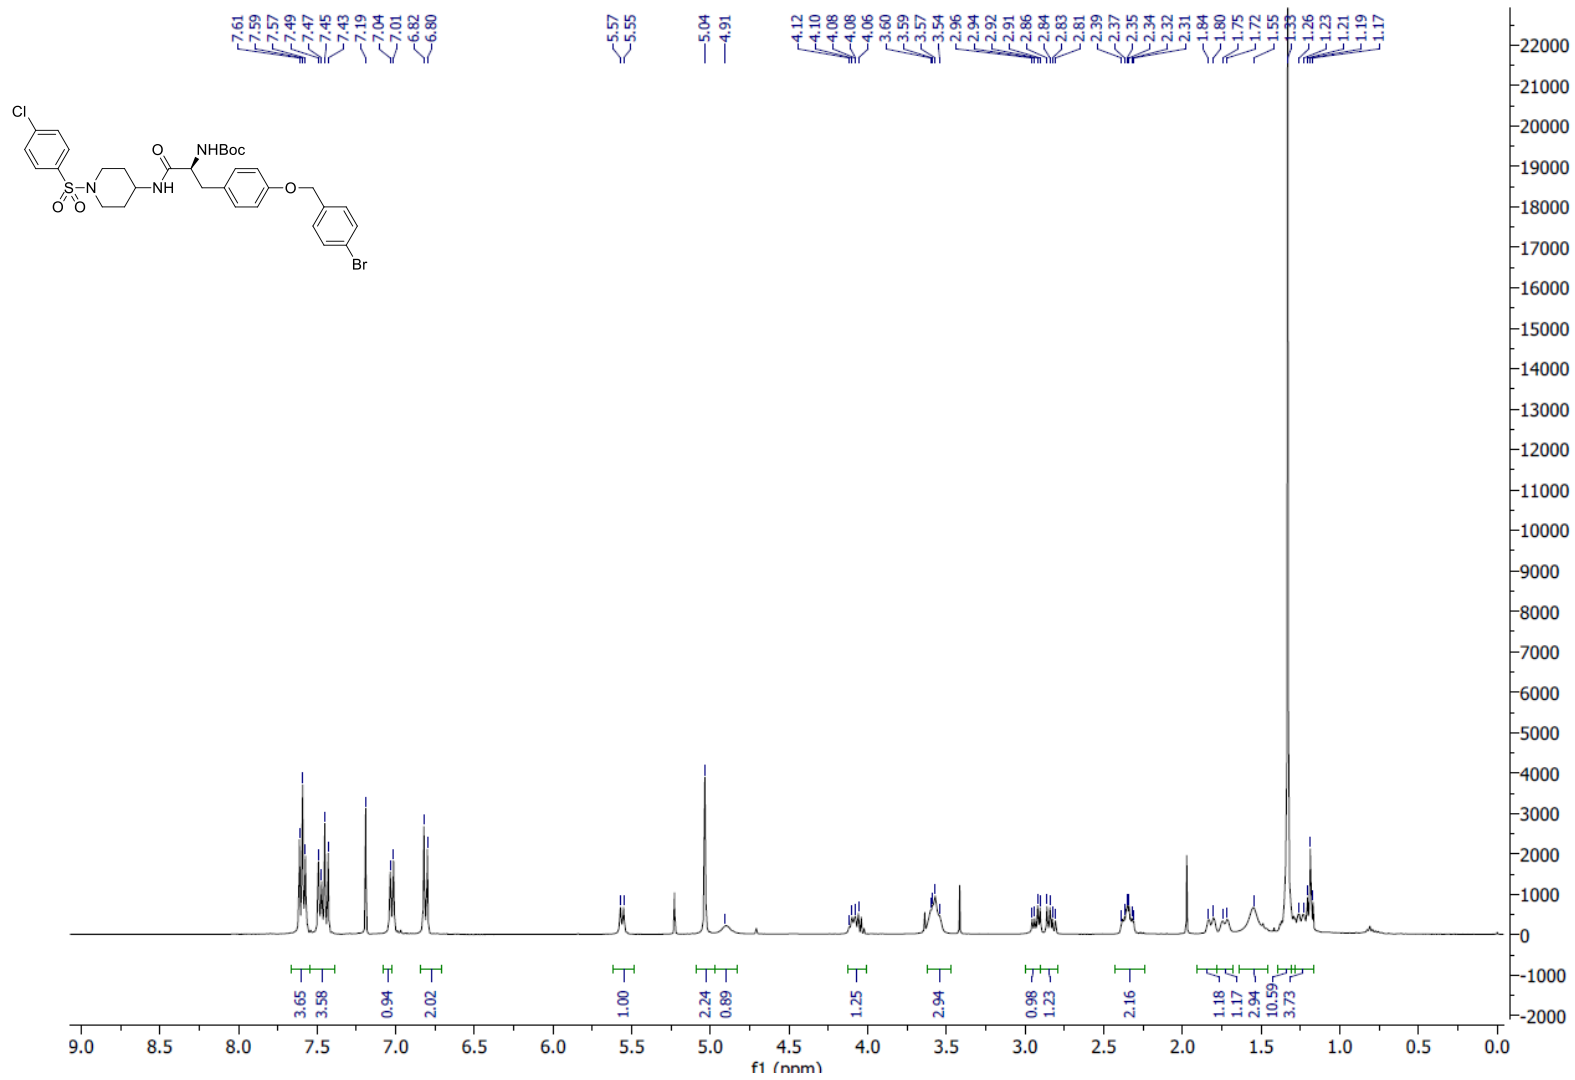

Figure S17: <sup>1</sup>H NMR spectra for compound CPK10



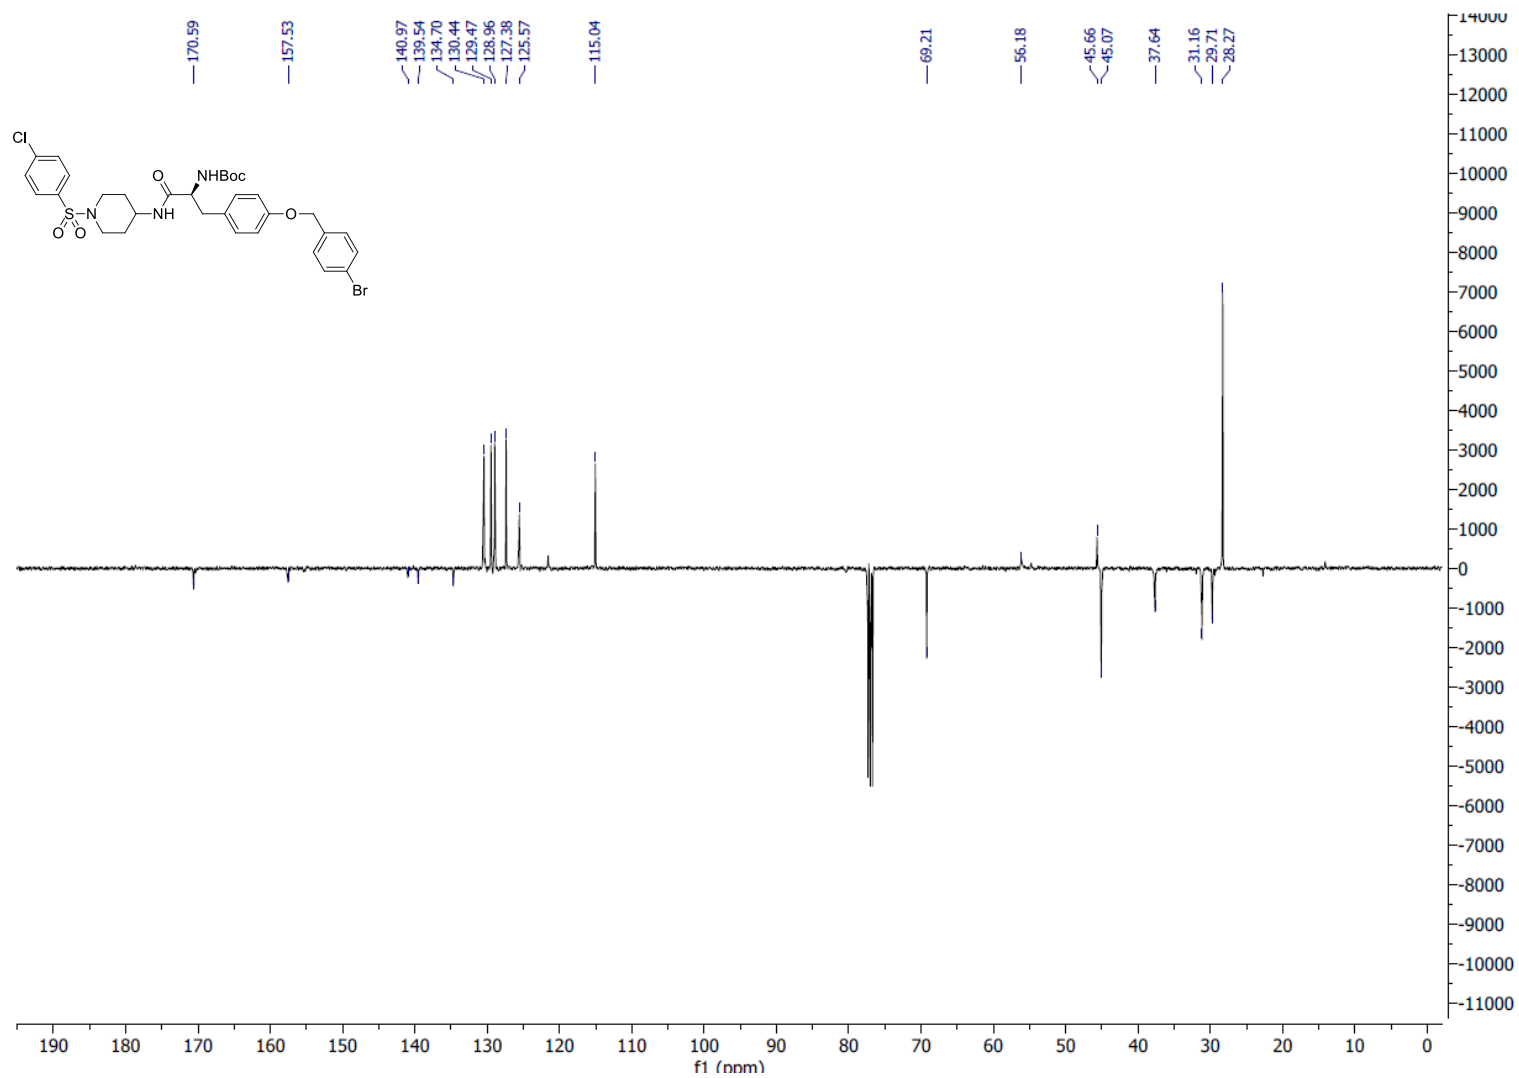

**Figure S18:** qDEPT NMR spectra for compound **CPK10**

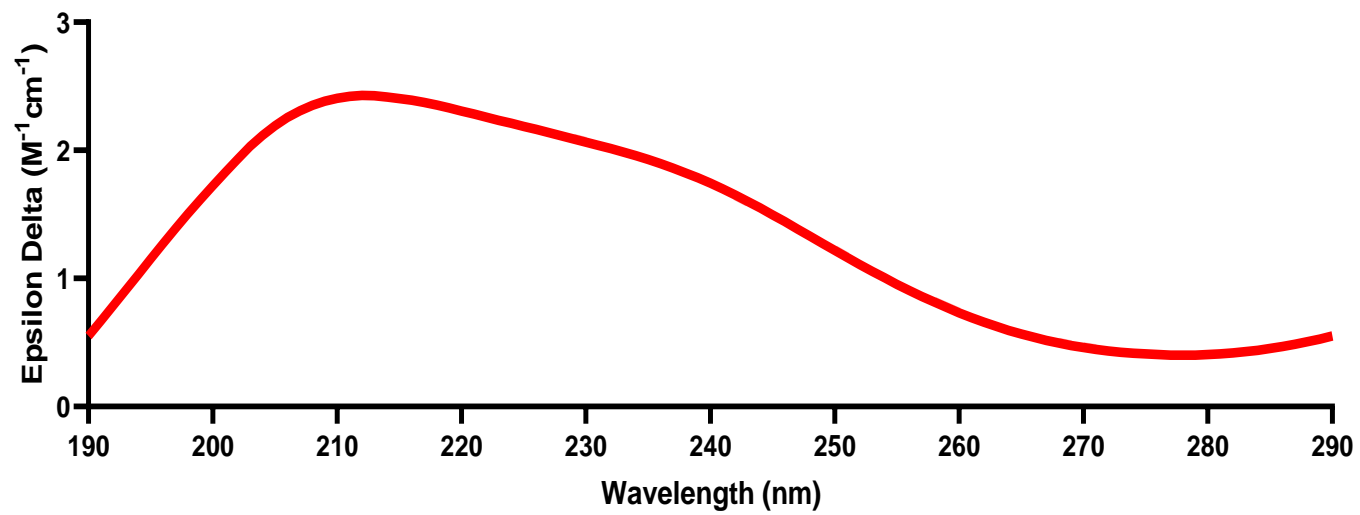

**Figure S19:** CD spectra for compound **CPK10**

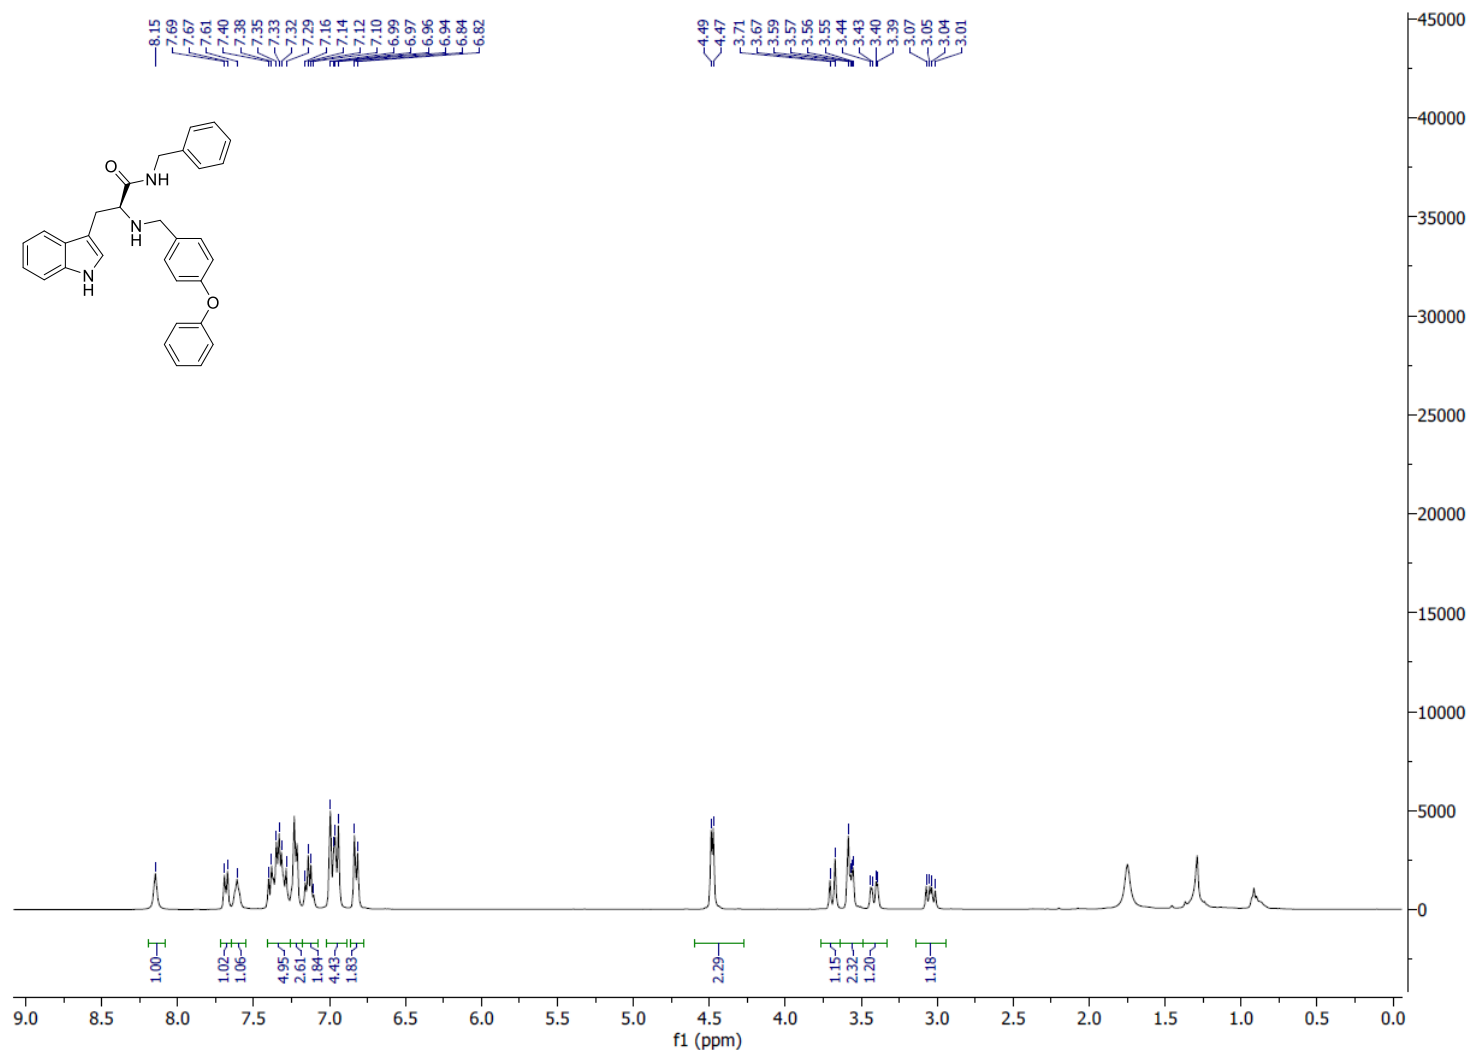

Figure S20: <sup>1</sup>H NMR spectra for compound CPK18

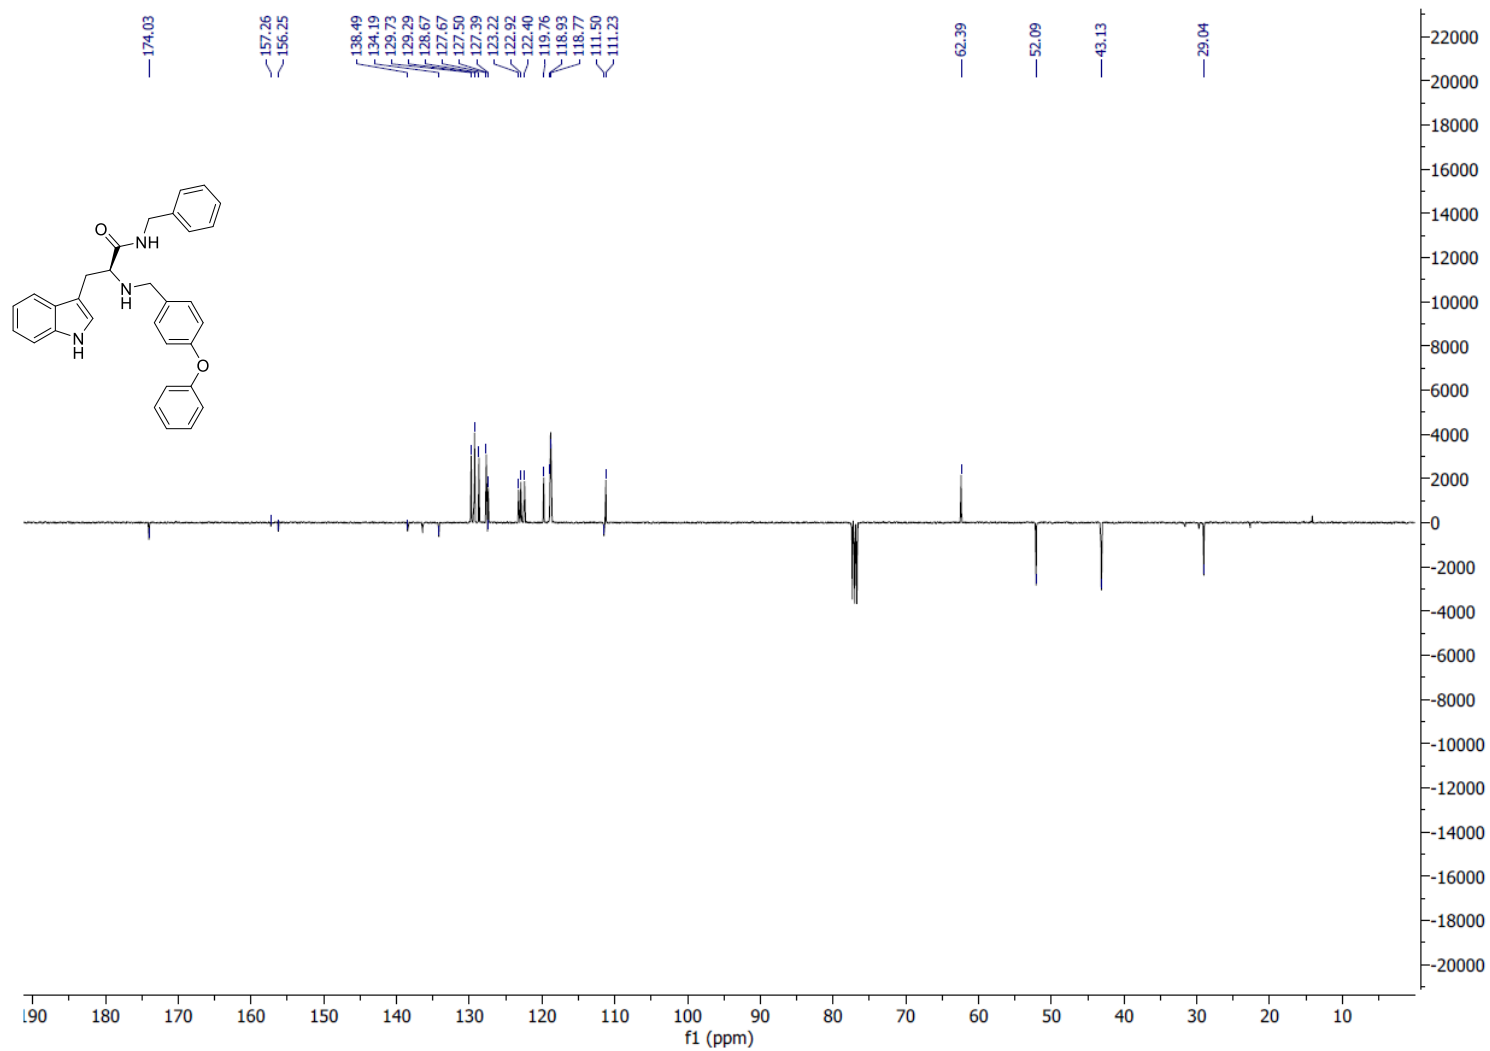

Figure S21: qDEPT NMR spectra for compound CPK18

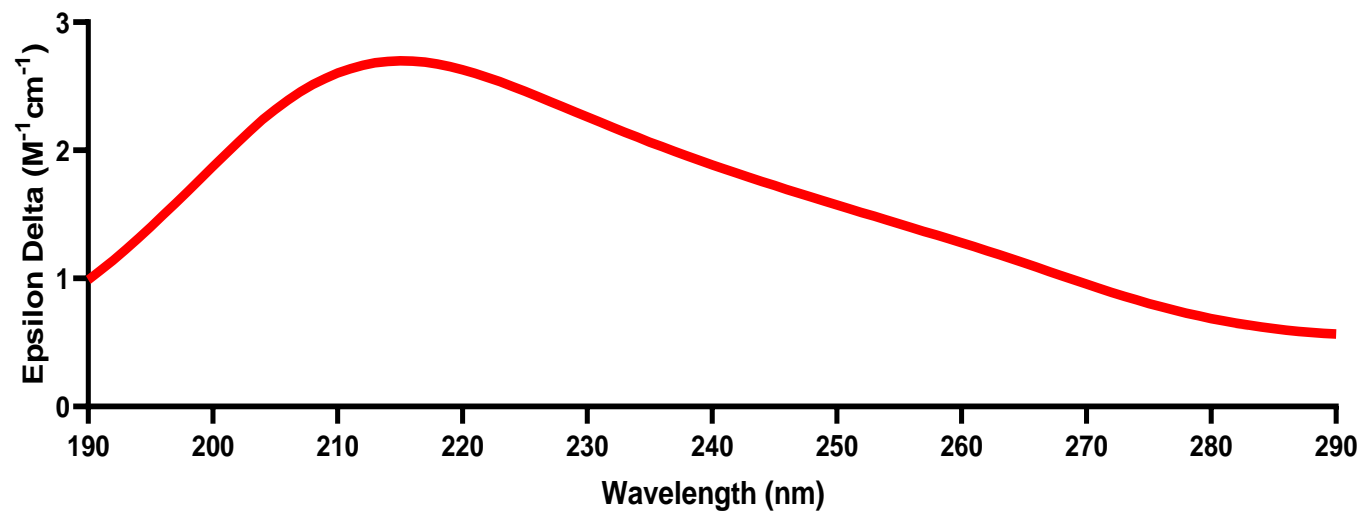

**Figure S22:** CD spectra for compound **CPK5**

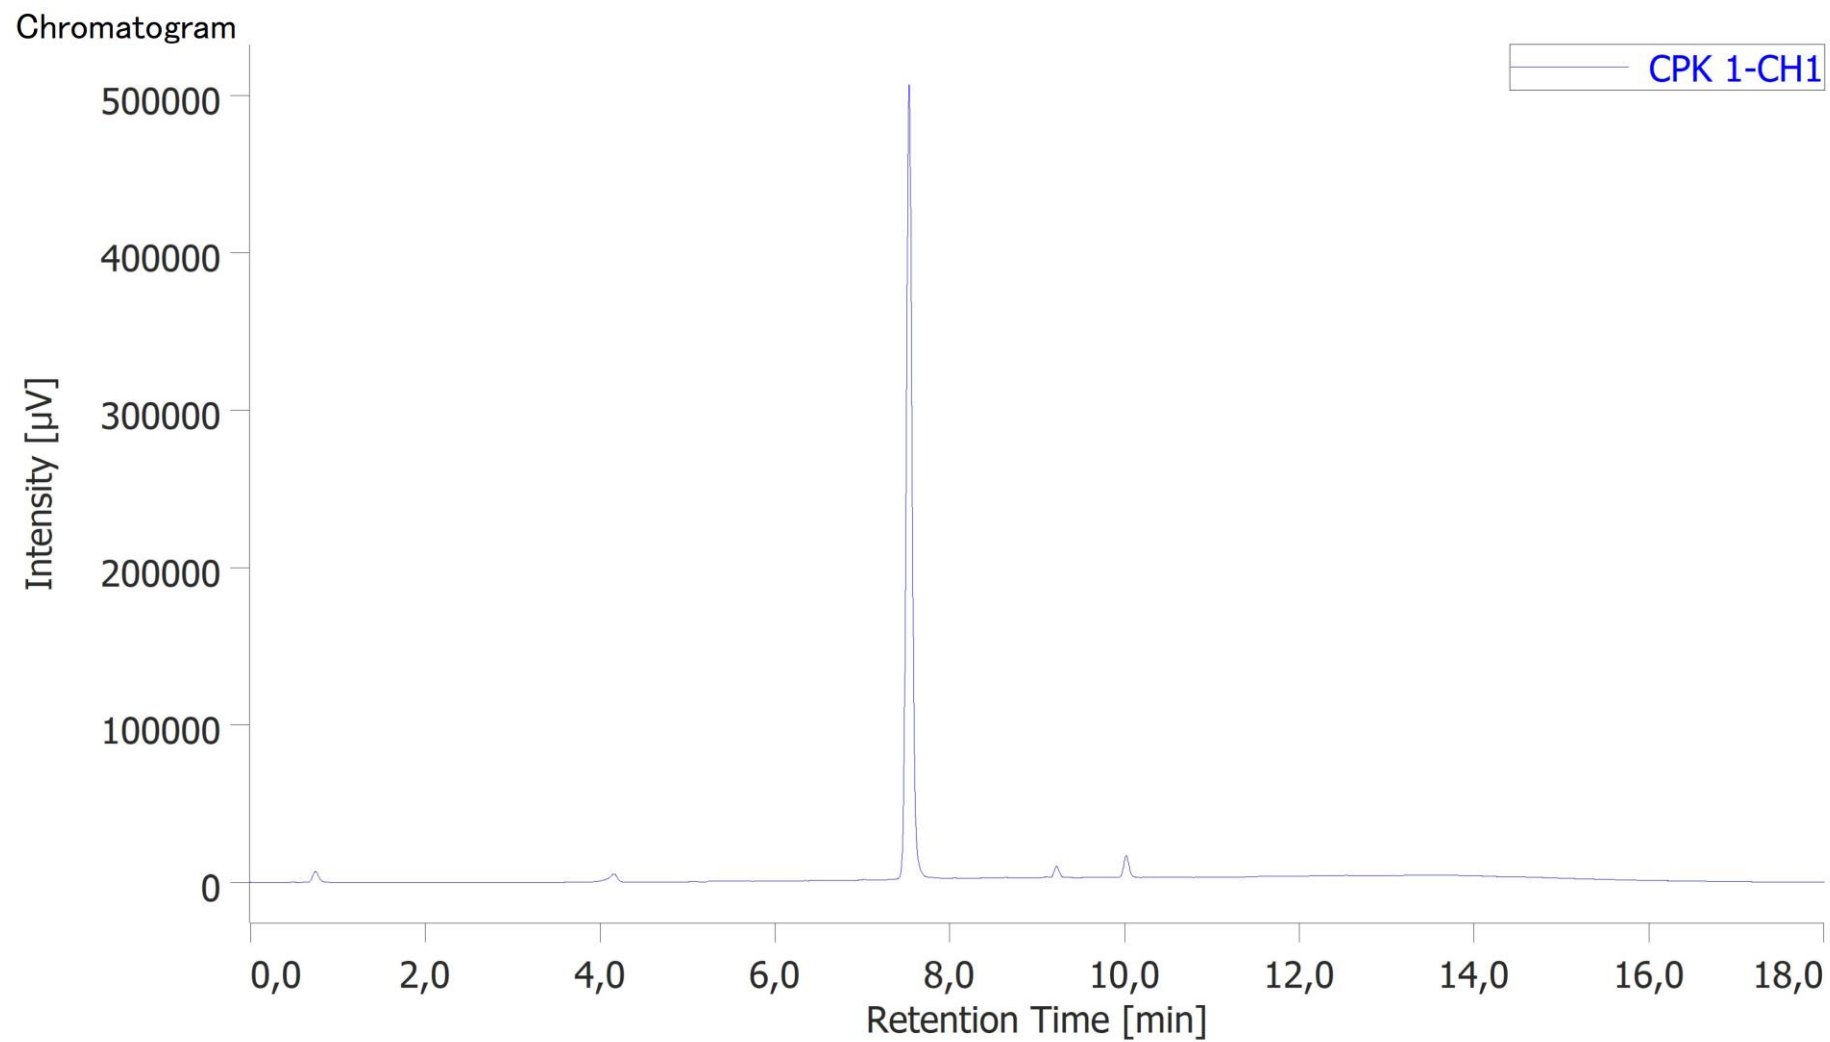

**Figures S23:** HPLC traces of compound **CPK1**

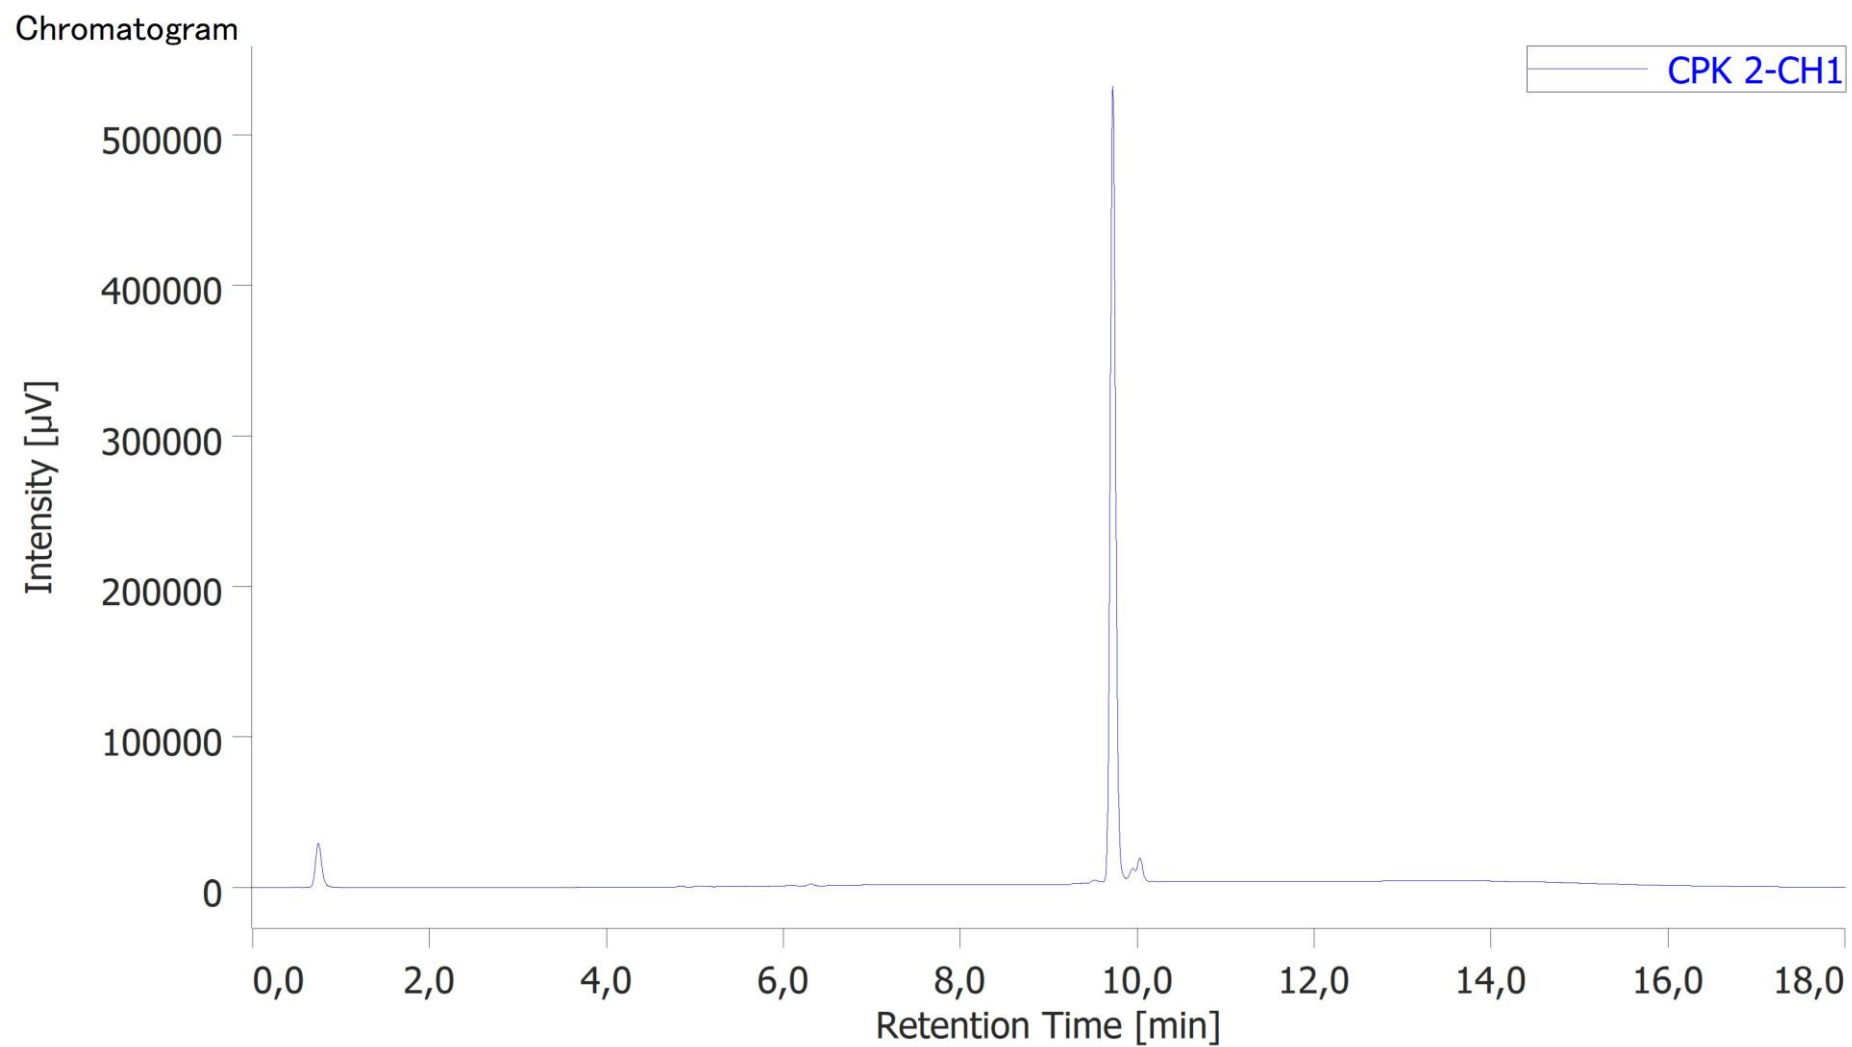

**Figures S24:** HPLC traces of compound **CPK2**

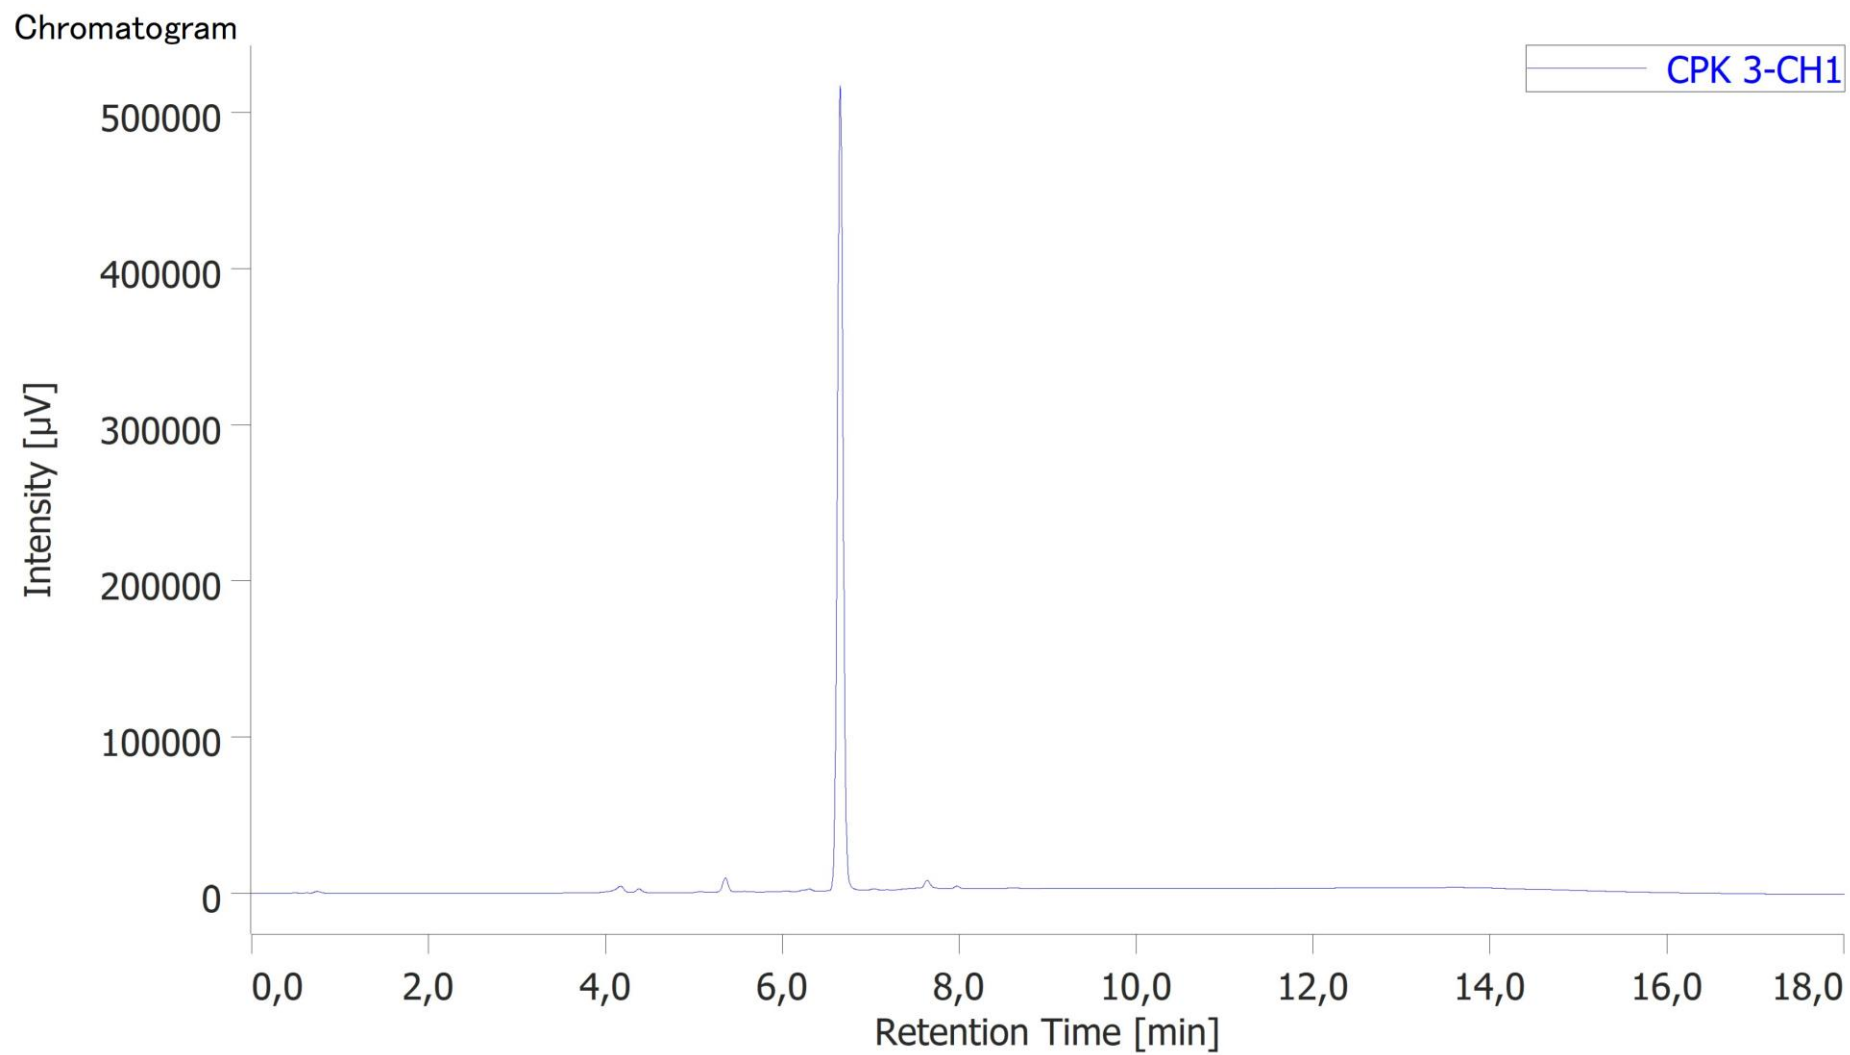

Figures S25: HPLC traces of compound CPK3



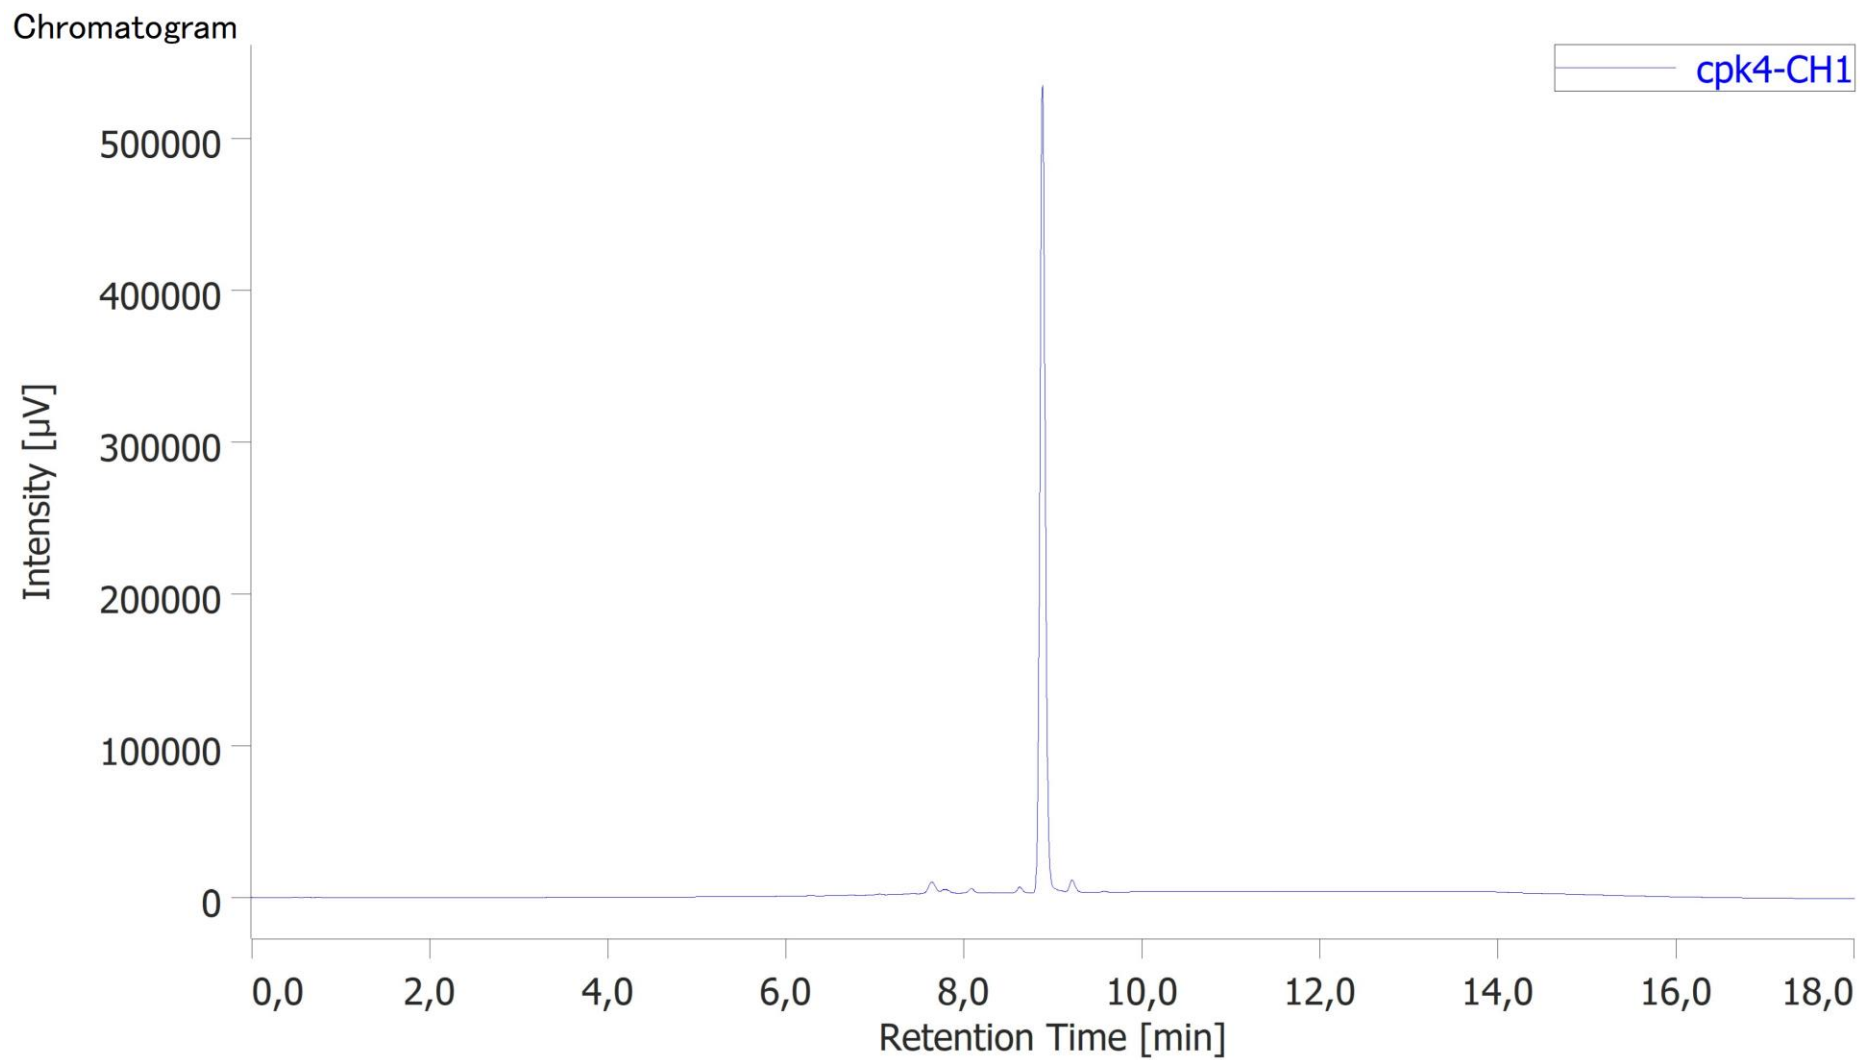

**Figures S26:** HPLC traces of compound **CPK4**

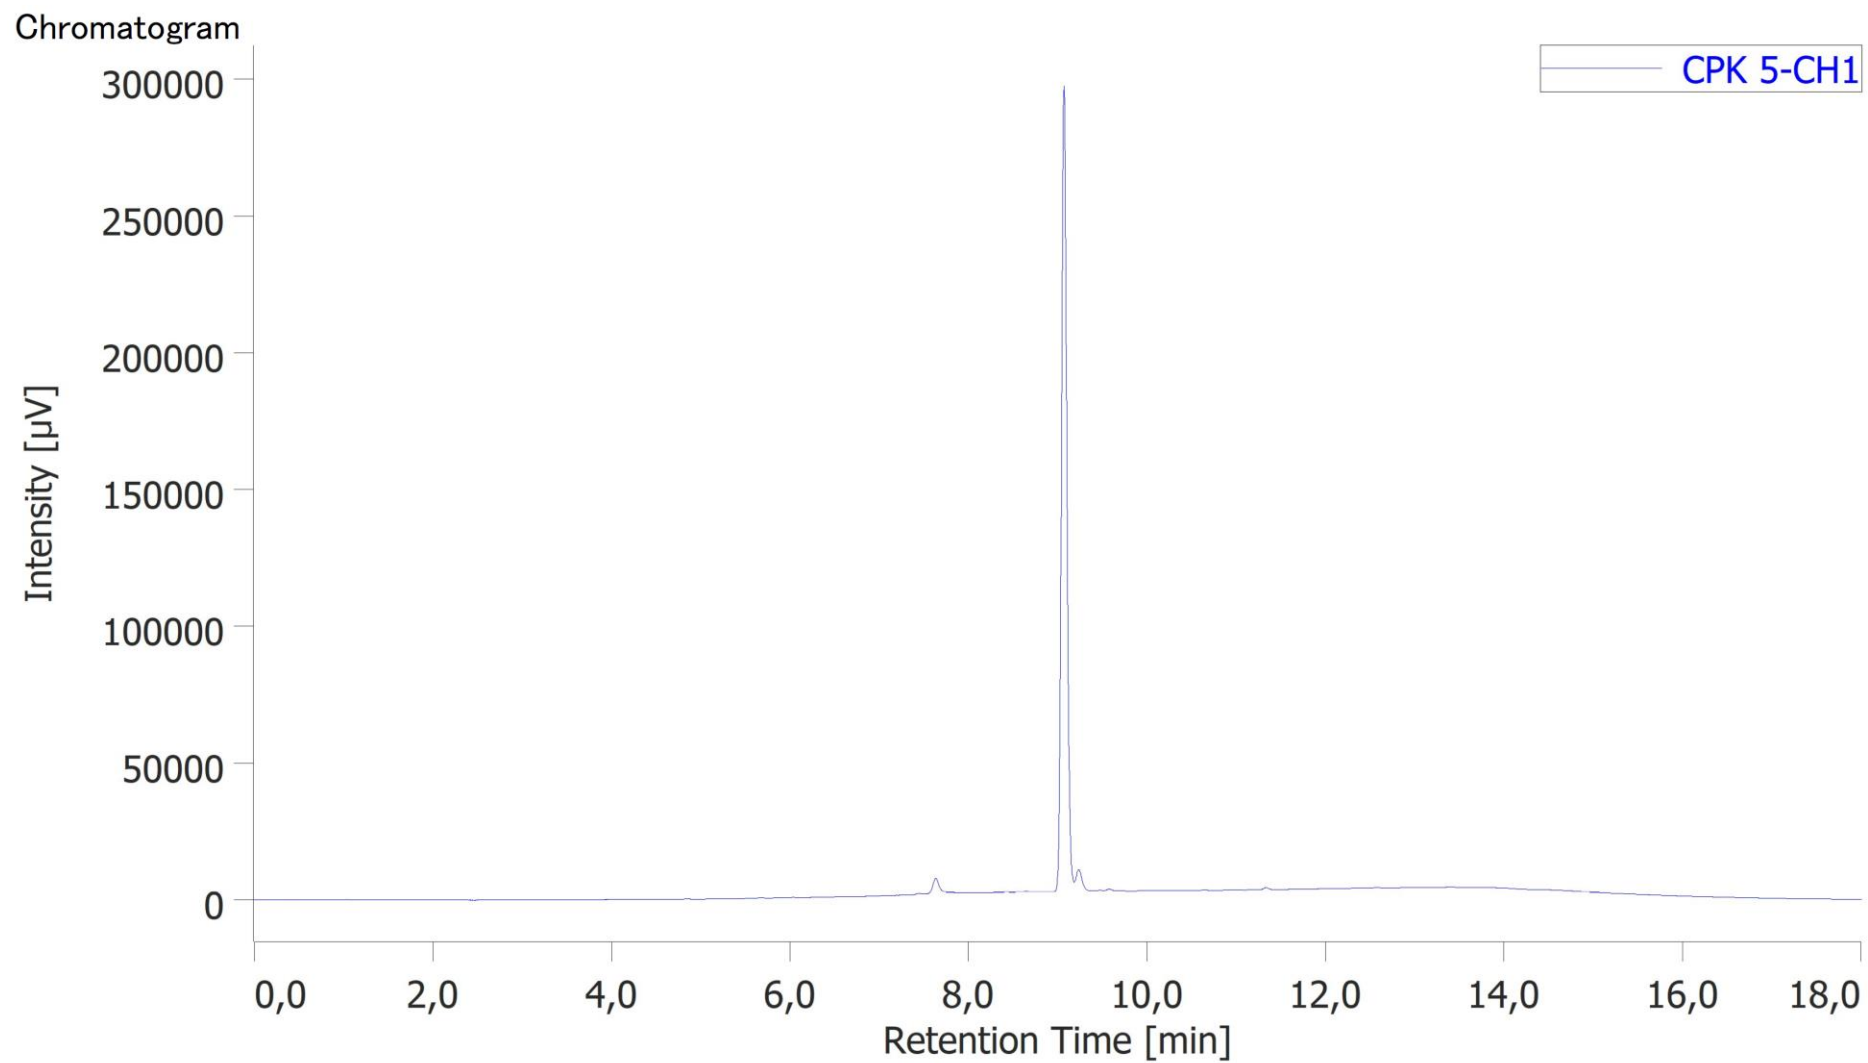

**Figures S27:** HPLC traces of compound **CPK5**

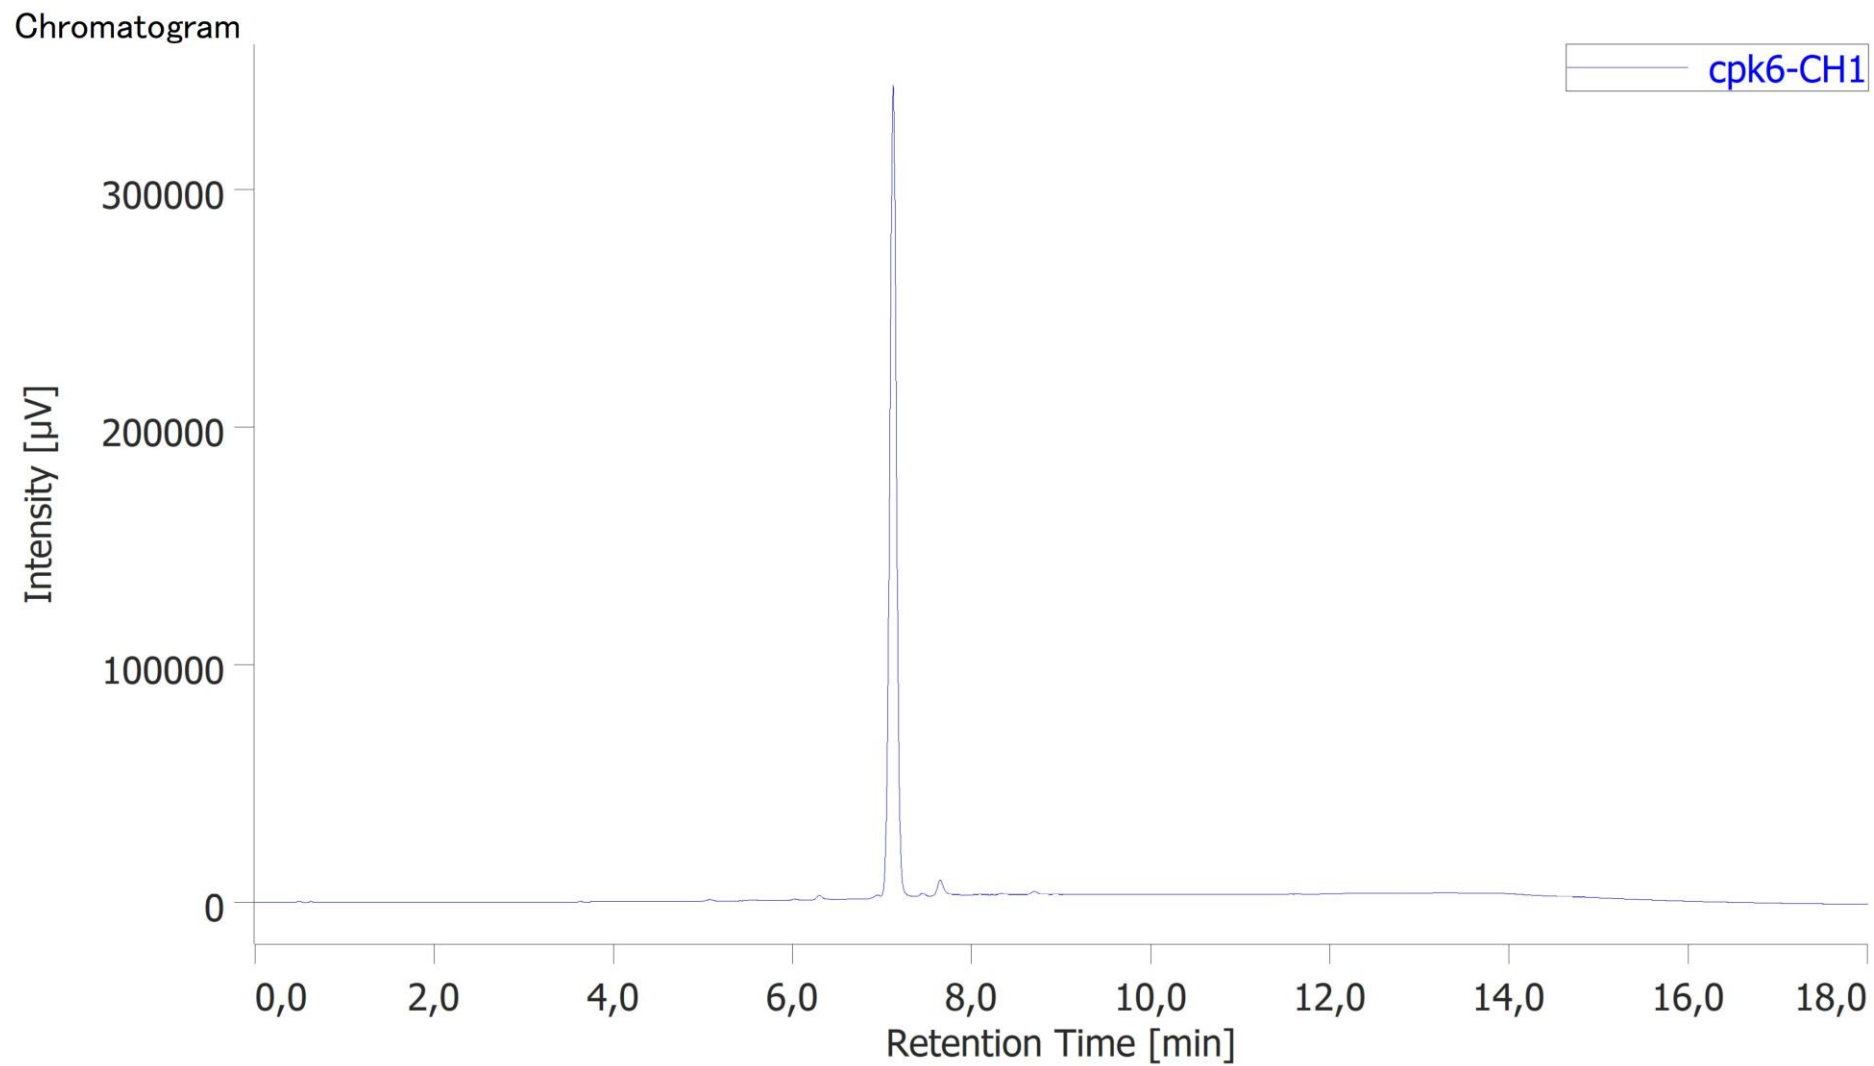

**Figures S28:** HPLC traces of compound **CPK6**

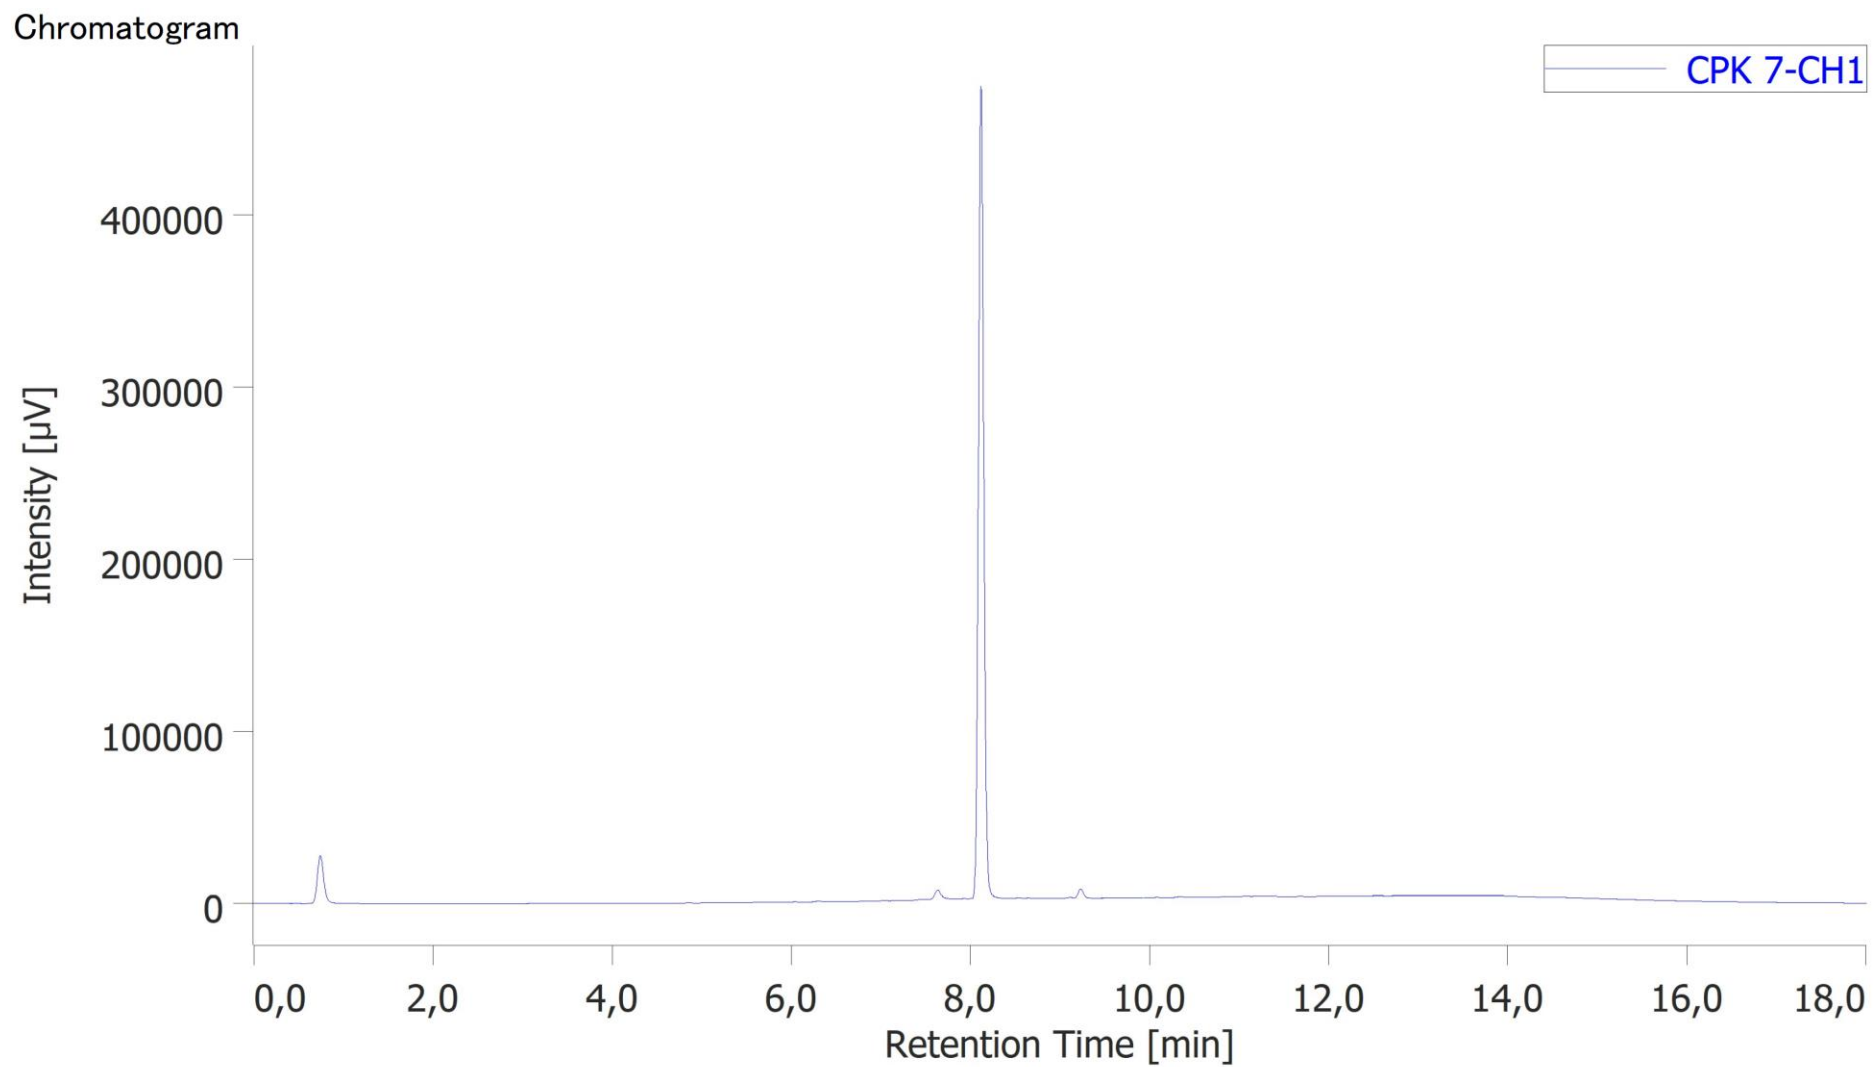

**Figures S29:** HPLC traces of compound **CPK7**

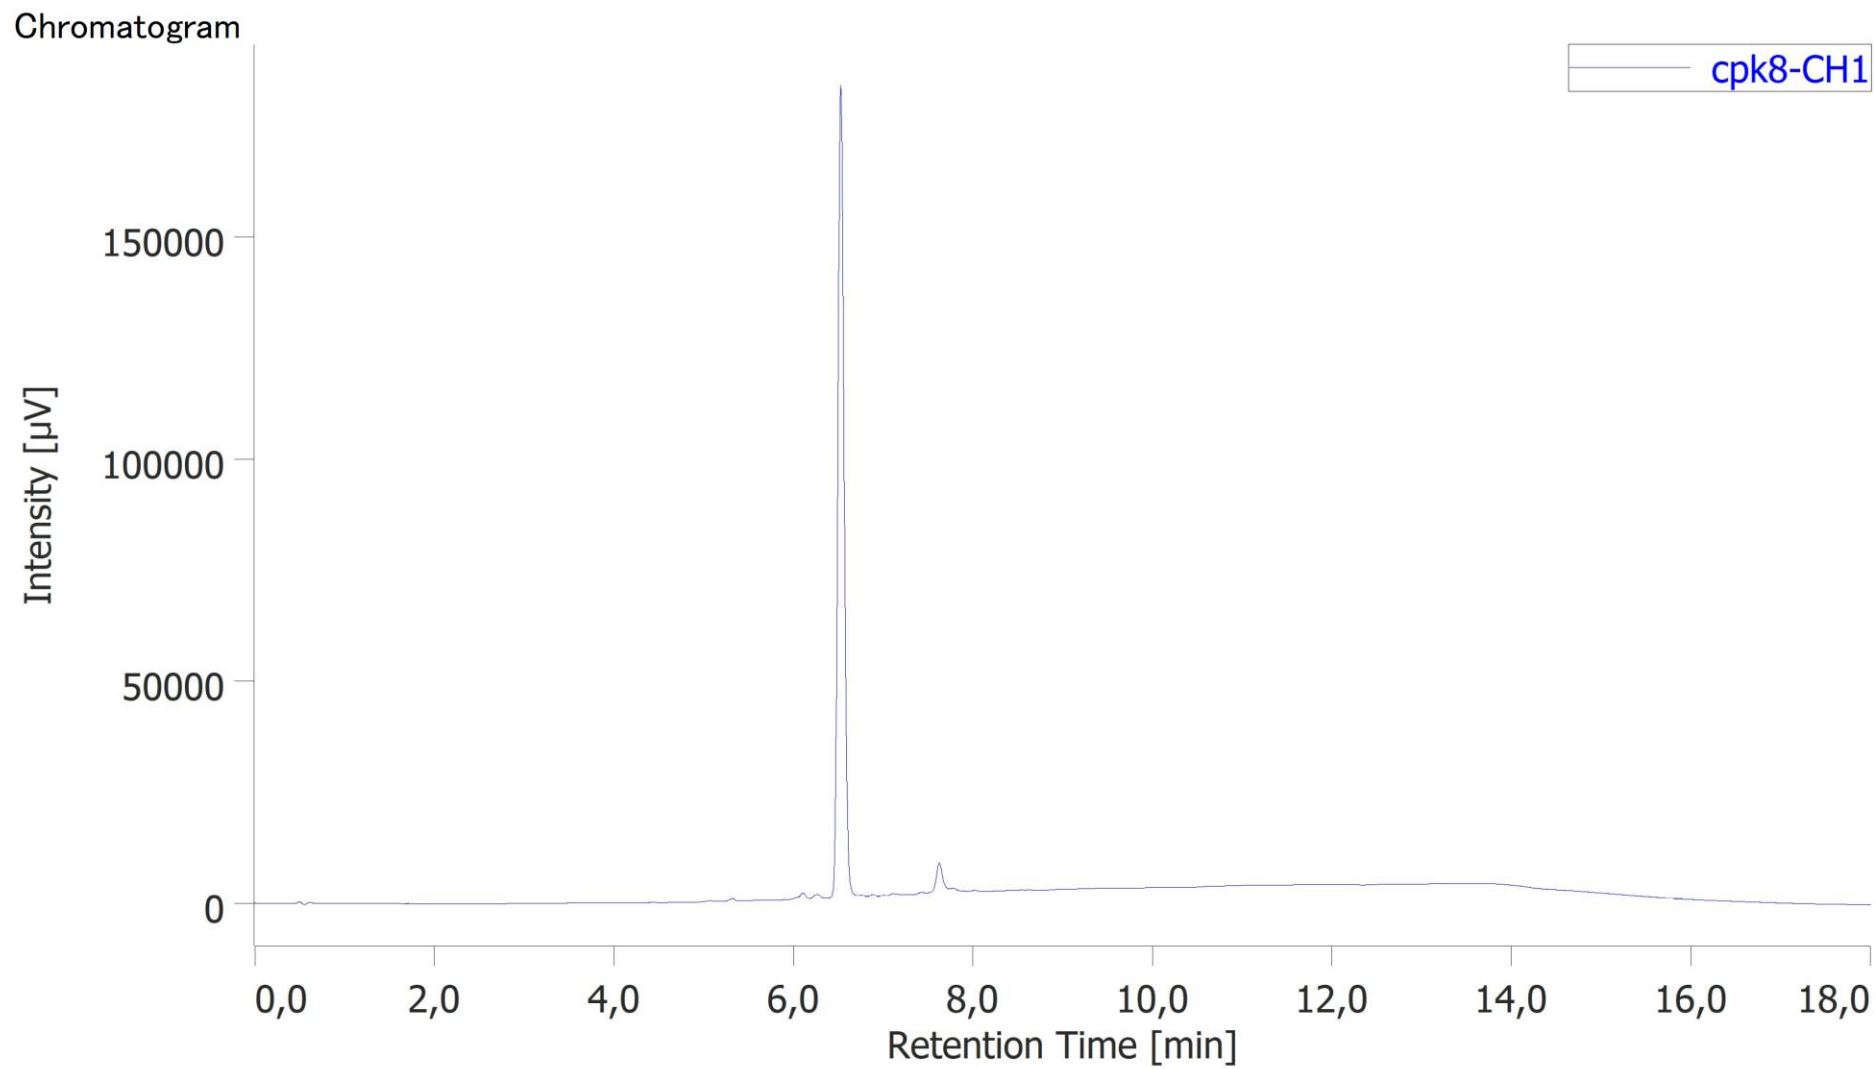

**Figures S30:** HPLC traces of compound **CPK8**

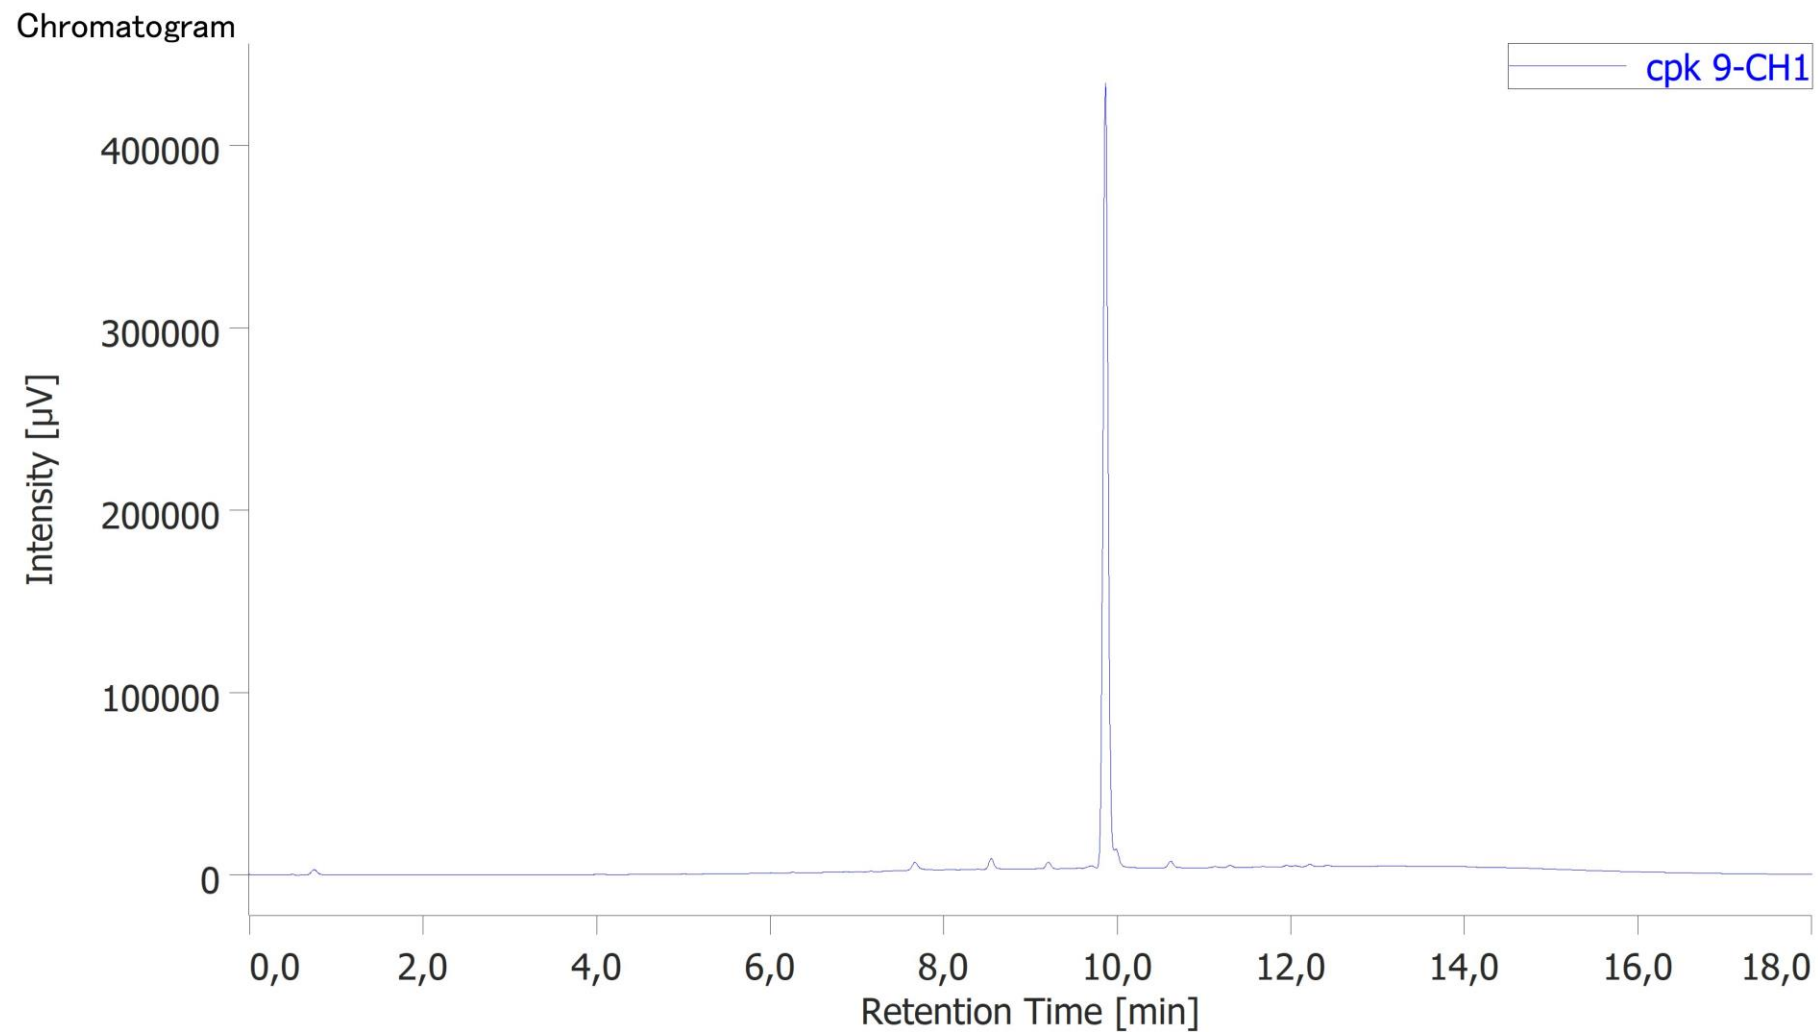

Figures S31: HPLC traces of compound **CPK9**

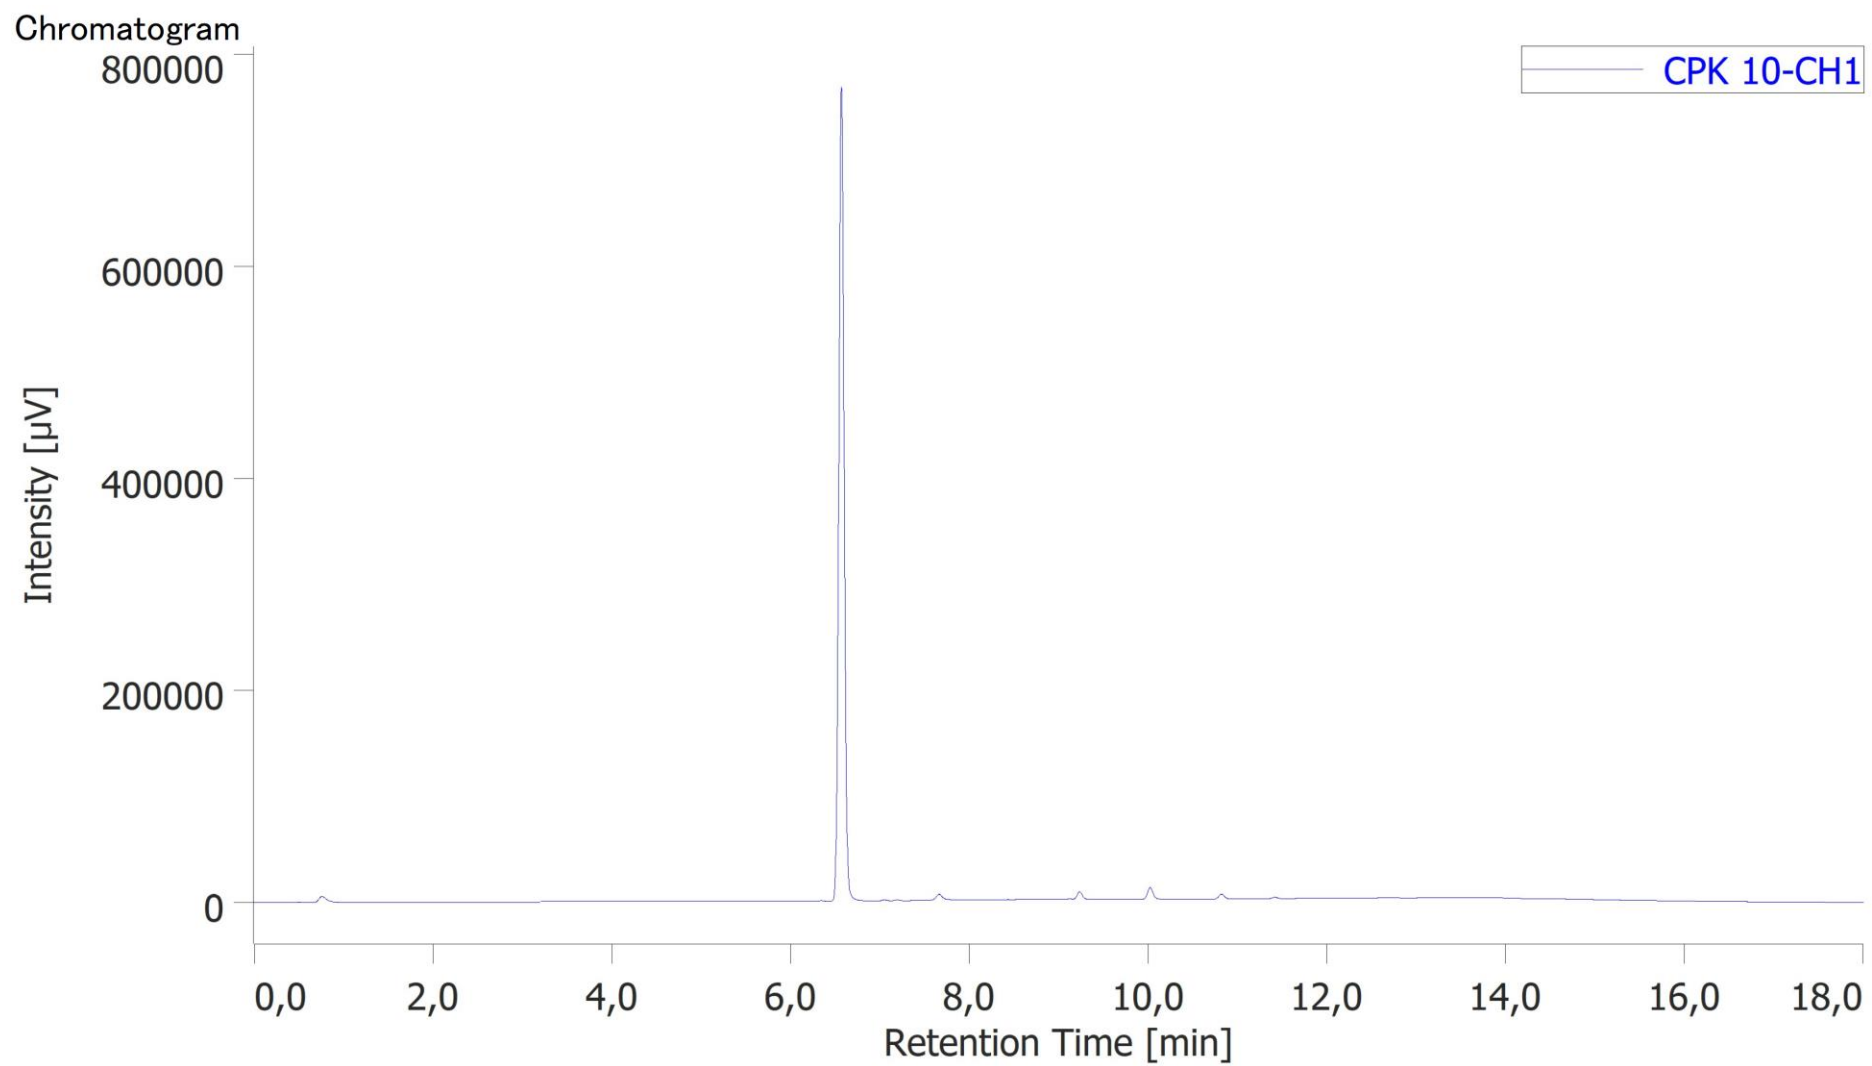

Figures S32: HPLC traces of compound **CPK10**

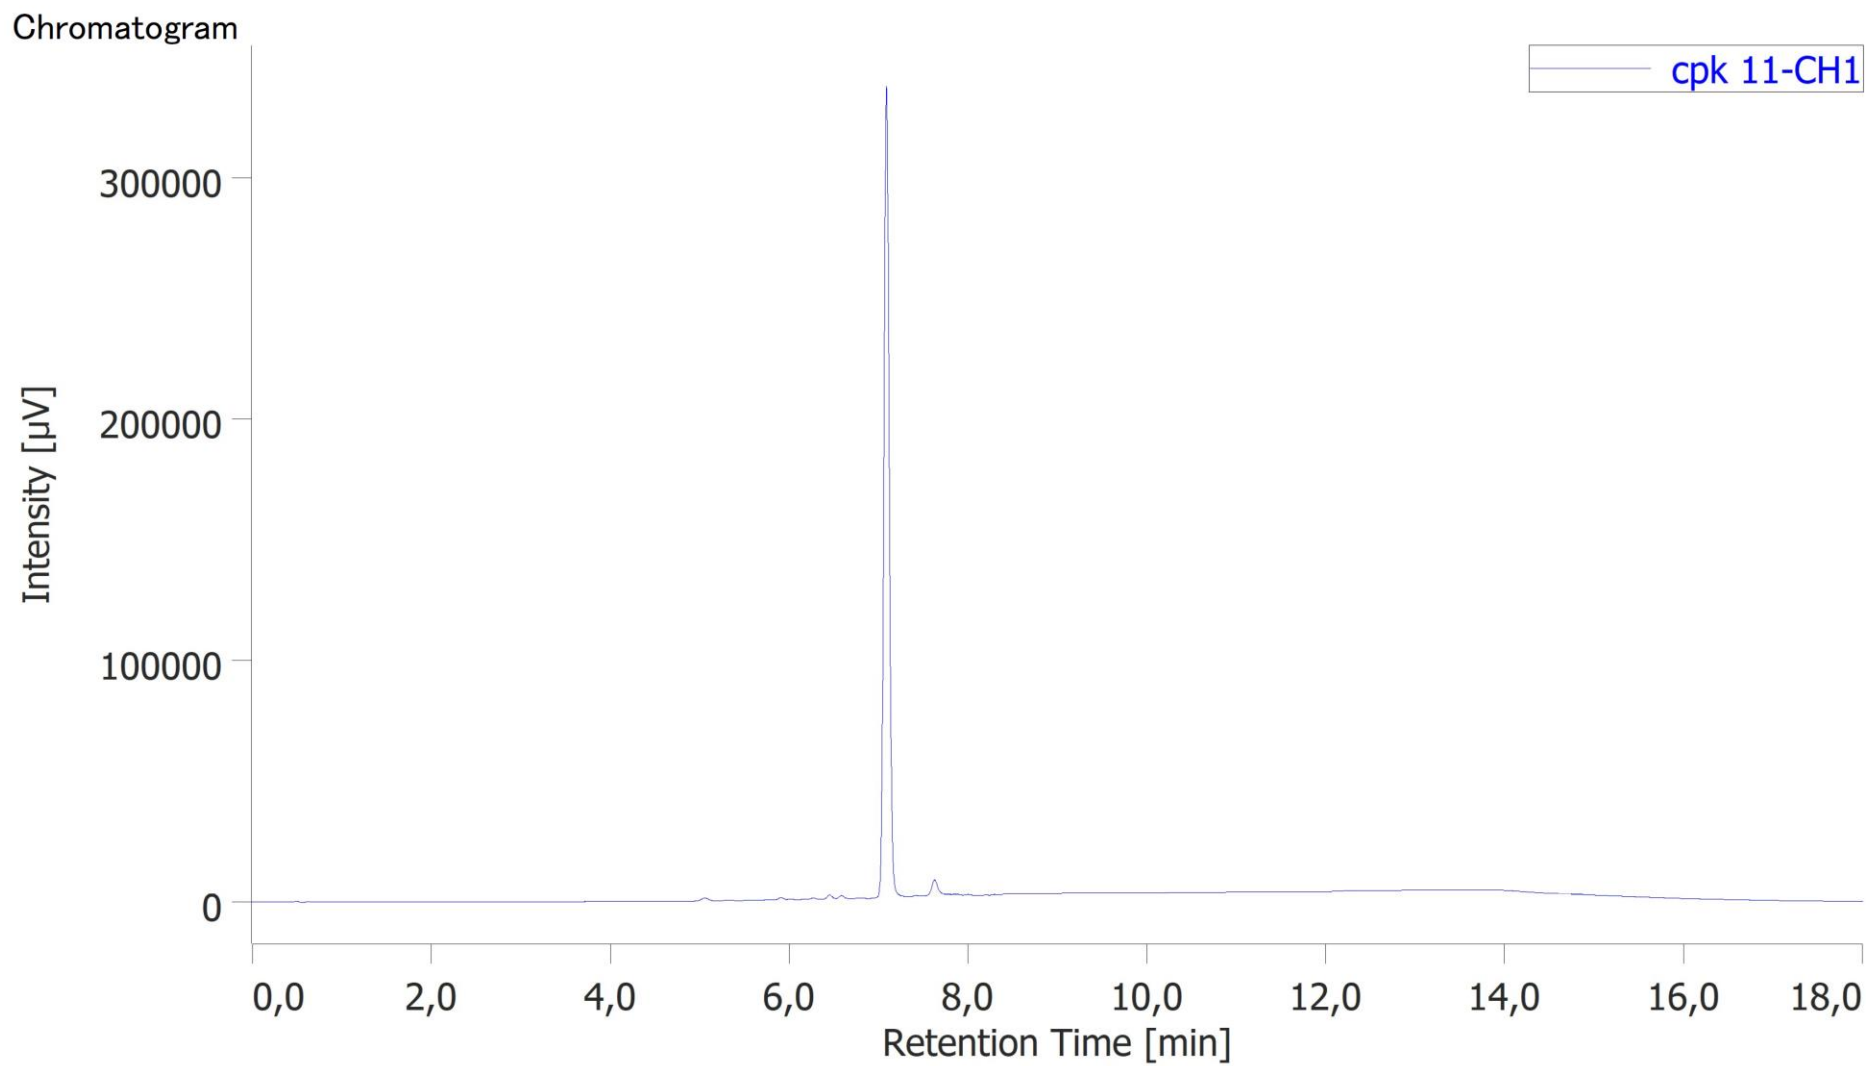

Figures S33: HPLC traces of compound **CPK11**



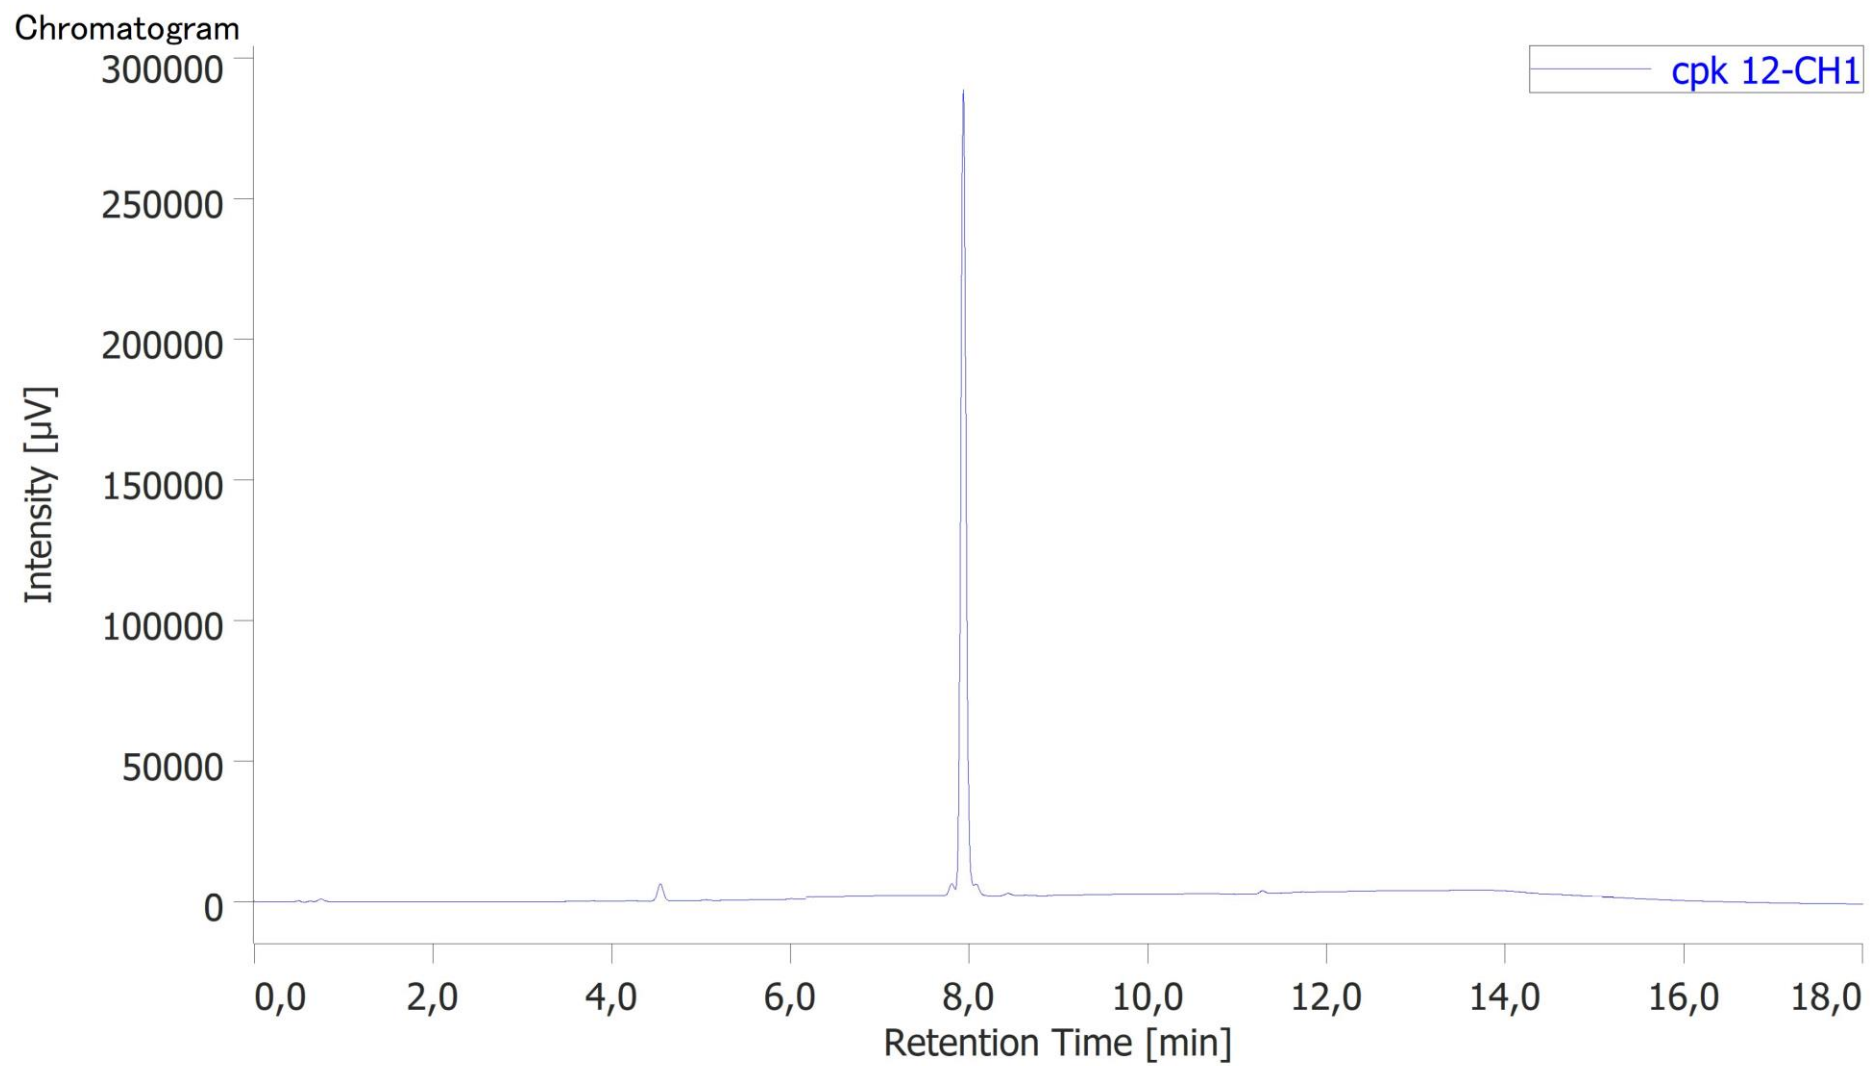

Figures S34: HPLC traces of compound CPK12

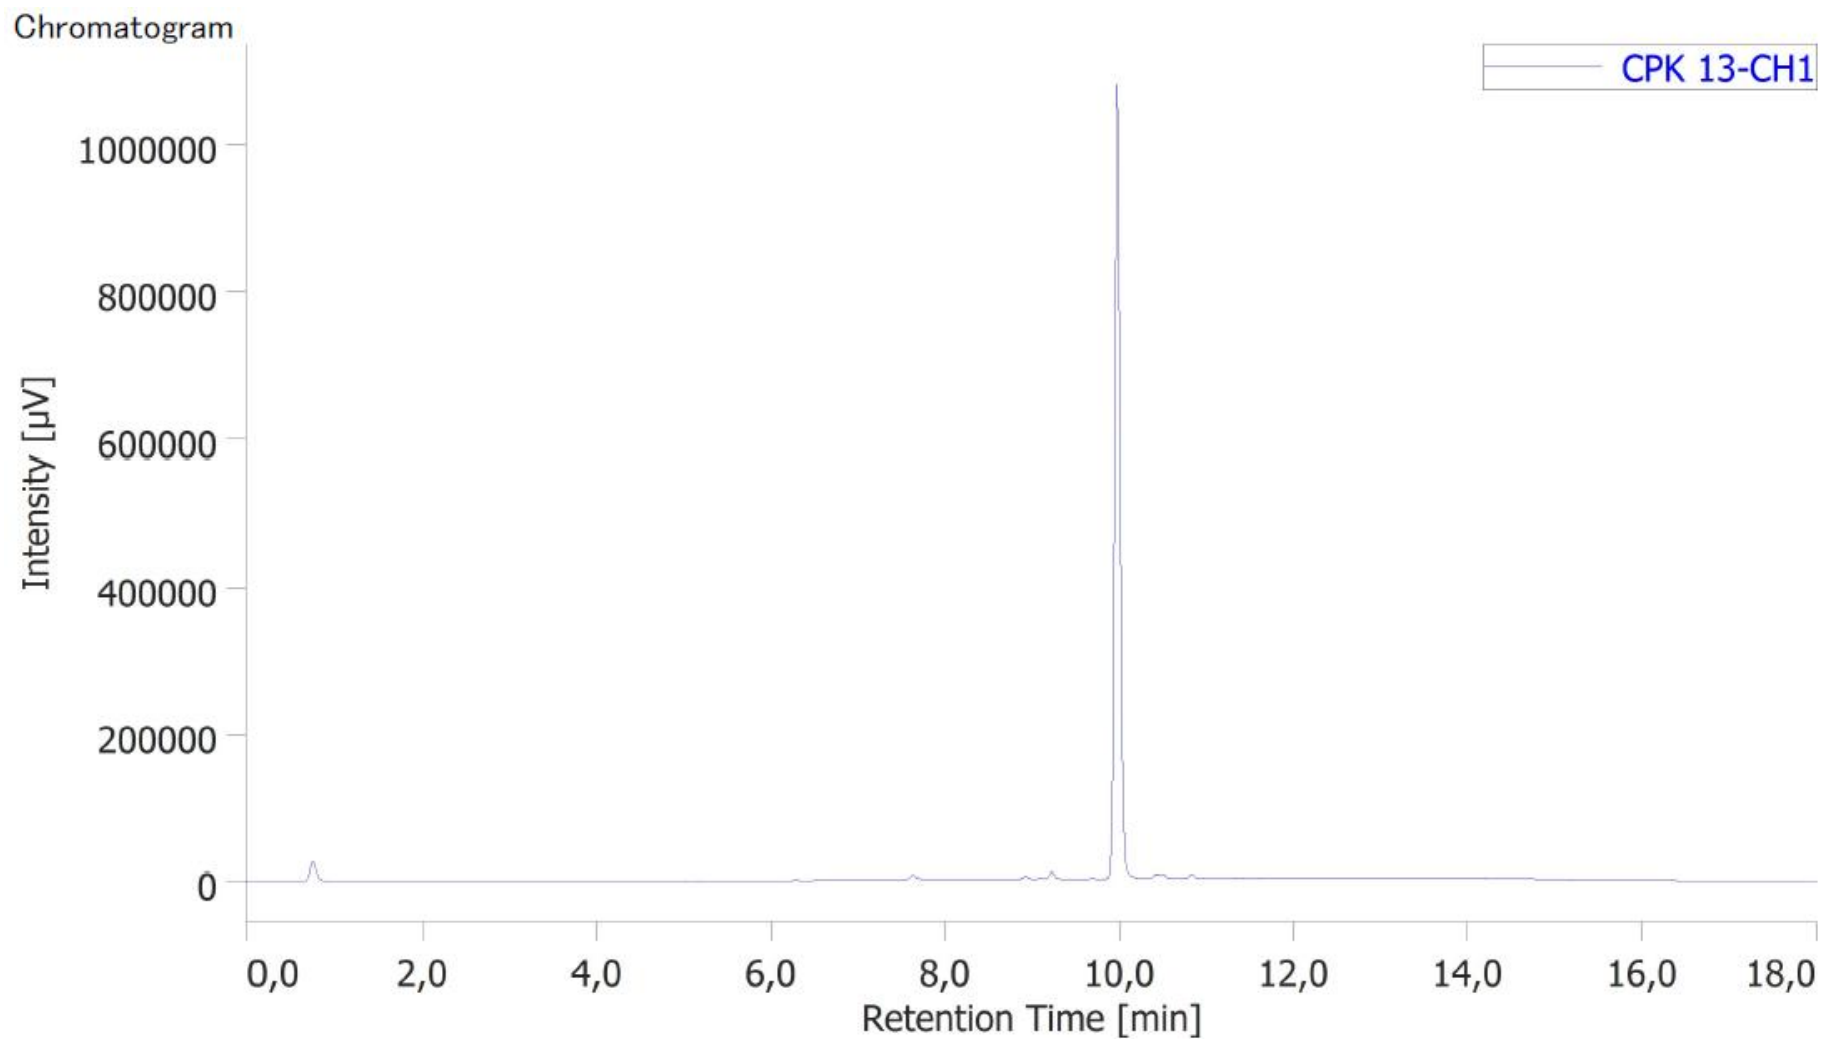

**Figures S35:** HPLC traces of compound **CPK13**

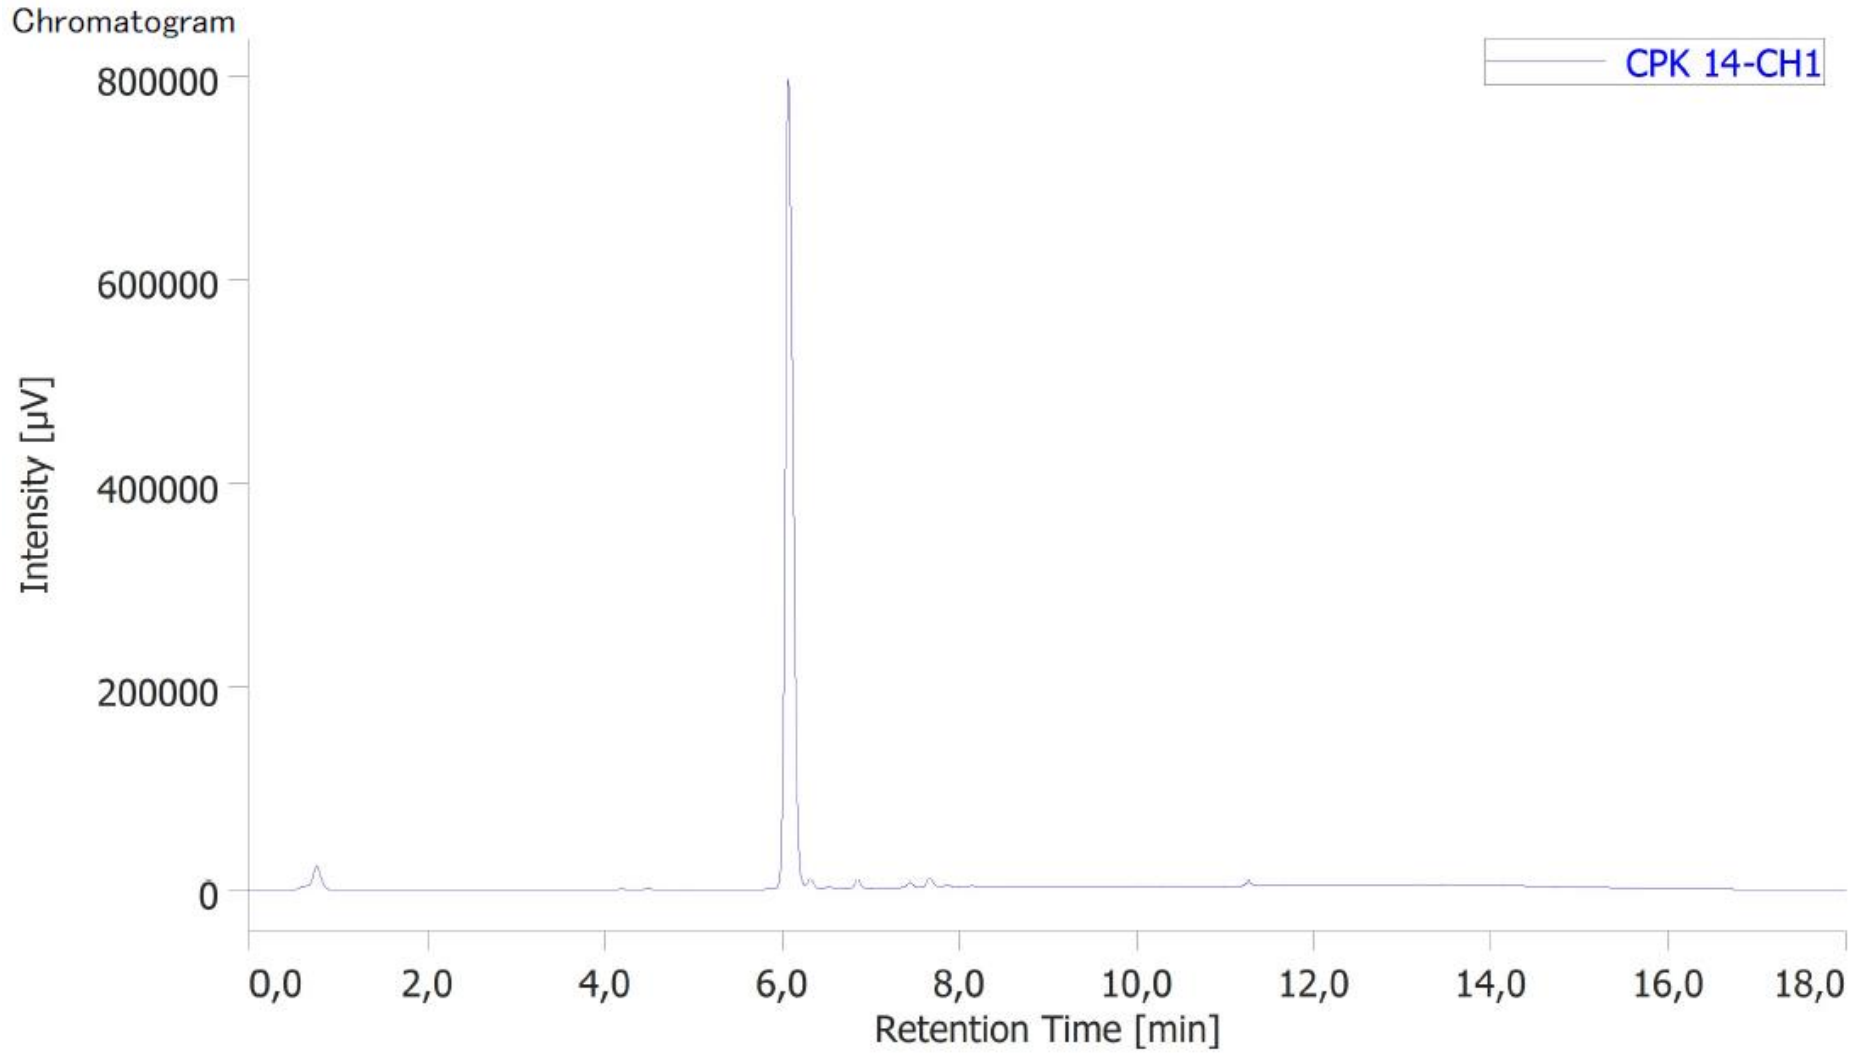

Figures S36: HPLC traces of compound **CPK14**

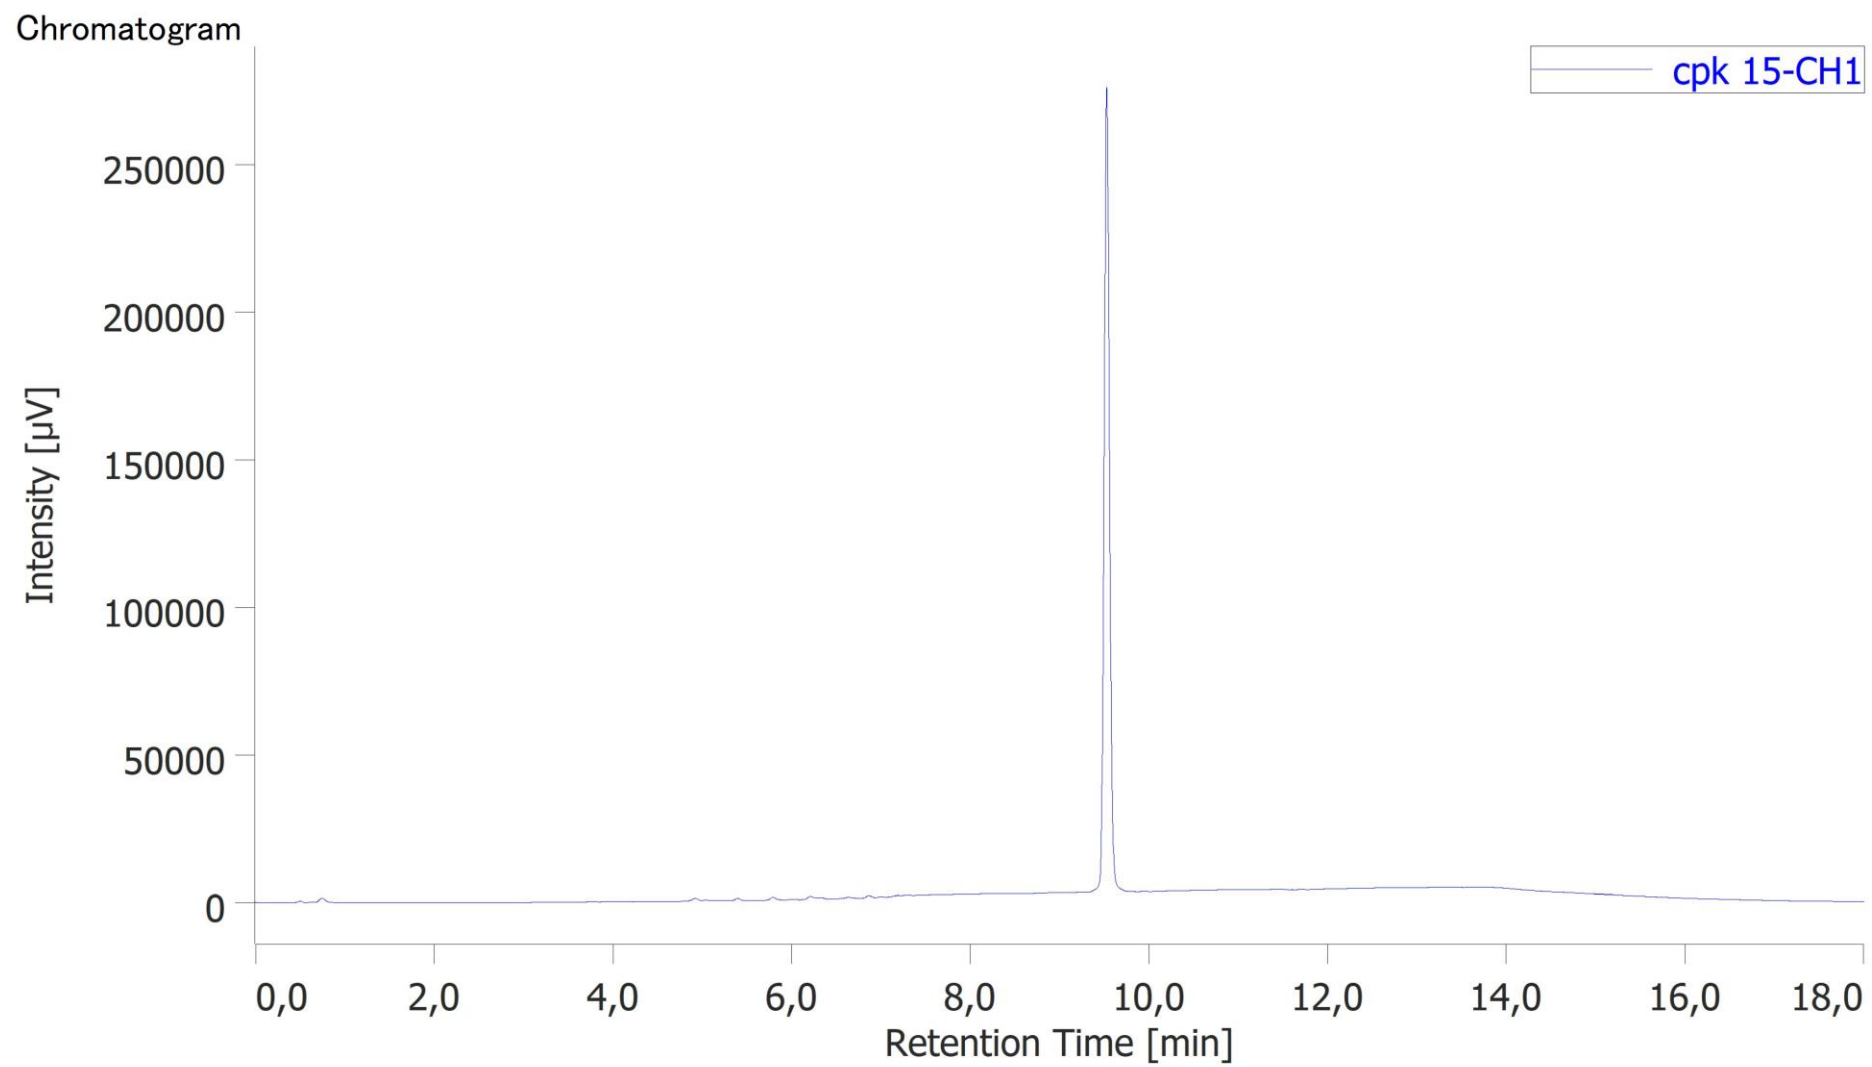

**Figures S37:** HPLC traces of compound **CPK15**

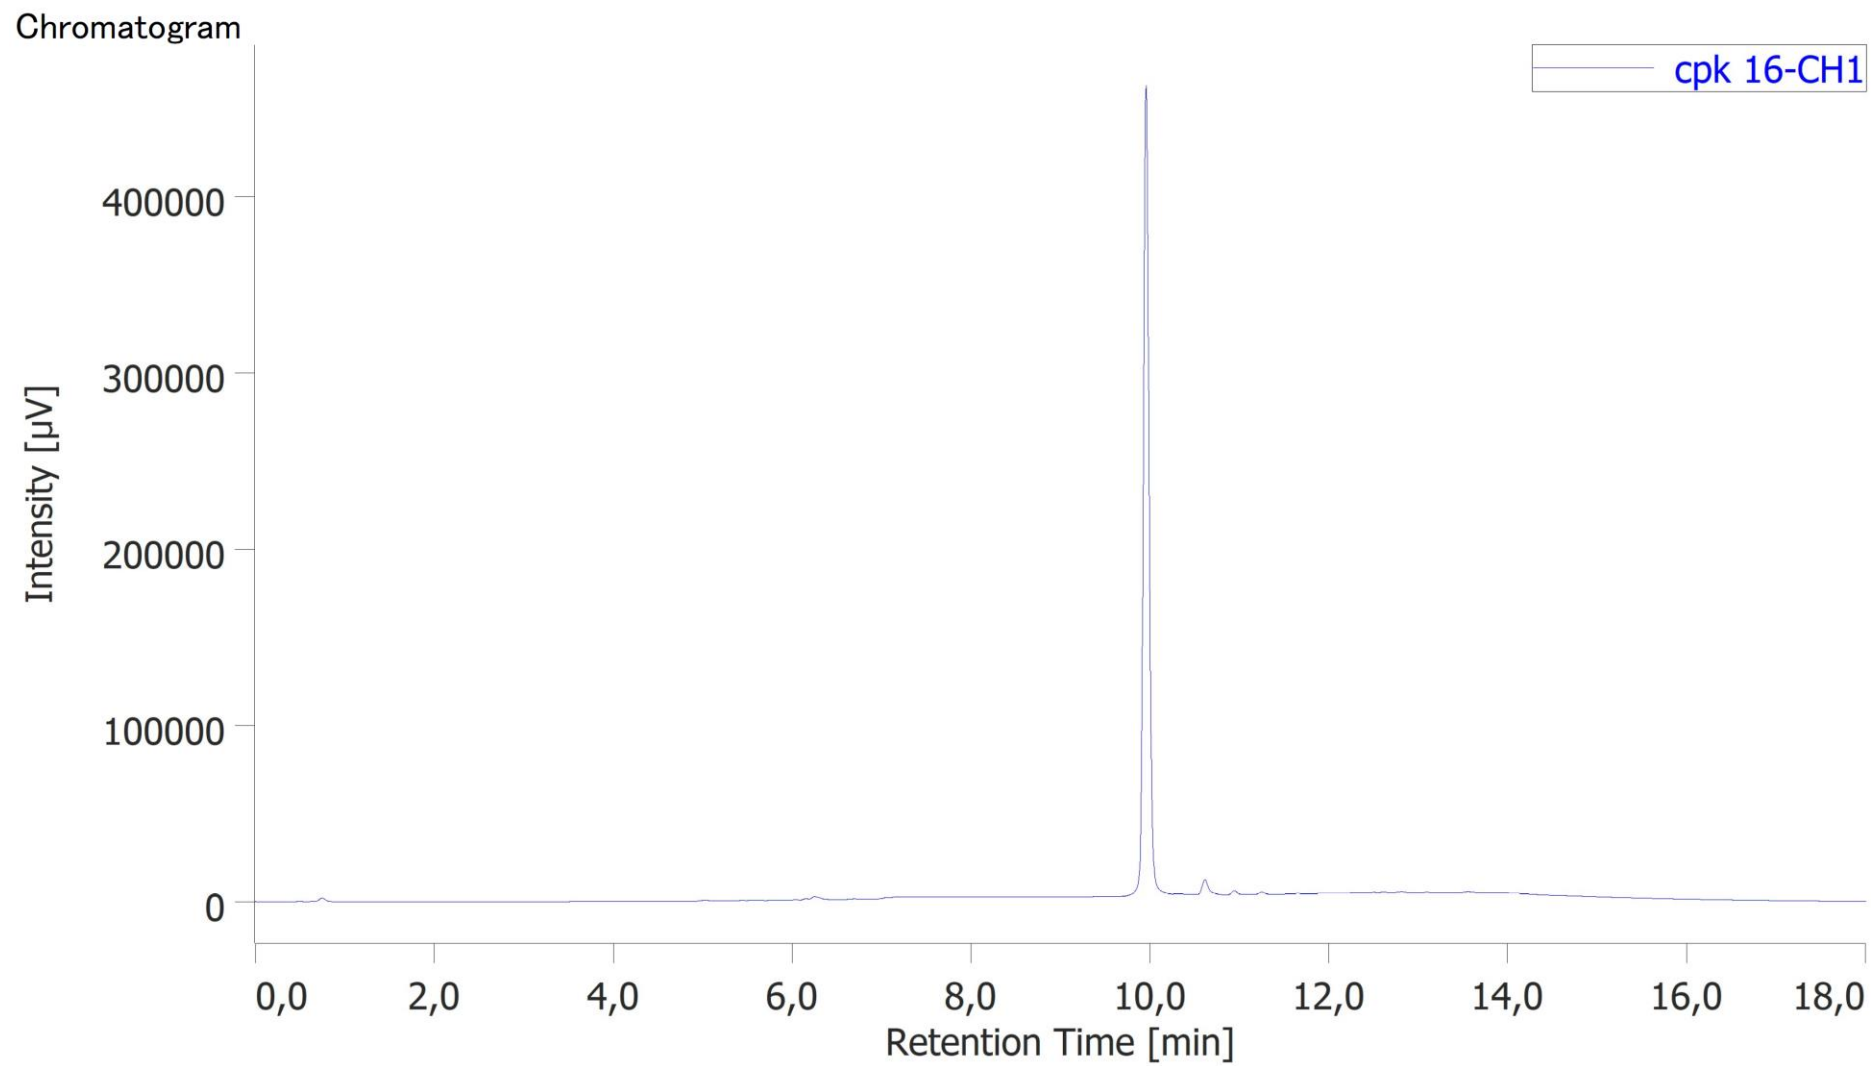

**Figures S38:** HPLC traces of compound **CPK16**

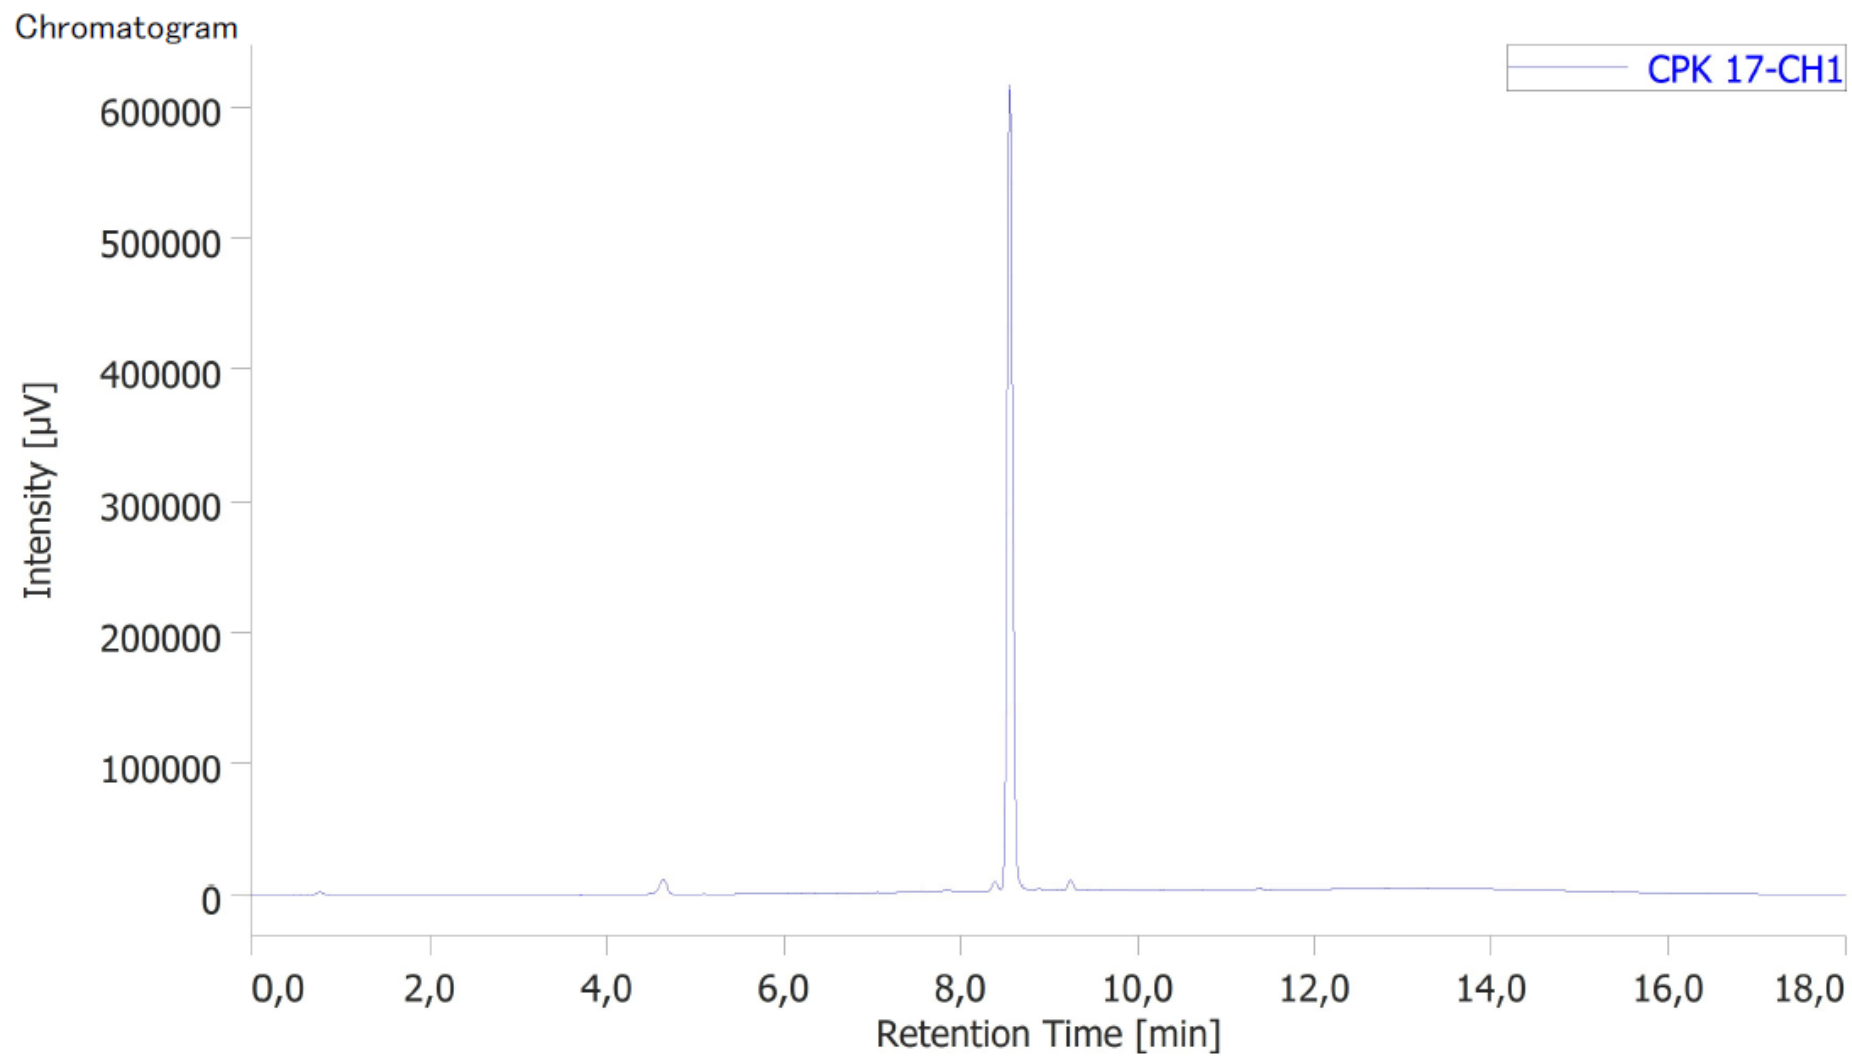

**Figures S39:** HPLC traces of compound **CPK17**

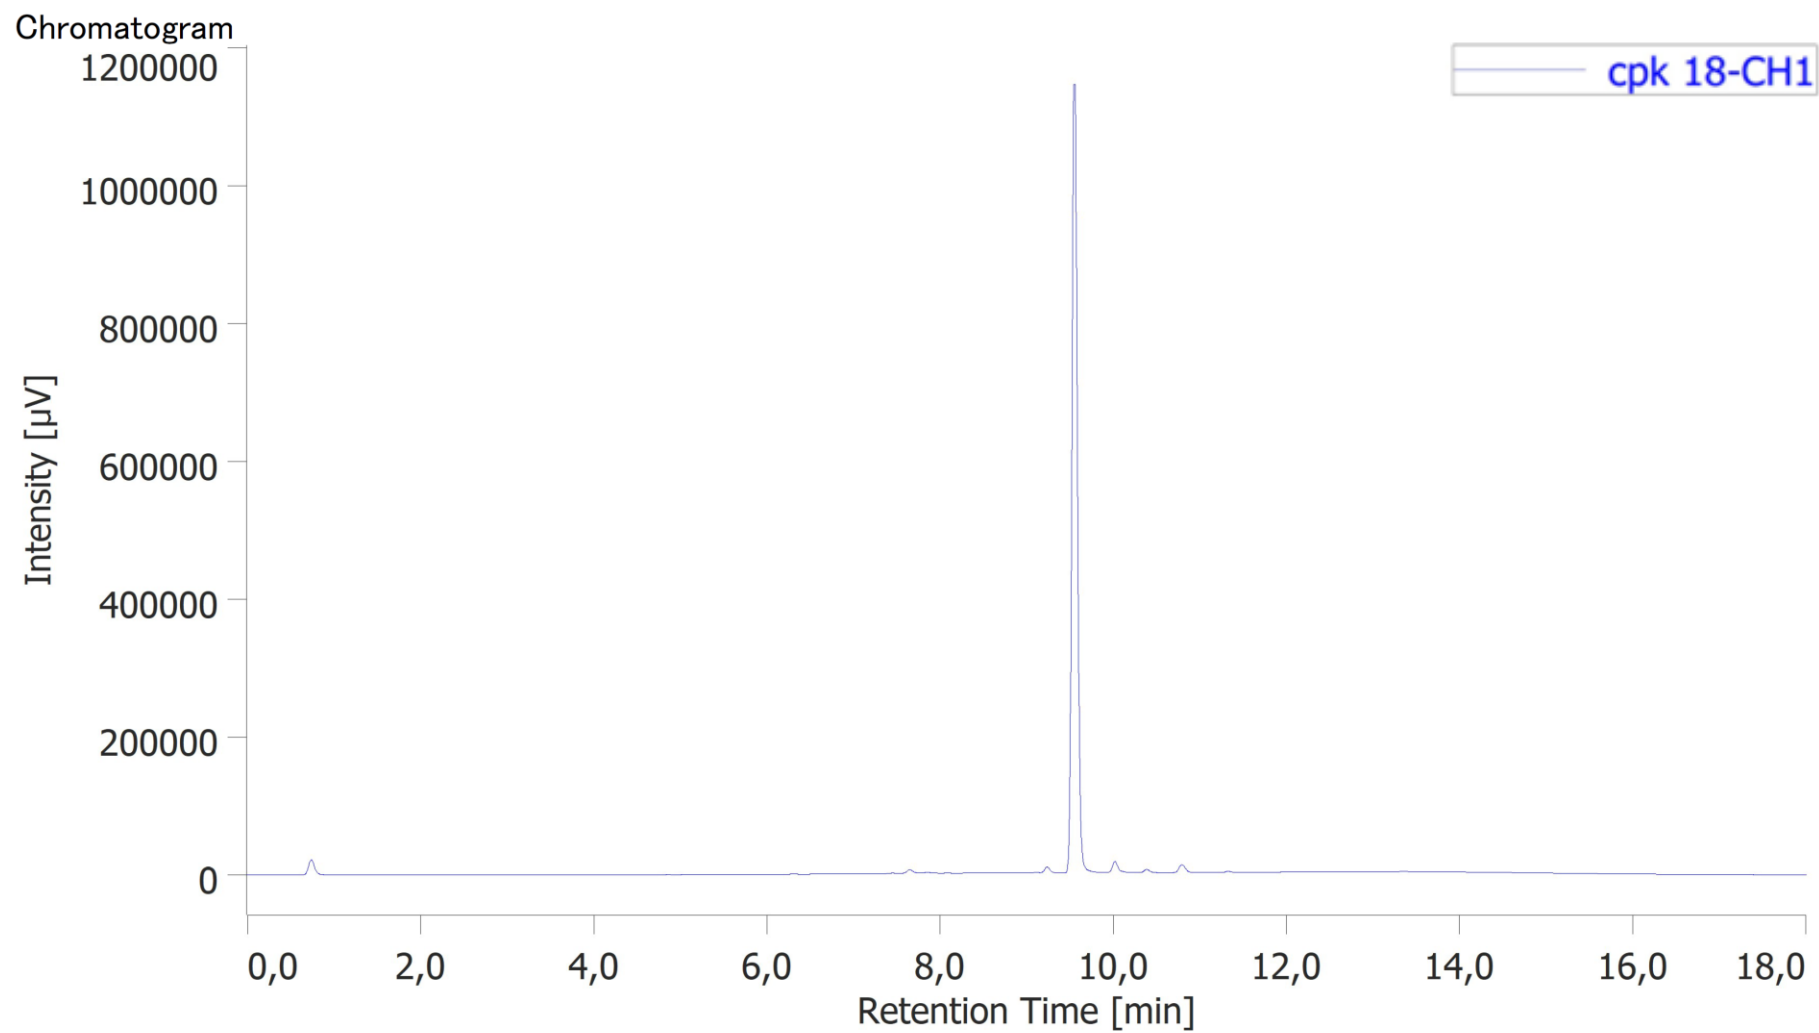

**Figures S40:** HPLC traces of compound **CPK18**

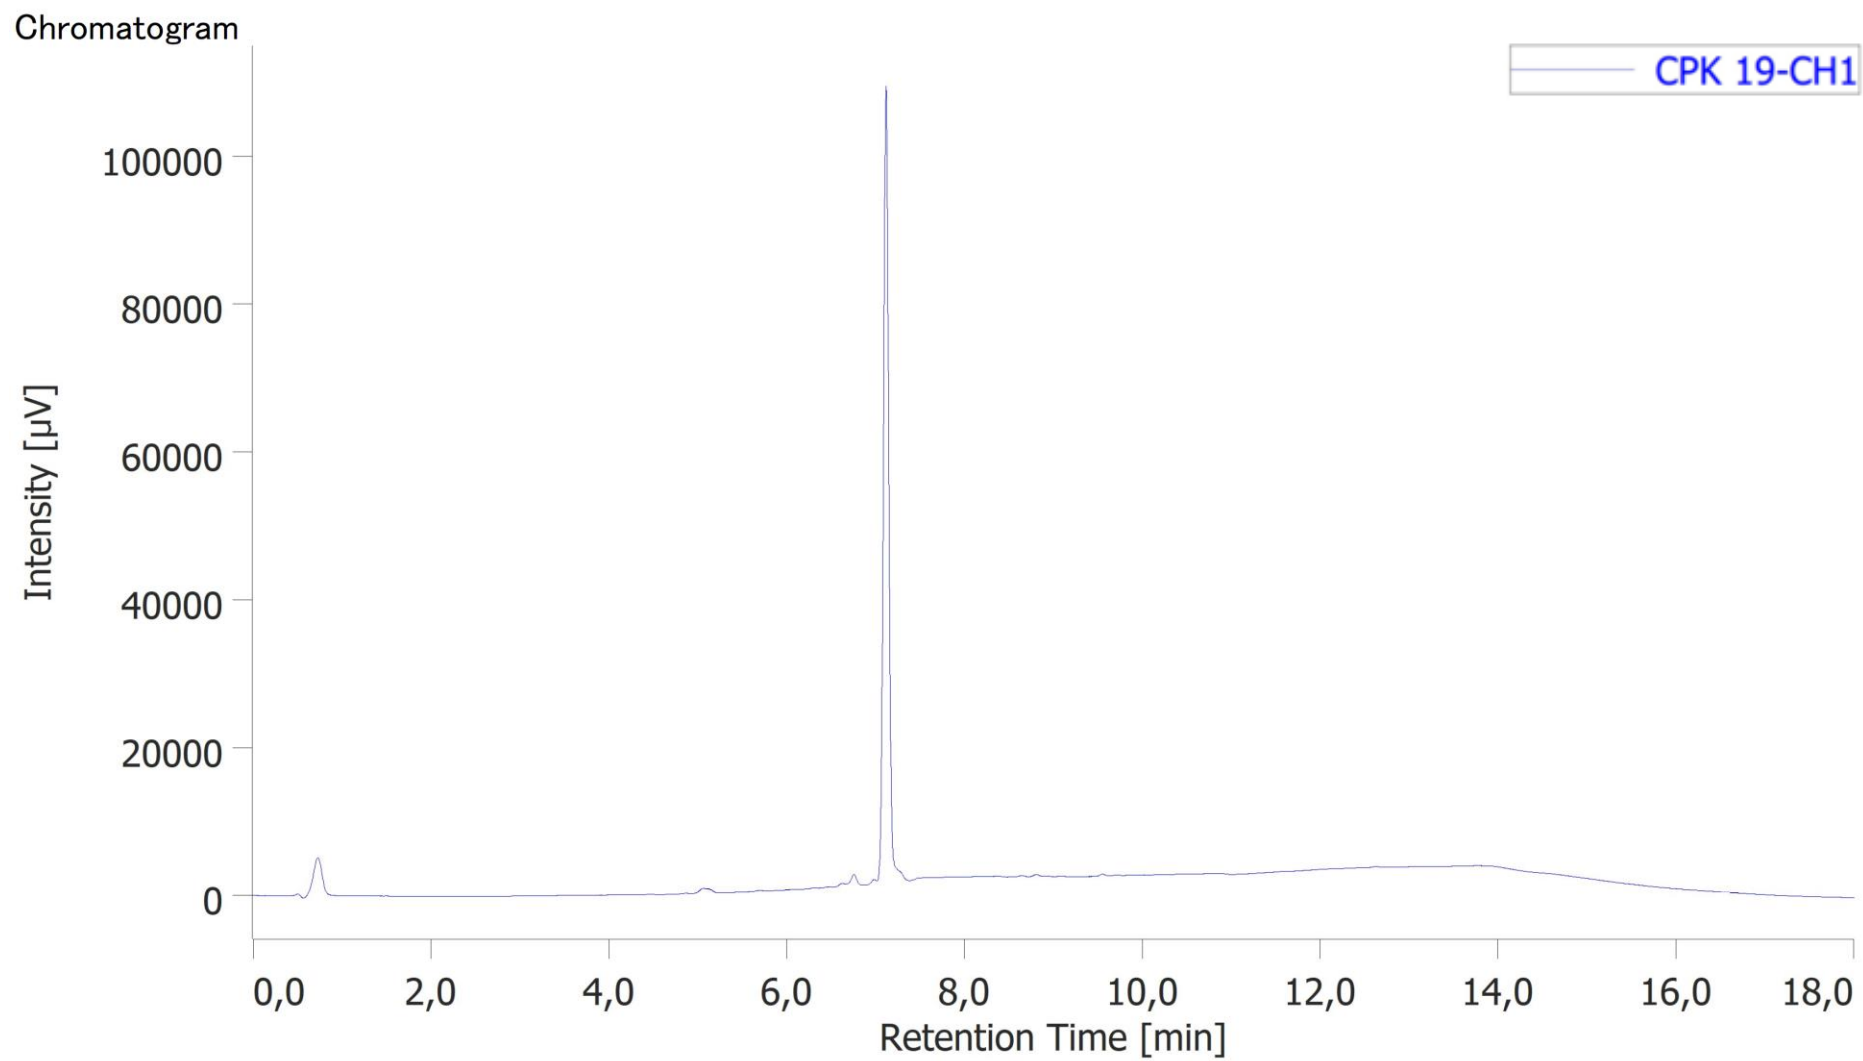

**Figures S41:** HPLC traces of compound **CPK19**



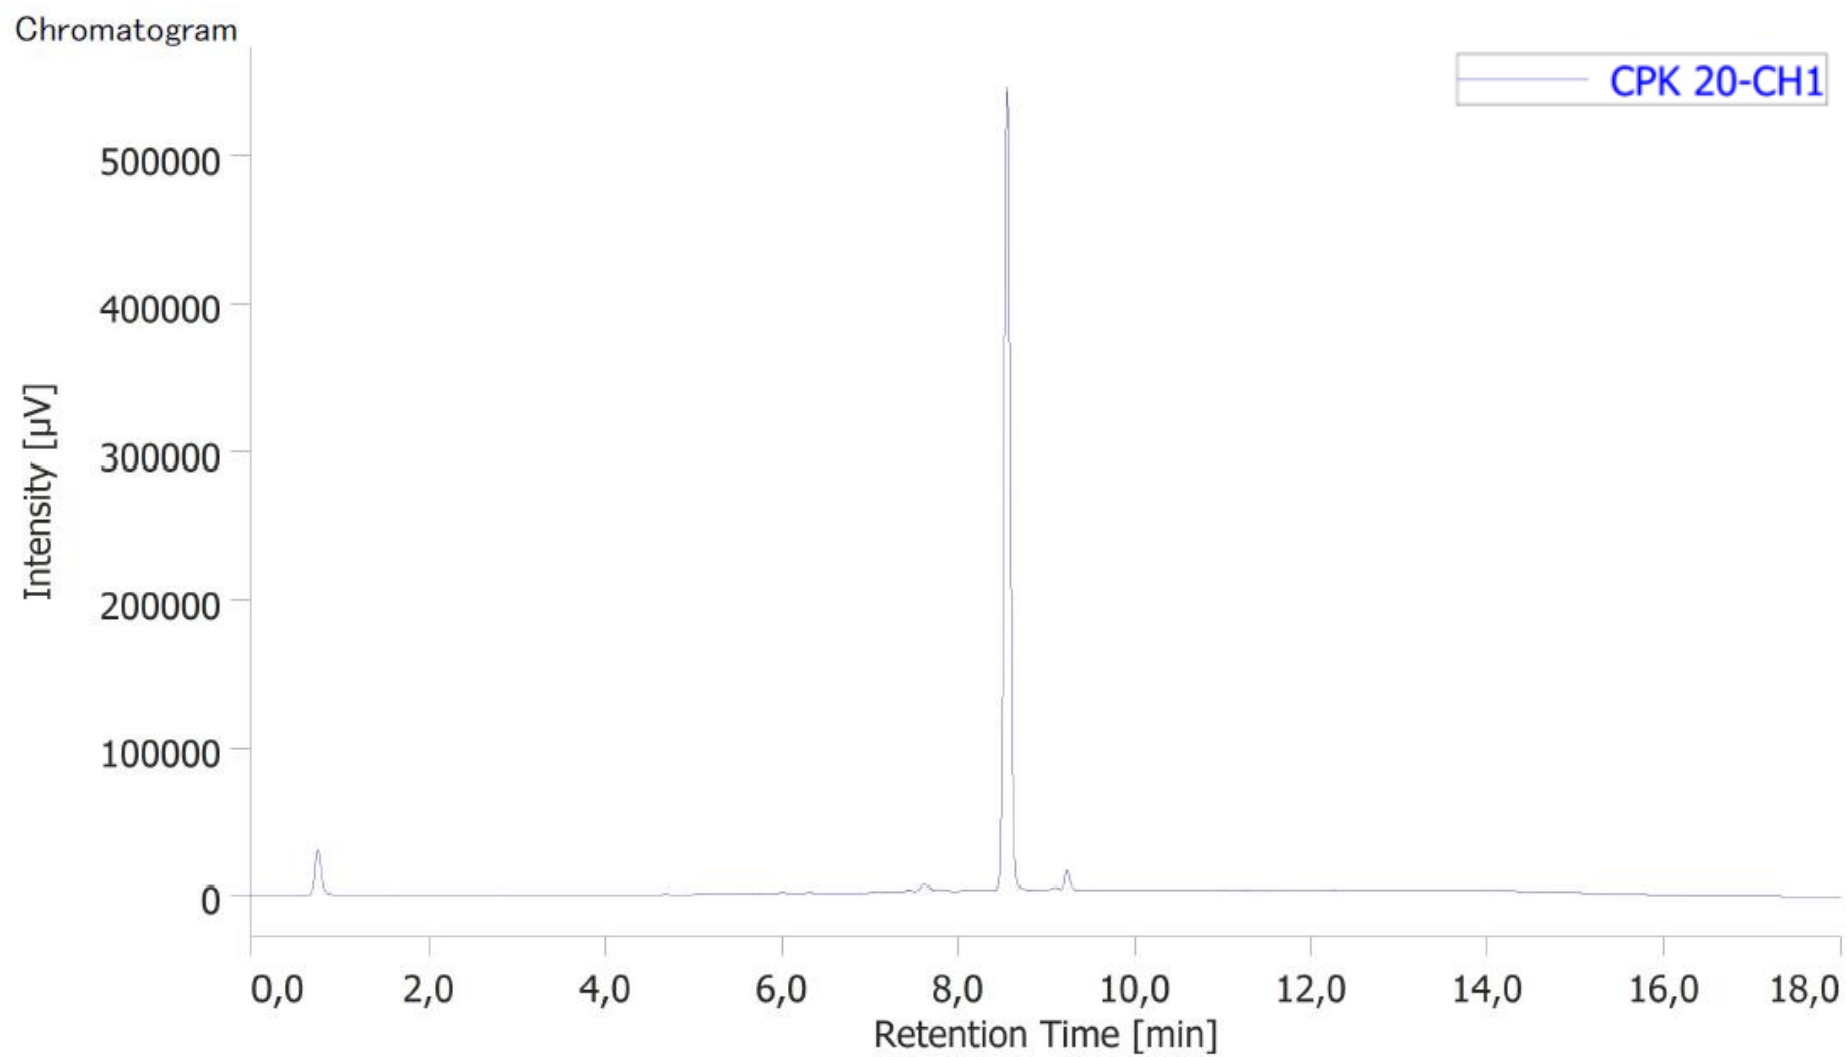

**Figures S42:** HPLC traces of compound CPK20

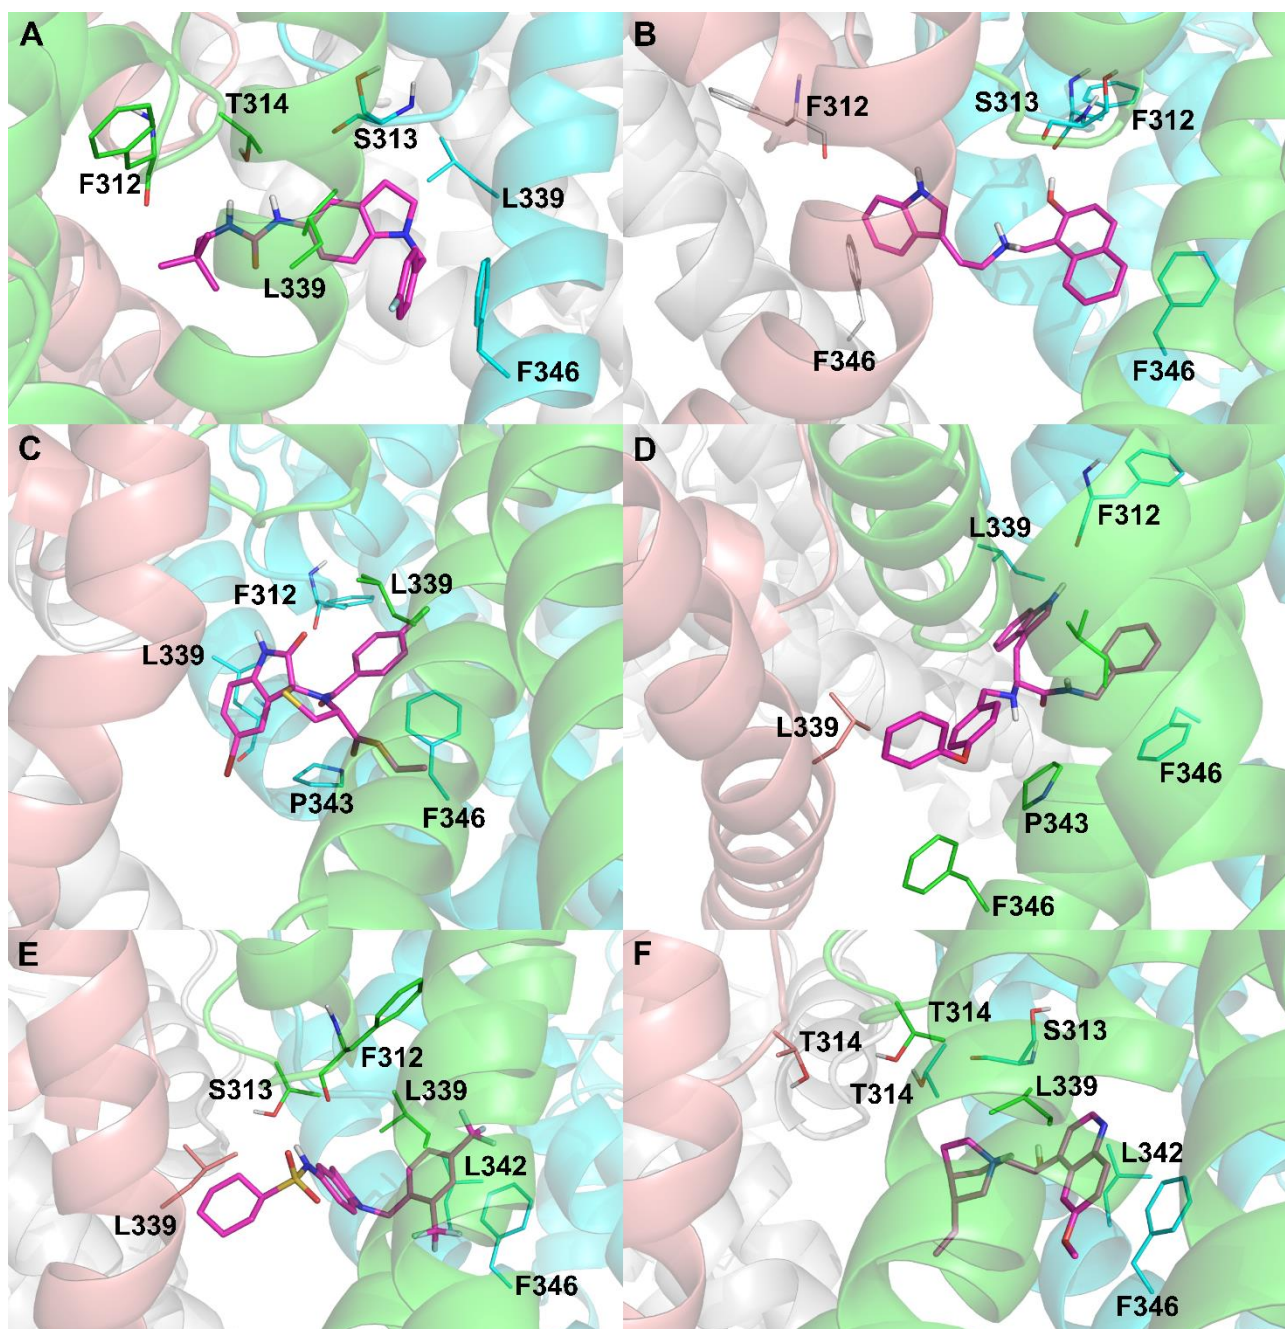

**Figure S43:** Docking poses of CPK4 (A), CPK13 (B), CPK16 (C), CPK18 (D), CPK20 (E) and quinidine (F) on HMhKCNT1<sub>198-354</sub>. In every panel, the ligand is depicted in magenta sticks and hKCNT1 monomers are depicted in cyan, green, salmon and white cartoons and sticks.

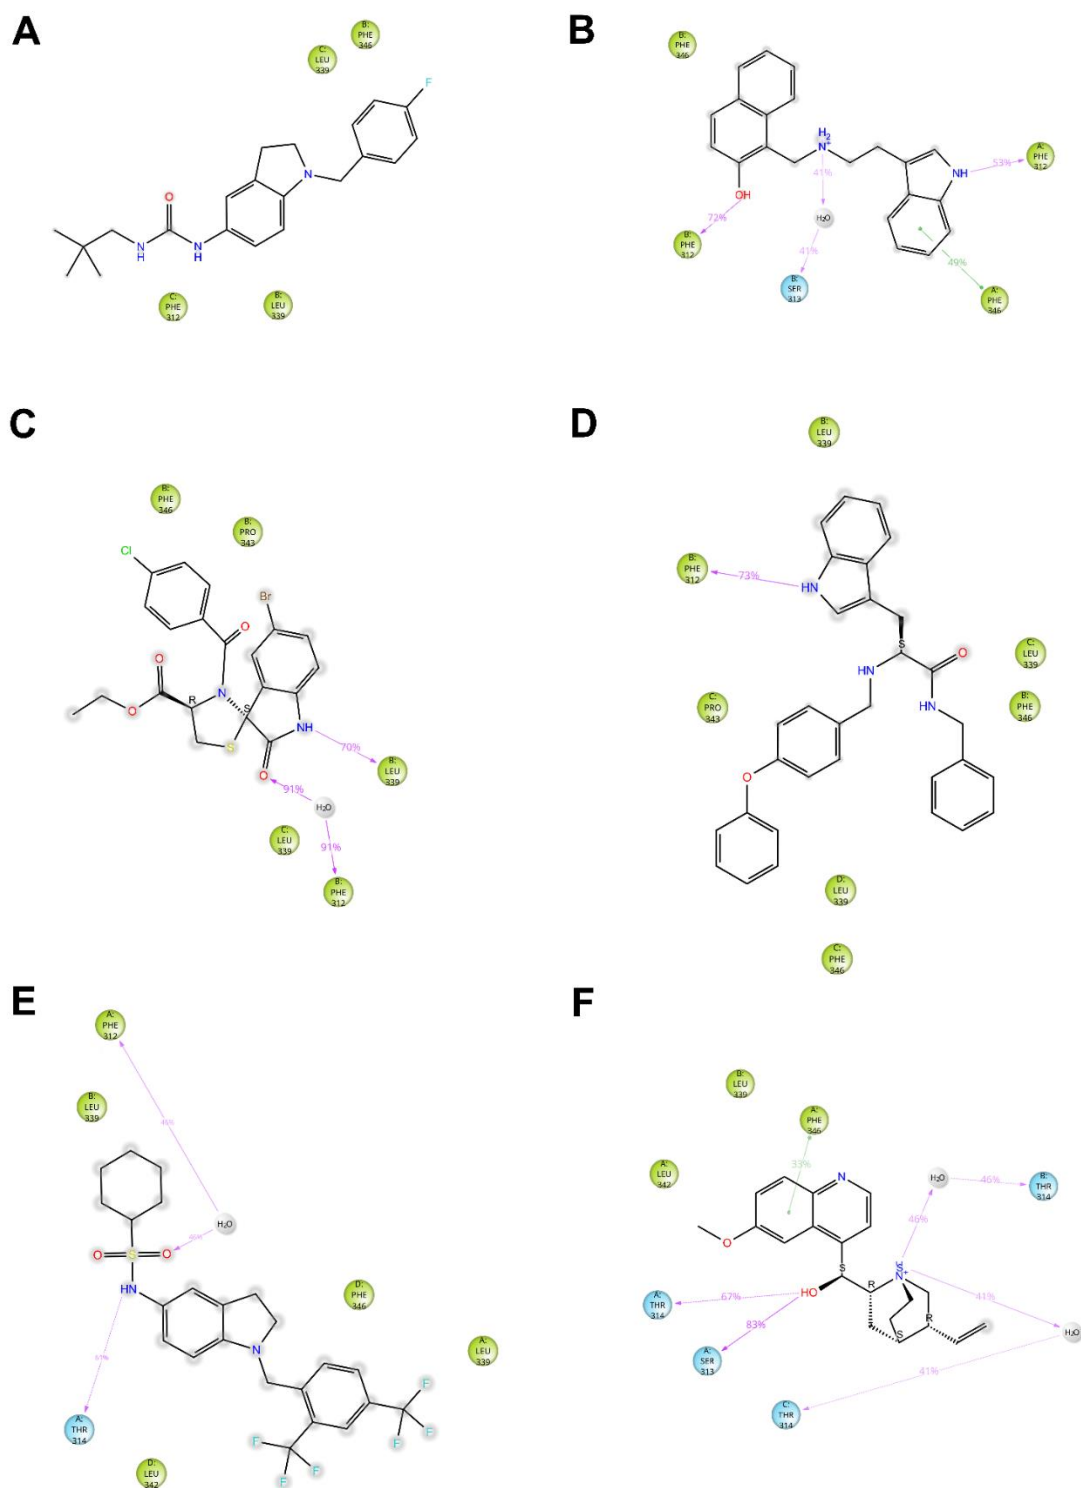

**Figure S44:** Ligand interaction diagrams of CPK4 (A), CPK13 (B), CPK16 (C), CPK18 (D), CPK20 (E) and quinidine (F) in complex with HMhKCNT<sub>198-354</sub>. Only residues interacting with the ligand for at least 36ns out 120ns of MD simulation are shown. Residues are colored according to the following scheme: cyan - polar; green - hydrophobic; grey - water molecule. Grey halos highlight solvent exposure. H-bonds are represented by magenta arrows (dashed when sidechain atoms are involved, solid in the case of backbone atoms involvement); green solid lines represent  $\pi$ - $\pi$  stacking interactions.

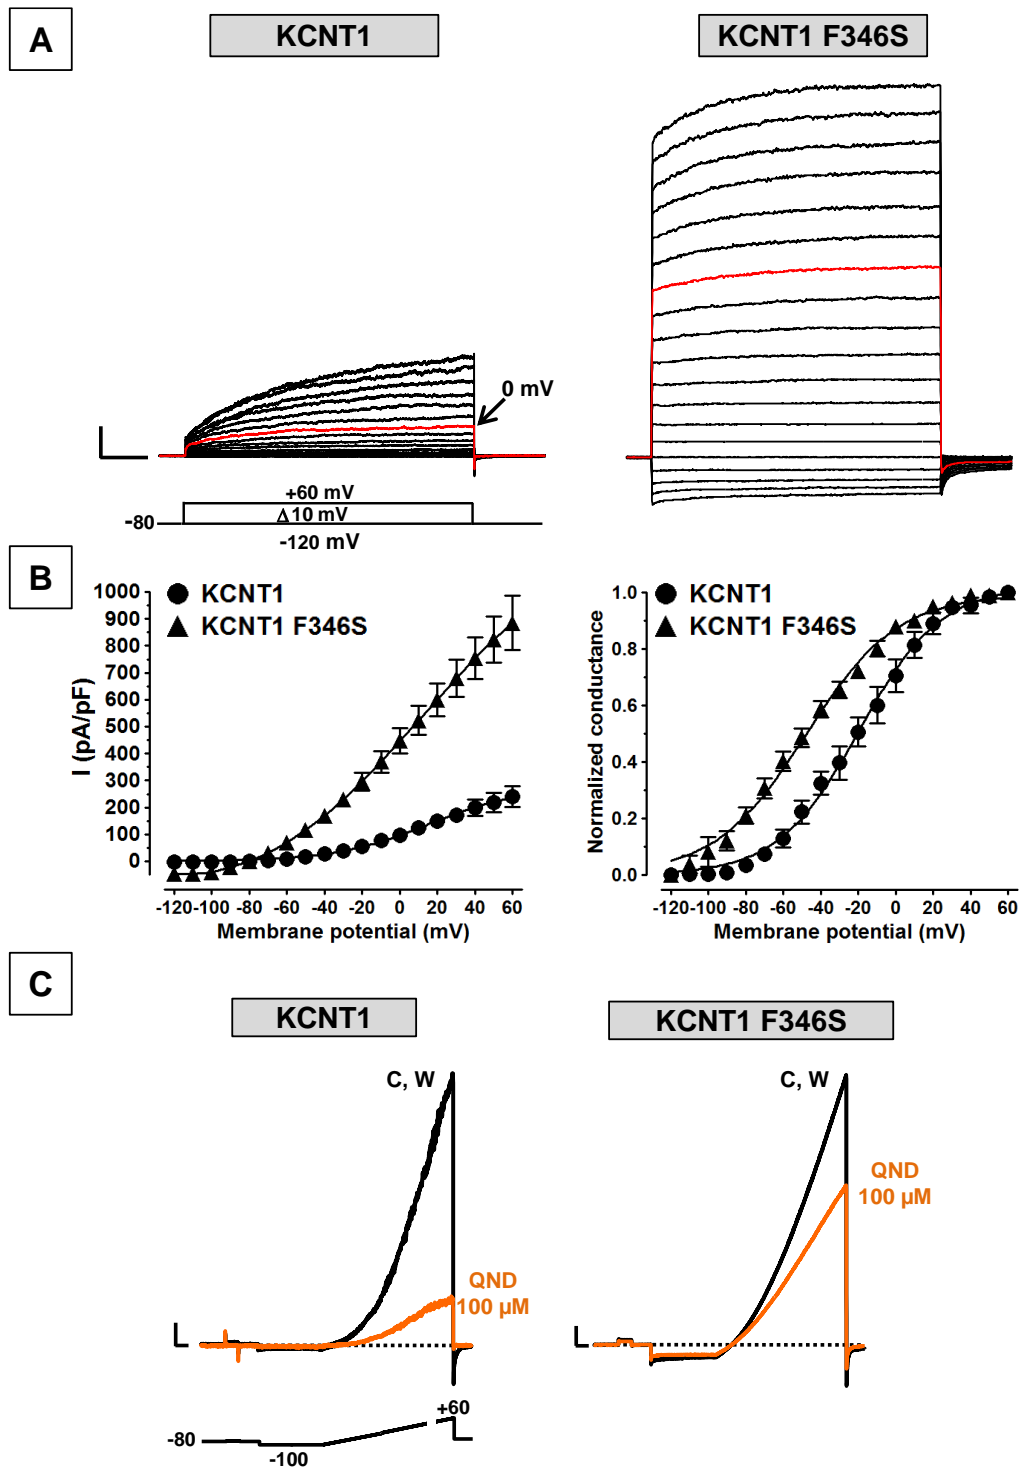

**Figure S45: Functional and pharmacological properties of KCNT1 F346S channels.** (A) Representative whole-cell currents traces recorded from CHO cells expressing wild-type or mutant homomeric KCNT1 channels, as indicated, in response to the voltage protocol shown below the leftmost traces. Current scale: 1 nA; time scale: 100 ms. (B) Current density (left) and normalized conductance (right) of wild-type and mutant KCNT1 channels. (C) Representative current traces measured in response to voltage ramps from -100 mV to +60 mV in cells expressing KCNT1 or KCNT1 F346S channels in control solution (C), upon perfusion of 100  $\mu$ M of quinidine (QND), or upon drug washout (W). Current scale: 200 pA for KCNT1, 1 nA for KCNT1 F346S; time scale: 100 ms.

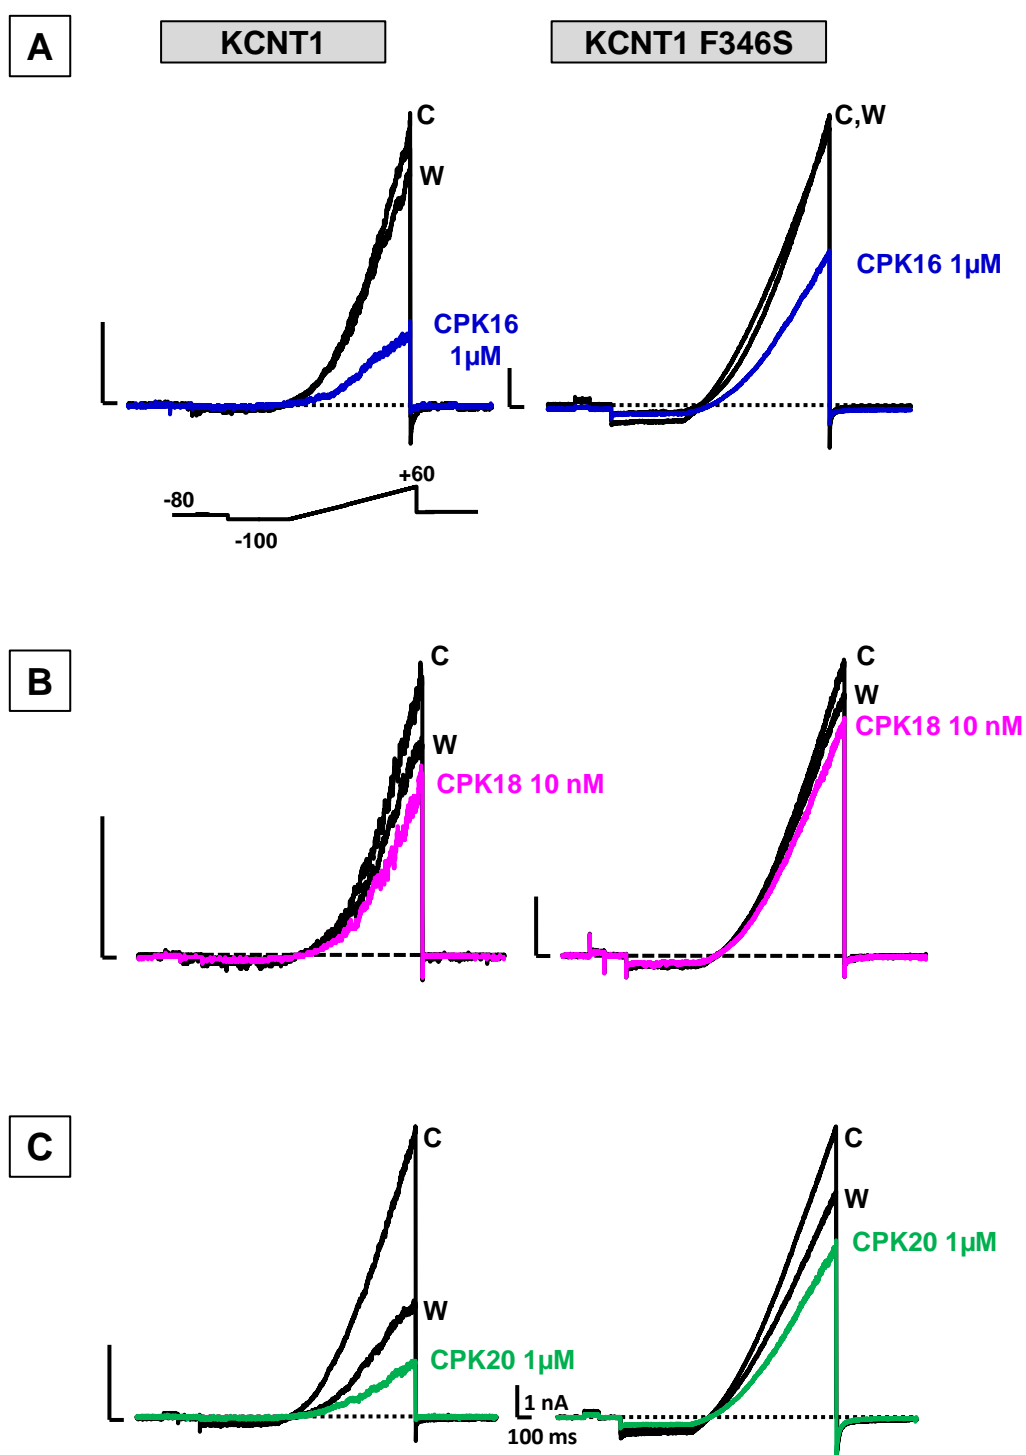

**Figure S46: Pharmacological characterization of selected CPK compounds on KCNT1 or KCNT1 F346S channels.** (A-B-C) Representative current traces in response to voltage ramps from -100 mV to +60 mV in cells expressing KCNT1 or KCNT1 F346S channels recorded in control solution (CTL), upon perfusion with **CPK16** (10 μM), **18** (10 nM), or **20** (10 μM), or upon drug washout (W). Current scale: 1 nA; time scale: 100 ms.

| Parameters                                  | CPK16           | CPK18           | CPK20           |
|---------------------------------------------|-----------------|-----------------|-----------------|
| Retention time (min) $\pm$ dev. st. (n = 6) | 4.34 $\pm$ 0.01 | 2.88 $\pm$ 0.01 | 2.67 $\pm$ 0.01 |
| Linearity range ( $\mu$ M)                  | 0.125-20.0      | 0.250-20.0      | 0.06-10.0       |
| Intercept                                   | -0,0332         | -0.3627         | 0.0418          |
| Slope                                       | 1.8894          | 0.1901          | 0.0822          |
| Correlation coefficient ( $R^2$ )           | 0.9999          | 0.9992          | 0.9992          |
| Standard deviation of intercept             | 0.0352          | 0.1222          | 0.0537          |
| Standard deviation of the slope             | 0.0081          | 0.0027          | 0.0010          |
| Standard deviation of residuals             | 0.0753          | 0.2407          | 0.1174          |
| LOD (nM)                                    | 8.7             | 15.4            | 3.0             |
| LOQ (nM)                                    | 26.4            | 46.6            | 1.0             |

**Table S2:** Method validation parameters for LC/MS quantitation of test compounds.

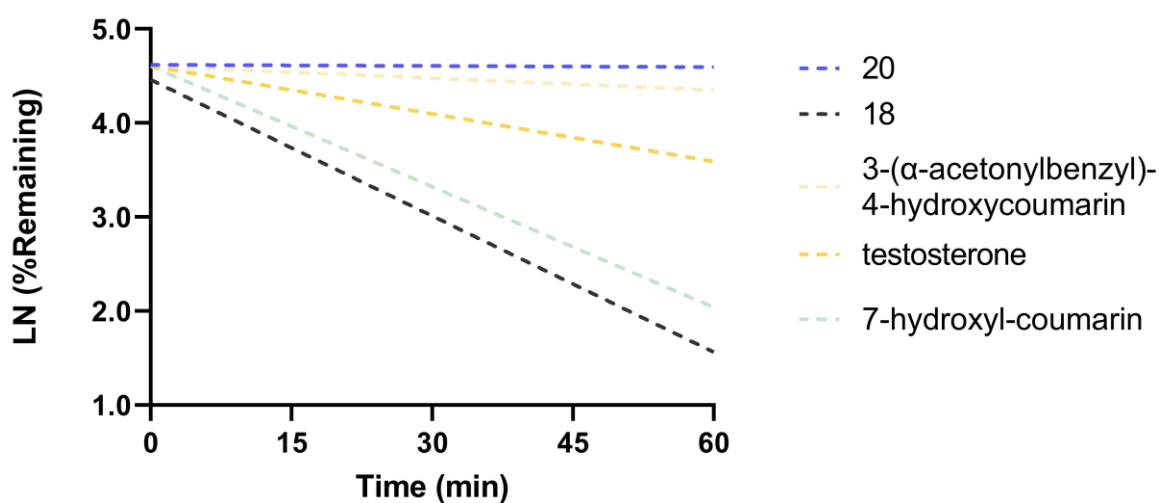

**Figure S47:** Representative graph showing the linear regression of the natural logarithm of % remaining parent compounds **CPK19** and **CPK20** plotted against incubation time (min). 3-( $\alpha$ -acetonylbenzyl)-4-hydroxycoumarin, testosterone, 7-hydroxyl-coumarin were employed as controls for high, moderate, and low metabolic stability.

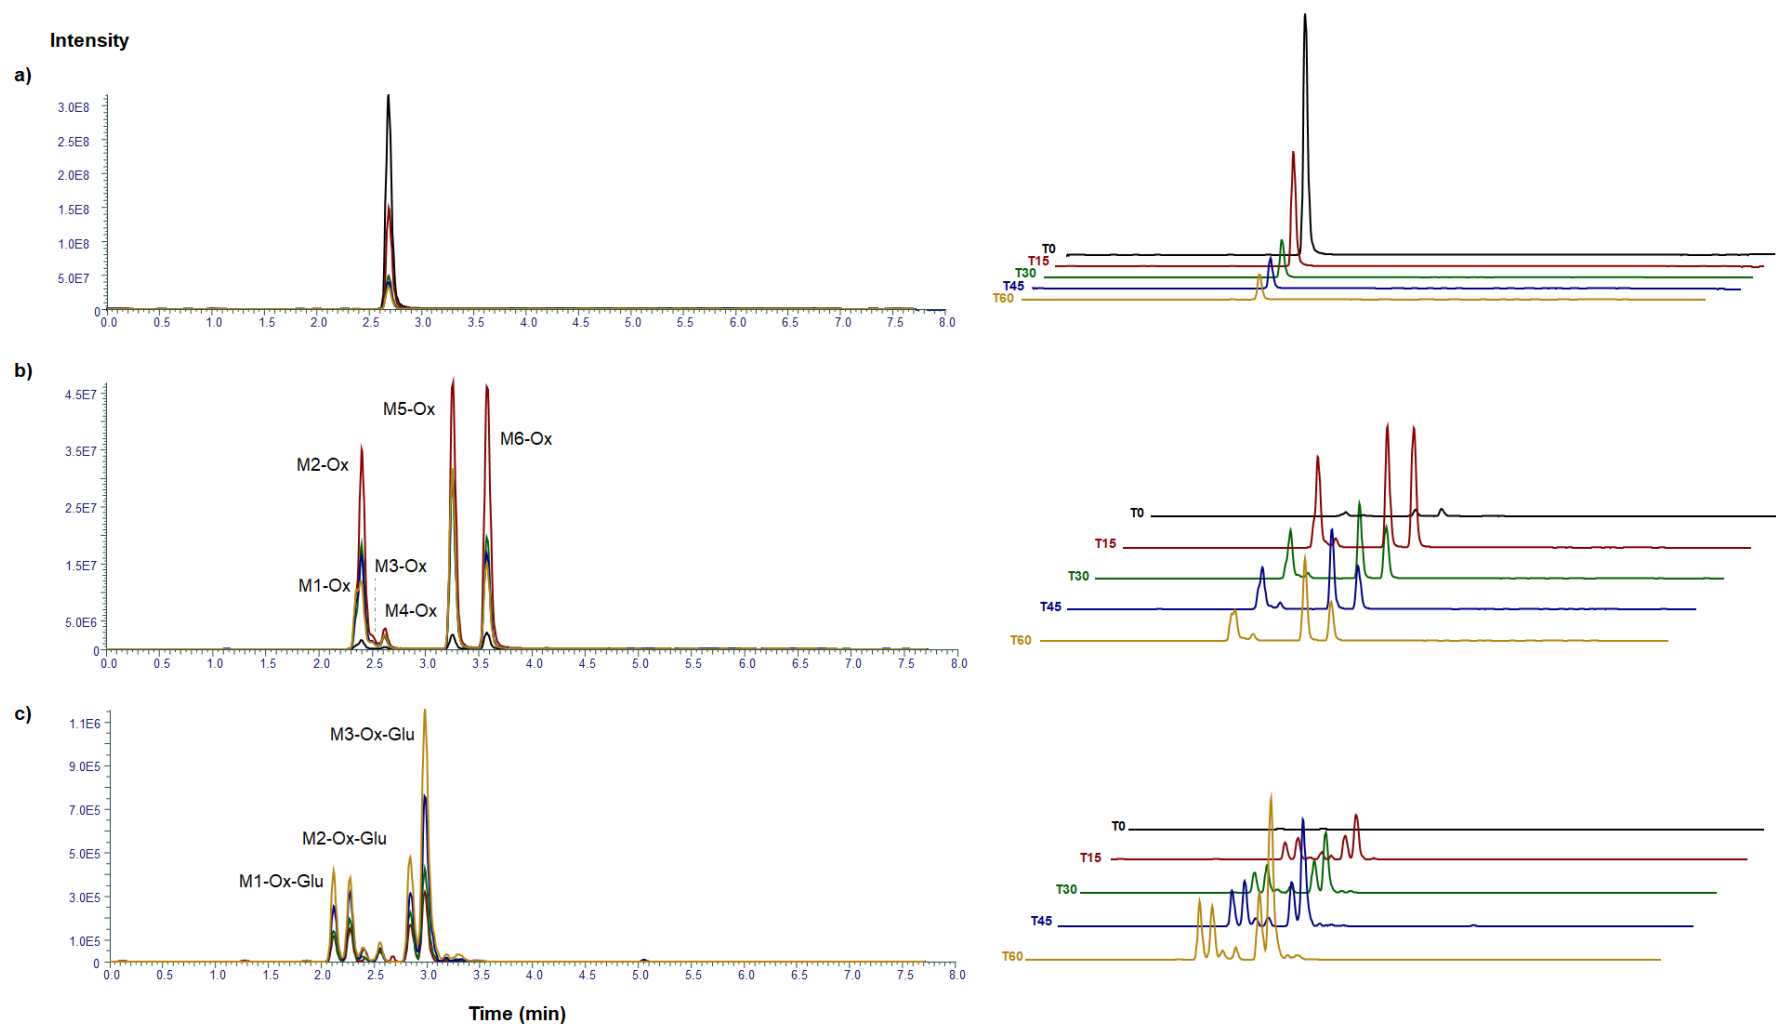

**Figure S48:** Compound **CPK18** metabolic fate as determined by LC analysis. **(a)** Time course LC traces showing **CPK18** metabolic-dependent decrease in concentration; **(b)** Time course LC trace of the **CPK18** oxidized metabolites; **(c)** Time course LC trace of the main **CPK18** glucuronic metabolites.



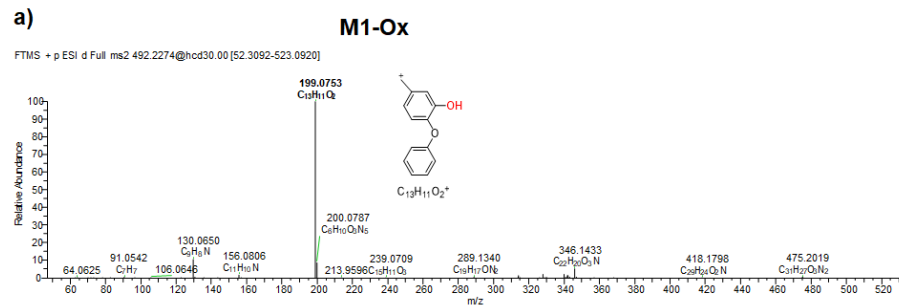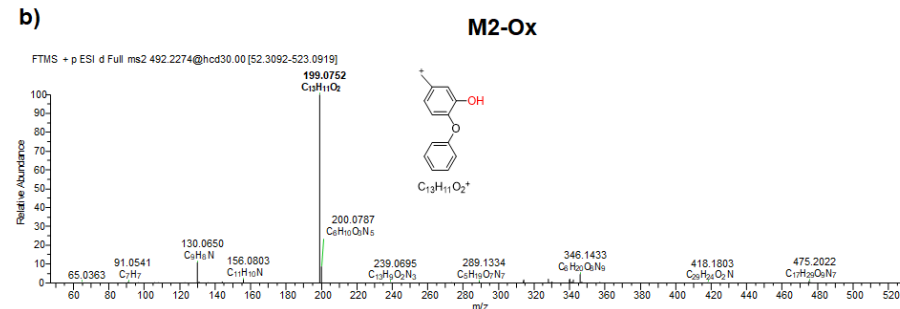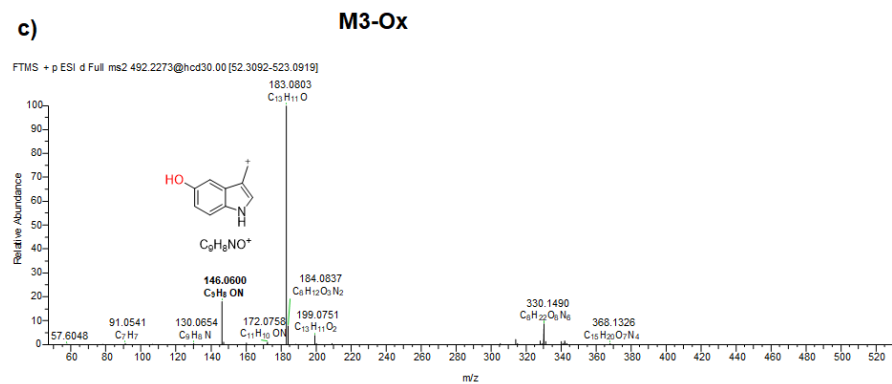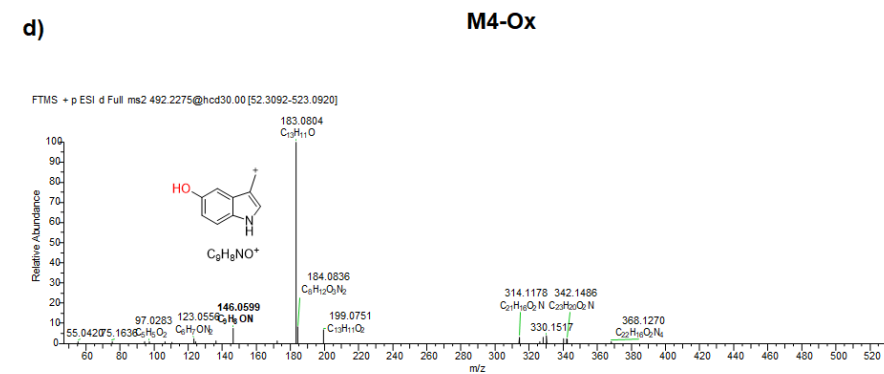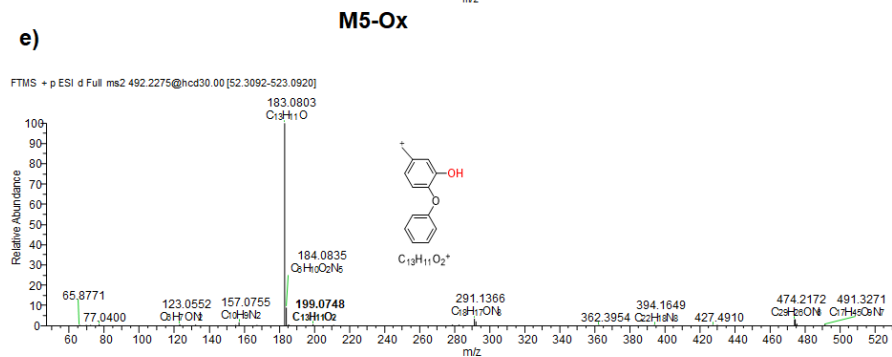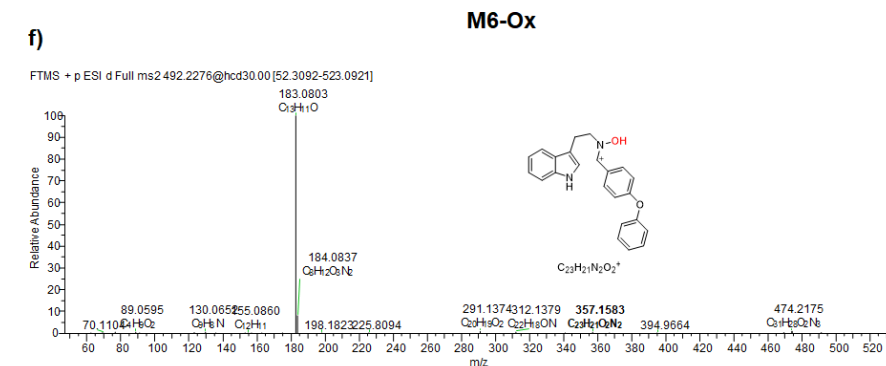

**Figure S49:** Molecular structures of compound **CPK18** oxidized metabolites M1-Ox (a), M2-Ox (b), M3-Ox (c), M4-Ox (d), M5-Ox (e) and M6-Ox (f) as determined by MS/MS analysis.



### M1-Ox-Glu

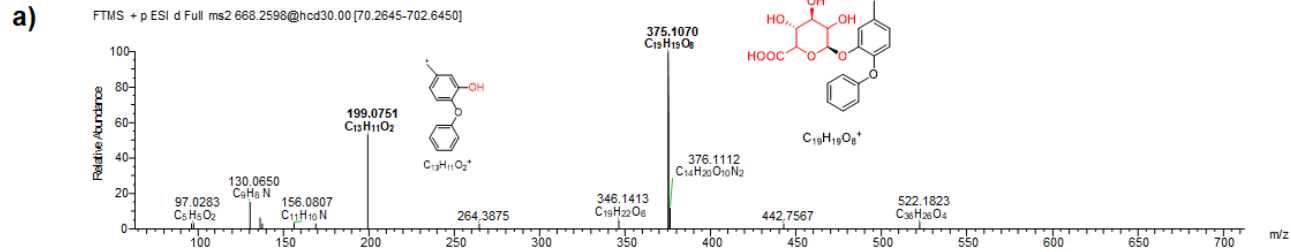

### M2-Ox-Glu

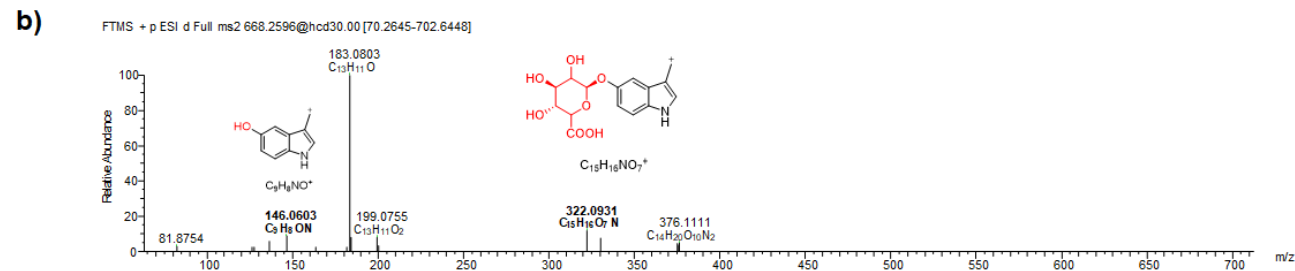

### M3-Ox-Glu

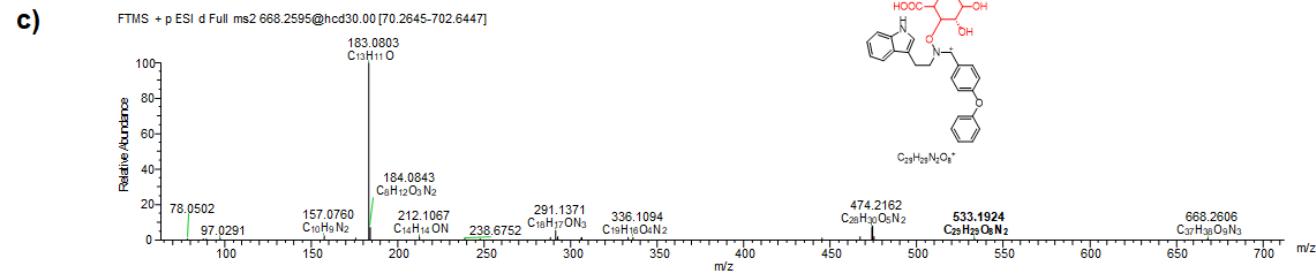

**Figure S50:** Molecular structures of compound **CPK18** glucuronic metabolites M1-Ox-Glu (a), M2-Ox-Glu (b) and M3-Ox-Glu (c) as determined by MS/MS analysis
